# Supplementary material for: Danmu subtitling as a self-regulative practice: a descriptive discourse analysis of Bilibili danmu subtitles from ethical perspectives
Source: Front Psychol. 2025 Jul 30;16:1577260. doi: 10.3389/fpsyg.2025.1577260 (PMC12346043; doi:10.3389/fpsyg.2025.1577260)
Supplement: Supplementary file 1 [file Data_Sheet_1.xlsx]

## Sheet: Raw data
/i
/chatid	/chatid/#agg	/chatserver	/d	/d/@p	Unix time	Danmu appeared time (second)	Danmu rowid	Danmu pool	User ID	danmu Colour	Subtitle mode and size	/maxlimit	/maxlimit/#agg	/mission	/mission/#agg	/real_name	/real_name/#agg	/source	/state	/state/#agg
29495211	29495211	chat.bilibili.com	反正菲菲肯定是这个小女孩。	244.87700,1,25,16777215,1691175781,0,8ec7c176,1376441235497443328,10	1691175781	244.87700	1376441235497443328	,0,	8ec7c176	16777215	1,25	6000	6000	0	0	0	0	k-v	0	0
29495211		chat.bilibili.com	标题说生肉意思就是说没有中文字幕，熟肉才是有中的翻译。	66.61500,1,25,16777215,1691175522,0,8ec7c176,1376439060918617344,10	1691175522	66.61500	1376439060918617344	,0,	8ec7c176	16777215	1,25	6000		0		0		k-v	0
29495211		chat.bilibili.com	真的很尴尬	1426.90400,1,25,16777215,1674864617,0,acdcdd51,1239613271800467200,10	1674864617	1426.90400	1239613271800467200	,0,	acdcdd51	16777215	1,25	6000		0		0		k-v	0
29495211		chat.bilibili.com	有钱真好	514.72400,1,25,16777215,1672928995,0,fdd33282,1223376094905095680,10	1672928995	514.72400	1223376094905095680	,0,	fdd33282	16777215	1,25	6000		0		0		k-v	0
29495211		chat.bilibili.com	】】、、】	1080.94300,1,25,16777215,1671166011,0,6e81d5c5,1208587113881504256,10	1671166011	1080.94300	1208587113881504256	,0,	6e81d5c5	16777215	1,25	6000		0		0		k-v	0
29495211		chat.bilibili.com	、	230.73500,1,25,16777215,1671165160,0,6e81d5c5,1208579981392060416,10	1671165160	230.73500	1208579981392060416	,0,	6e81d5c5	16777215	1,25	6000		0		0		k-v	0
29495211		chat.bilibili.com	我看到后面有一匹马，感觉要几十万的样子。	403.81400,1,25,16777215,1669776316,0,d3fe1148,1196929511187674624,10	1669776316	403.81400	1196929511187674624	,0,	d3fe1148	16777215	1,25	6000		0		0		k-v	0
29495211		chat.bilibili.com	旁边的好漂亮	2517.27000,1,25,16777215,1669556926,0,25ac2b79,1195089131911288576,10	1669556926	2517.27000	1195089131911288576	,0,	25ac2b79	16777215	1,25	6000		0		0		k-v	0
29495211		chat.bilibili.com	女主很像我，有福气面相，男主面相像我老公，一般般。	1514.22800,1,25,16777215,1669200070,0,55f4481,1192095605002984192,10	1669200070	1514.22800	1192095605002984192	,0,	55f4481	16777215	1,25	6000		0		0		k-v	0
29495211		chat.bilibili.com	专业童模吧	2509.90100,1,25,16777215,1668526396,0,2b3c71ca,1186444418308250112,10	1668526396	2509.90100	1186444418308250112	,0,	2b3c71ca	16777215	1,25	6000		0		0		k-v	0
29495211		chat.bilibili.com	菲菲有点社恐吧	2299.24100,1,25,16777215,1668526172,0,2b3c71ca,1186442545476032000,10	1668526172	2299.24100	1186442545476032000	,0,	2b3c71ca	16777215	1,25	6000		0		0		k-v	0
29495211		chat.bilibili.com	幸运数字哈哈哈哈哈哈	2207.16300,1,25,16777215,1668526080,0,2b3c71ca,1186441772524472832,10	1668526080	2207.16300	1186441772524472832	,0,	2b3c71ca	16777215	1,25	6000		0		0		k-v	0
29495211		chat.bilibili.com	出生在幸福的家庭，本身就喜欢小孩才生的小孩	2118.47700,1,25,16777215,1668525988,0,2b3c71ca,1186440997627226624,10	1668525988	2118.47700	1186440997627226624	,0,	2b3c71ca	16777215	1,25	6000		0		0		k-v	0
29495211		chat.bilibili.com	这是私人海滩吗人好少	1950.55500,1,25,16777215,1668525676,0,2b3c71ca,1186438378602806272,10	1668525676	1950.55500	1186438378602806272	,0,	2b3c71ca	16777215	1,25	6000		0		0		k-v	0
29495211		chat.bilibili.com	这个丈夫没有什么存在感啊	119.12400,1,25,16777215,1666319882,0,11051ca3,1167934841199914496,10	1666319882	119.12400	1167934841199914496	,0,	11051ca3	16777215	1,25	6000		0		0		k-v	0
29495211		chat.bilibili.com	管家开始安排行程？	347.62400,1,25,16777215,1665566962,0,2007b92,1161618885909556224,10	1665566962	347.62400	1161618885909556224	,0,	2007b92	16777215	1,25	6000		0		0		k-v	0
29495211		chat.bilibili.com	哇，这个黑皮金发小男孩镜头感真好，估计拍过不少广告了。	1848.03500,1,25,16777215,1662951708,0,1ba81b2d,1139680550030926848,10	1662951708	1848.03500	1139680550030926848	,0,	1ba81b2d	16777215	1,25	6000		0		0		k-v	0
29495211		chat.bilibili.com	她有个服装品牌叫“菲菲和朋友们”，在谈明天面试选童模拍模特照的事儿。	1644.22800,1,25,16777215,1662951470,0,1ba81b2d,1139678555202922496,10	1662951470	1644.22800	1139678555202922496	,0,	1ba81b2d	16777215	1,25	6000		0		0		k-v	0
29495211		chat.bilibili.com	有钱性格很难不好，脾气差的也是对外人，对家里人都很好	654.11100,1,25,16777215,1662949438,0,1ba81b2d,1139661509711197184,10	1662949438	654.11100	1139661509711197184	,0,	1ba81b2d	16777215	1,25	6000		0		0		k-v	0
29495211		chat.bilibili.com	祝福你们幸福美满，金钱富有	168.10400,1,25,16777215,1662549283,0,2d400d35,1136304765278371328,10	1662549283	168.10400	1136304765278371328	,0,	2d400d35	16777215	1,25	6000		0		0		k-v	0
29495211		chat.bilibili.com	街景房子风格明显是伦敦啊	1990.62500,1,25,16777215,1661375977,0,4d1f2a43,1126462362338077696,10	1661375977	1990.62500	1126462362338077696	,0,	4d1f2a43	16777215	1,25	6000		0		0		k-v	0
29495211		chat.bilibili.com	她们住伦敦好吗	1929.26100,1,25,16777215,1661375916,0,4d1f2a43,1126461847604668416,10	1661375916	1929.26100	1126461847604668416	,0,	4d1f2a43	16777215	1,25	6000		0		0		k-v	0
29495211		chat.bilibili.com	这么明显的英音还有人说美国	1378.63100,1,25,16777215,1661375365,0,4d1f2a43,1126457226932881408,10	1661375365	1378.63100	1126457226932881408	,0,	4d1f2a43	16777215	1,25	6000		0		0		k-v	0
29495211		chat.bilibili.com	英国，她是英国人啊	1353.16700,1,25,16777215,1661375340,0,4d1f2a43,1126457011941509888,10	1661375340	1353.16700	1126457011941509888	,0,	4d1f2a43	16777215	1,25	6000		0		0		k-v	0
29495211		chat.bilibili.com	像adele	1198.36400,1,25,16777215,1657284928,0,544e4545,1092144153049197312,10	1657284928	1198.36400	1092144153049197312	,0,	544e4545	16777215	1,25	6000		0		0		k-v	0
29495211		chat.bilibili.com	听不懂但是想看	239.52300,1,25,16777215,1653297225,0,db7da7e3,1058692873102312960,10	1653297225	239.52300	1058692873102312960	,0,	db7da7e3	16777215	1,25	6000		0		0		k-v	0
29495211		chat.bilibili.com	我的人活的不如狗	439.29200,1,25,16777215,1652002655,0,76cafd37,1047833233833620992,10	1652002655	439.29200	1047833233833620992	,0,	76cafd37	16777215	1,25	6000		0		0		k-v	0
29495211		chat.bilibili.com	downton？？	367.34900,1,25,16777215,1649328128,0,b1c4bd1,1025397676184710656,10	1649328128	367.34900	1025397676184710656	,0,	b1c4bd1	16777215	1,25	6000		0		0		k-v	0
29495211		chat.bilibili.com	我也不喜欢	725.27200,1,25,16777215,1648865417,0,15b534ac,1021516173512507392,10	1648865417	725.27200	1021516173512507392	,0,	15b534ac	16777215	1,25	6000		0		0		k-v	0
29495211		chat.bilibili.com	外国人喜欢曲线身材的	1219.00000,1,25,16777215,1640139569,0,dd1e0496,59269903609961472,10	1640139569	1219.00000	59269903609961472	,0,	dd1e0496	16777215	1,25	6000		0		0		k-v	0
29495211		chat.bilibili.com	英国人拍马屁真是一流	1118.02300,1,25,16777215,1640139444,0,dd1e0496,59269838161201664,10	1640139444	1118.02300	59269838161201664	,0,	dd1e0496	16777215	1,25	6000		0		0		k-v	0
29495211		chat.bilibili.com	我居然全听懂了	216.14500,1,25,16777215,1640138395,0,dd1e0496,59269287966926848,10	1640138395	216.14500	59269287966926848	,0,	dd1e0496	16777215	1,25	6000		0		0		k-v	0
29495211		chat.bilibili.com	看到了在这上高中的时候常坐的22路…	74.54400,1,25,16777215,1639570473,0,b0f3464e,58971533110094848,10	1639570473	74.54400	58971533110094848	,0,	b0f3464e	16777215	1,25	6000		0		0		k-v	0
29495211		chat.bilibili.com	感谢字幕君！！！！辛苦啦	18.66300,1,25,16777215,1633595391,0,e14b2211,55838869539055616,10	1633595391	18.66300	55838869539055616	,0,	e14b2211	16777215	1,25	6000		0		0		k-v	0
29495211		chat.bilibili.com	哈哈哈，这女的笑得真的好勉强	1750.56800,1,25,16777215,1633322316,0,424229df,55695699687930368,10	1633322316	1750.56800	55695699687930368	,0,	424229df	16777215	1,25	6000		0		0		k-v	0
29495211		chat.bilibili.com	全妆	116.07300,1,25,16777215,1633147172,0,424229df,55603873667864576,10	1633147172	116.07300	55603873667864576	,0,	424229df	16777215	1,25	6000		0		0		k-v	0
29495211		chat.bilibili.com	妈妈真的很好看诶	2570.51300,1,25,16777215,1629363270,0,efa8a2f0,53620019379069440,10	1629363270	2570.51300	53620019379069440	,0,	efa8a2f0	16777215	1,25	6000		0		0		k-v	0
29495211		chat.bilibili.com	弹幕护体	1170.86800,1,25,16777215,1628243079,0,345a498f,53032716470263808,10	1628243079	1170.86800	53032716470263808	,0,	345a498f	16777215	1,25	6000		0		0		k-v	0
29495211		chat.bilibili.com	妈妈挺好看的 也就肚子有肉 胳膊有点 还是生完孩子以后	2325.87800,1,25,16777215,1628191129,0,1ec76701,53005479798826496,10	1628191129	2325.87800	53005479798826496	,0,	1ec76701	16777215	1,25	6000		0		0		k-v	0
29495211		chat.bilibili.com	就和给古代皇子公主选读伴一样	1877.04800,1,25,16777215,1628190605,0,1ec76701,53005205102399488,10	1628190605	1877.04800	53005205102399488	,0,	1ec76701	16777215	1,25	6000		0		0		k-v	0
29495211		chat.bilibili.com	看到凡士林护手霜来	1323.05900,1,25,16777215,1623976015,0,102f7d44,50768820603191301,10	1623976015	1323.05900	50768820603191301	,0,	102f7d44	16777215	1,25	6000		0		0		k-v	0
29495211		chat.bilibili.com	有钱当然可以天真无邪	1953.92200,1,25,16777215,1622683136,0,8abd9695,50090979425255427,10	1622683136	1953.92200	50090979425255427	,0,	8abd9695	16777215	1,25	6000		0		0		k-v	0
29495211		chat.bilibili.com	怎么开翻译软件	1173.45900,1,25,16777215,1617289904,0,19db84da,47263373044744199,10	1617289904	1173.45900	47263373044744199	,0,	19db84da	16777215	1,25	6000		0		0		k-v	0
29495211		chat.bilibili.com	连英文字幕都没有	268.13500,1,25,16777215,1617288990,0,19db84da,47262893426606087,10	1617288990	268.13500	47262893426606087	,0,	19db84da	16777215	1,25	6000		0		0		k-v	0
29495211		chat.bilibili.com	我的翻译君呢？	256.52400,1,25,16777215,1617288962,0,19db84da,47262878878662661,10	1617288962	256.52400	47262878878662661	,0,	19db84da	16777215	1,25	6000		0		0		k-v	0
29495211		chat.bilibili.com	没有翻译？	21.72500,1,25,16777215,1617288719,0,19db84da,47262751440502787,10	1617288719	21.72500	47262751440502787	,0,	19db84da	16777215	1,25	6000		0		0		k-v	0
29495211		chat.bilibili.com	前面的笑死怎么还没笑死，别人说一句就急了，有点舔	535.86700,1,25,16777215,1616846636,0,7de9cf75,47030972888645639,10	1616846636	535.86700	47030972888645639	,0,	7de9cf75	16777215	1,25	6000		0		0		k-v	0
29495211		chat.bilibili.com	下一集再见	2701.93700,1,25,16777215,1614321930,0,920a078,45707299773743109,10	1614321930	2701.93700	45707299773743109	,0,	920a078	16777215	1,25	6000		0		0		k-v	0
29495211		chat.bilibili.com	有教养啊	2688.96200,1,25,16777215,1614321917,0,920a078,45707292999417863,10	1614321917	2688.96200	45707292999417863	,0,	920a078	16777215	1,25	6000		0		0		k-v	0
29495211		chat.bilibili.com	他们有二胎了	2663.75100,1,25,16777215,1614321892,0,920a078,45707279771631619,10	1614321892	2663.75100	45707279771631619	,0,	920a078	16777215	1,25	6000		0		0		k-v	0
29495211		chat.bilibili.com	哈啊哈吐槽打呼噜	2574.44300,1,25,16777215,1614321803,0,920a078,45707232951664643,10	1614321803	2574.44300	45707232951664643	,0,	920a078	16777215	1,25	6000		0		0		k-v	0
29495211		chat.bilibili.com	马里布	2560.26700,1,25,16777215,1614321789,0,920a078,45707225496289285,10	1614321789	2560.26700	45707225496289285	,0,	920a078	16777215	1,25	6000		0		0		k-v	0
29495211		chat.bilibili.com	她的鼻子微调过吗	1321.56500,1,25,16777215,1614321166,0,920a078,45706898827116549,10	1614321166	1321.56500	45706898827116549	,0,	920a078	16777215	1,25	6000		0		0		k-v	0
29495211		chat.bilibili.com	她很charming	1236.88400,1,25,16777215,1614321081,0,920a078,45706854441943043,10	1614321081	1236.88400	45706854441943043	,0,	920a078	16777215	1,25	6000		0		0		k-v	0
29495211		chat.bilibili.com	丰满而已啦	1220.15300,1,25,16777215,1614321064,0,920a078,45706845656973381,10	1614321064	1220.15300	45706845656973381	,0,	920a078	16777215	1,25	6000		0		0		k-v	0
29495211		chat.bilibili.com	很好看呢	1154.49500,1,25,16777215,1614320998,0,920a078,45706811232223237,10	1614320998	1154.49500	45706811232223237	,0,	920a078	16777215	1,25	6000		0		0		k-v	0
29495211		chat.bilibili.com	有钱人也很努力	1142.02400,1,25,16777215,1614320986,0,920a078,45706804694876165,10	1614320986	1142.02400	45706804694876165	,0,	920a078	16777215	1,25	6000		0		0		k-v	0
29495211		chat.bilibili.com	当你足够有钱 大家对你都是赞美	1125.73000,1,25,16777215,1614320970,0,920a078,45706796168380423,10	1614320970	1125.73000	45706796168380423	,0,	920a078	16777215	1,25	6000		0		0		k-v	0
29495211		chat.bilibili.com	这是他的艺术馆	1076.18700,1,25,16777215,1614320920,0,920a078,45706770178899973,10	1614320920	1076.18700	45706770178899973	,0,	920a078	16777215	1,25	6000		0		0		k-v	0
29495211		chat.bilibili.com	同款地垫	979.86000,1,25,16777215,1614320824,0,920a078,45706719687344135,10	1614320824	979.86000	45706719687344135	,0,	920a078	16777215	1,25	6000		0		0		k-v	0
29495211		chat.bilibili.com	因为维秘down to earth	913.93100,1,25,16777215,1614320758,0,920a078,45706685121036291,10	1614320758	913.93100	45706685121036291	,0,	920a078	16777215	1,25	6000		0		0		k-v	0
29495211		chat.bilibili.com	喜欢她的唇膏	880.38800,1,25,16777215,1614320724,0,920a078,45706667534319623,10	1614320724	880.38800	45706667534319623	,0,	920a078	16777215	1,25	6000		0		0		k-v	0
29495211		chat.bilibili.com	她笑起来好迷人	869.80600,1,25,16777215,1614320714,0,920a078,45706661974245381,10	1614320714	869.80600	45706661974245381	,0,	920a078	16777215	1,25	6000		0		0		k-v	0
29495211		chat.bilibili.com	是传送门小姐姐吗！好眼熟	1620.23600,1,25,16777215,1611574585,0,59d34d03,44266899448004611,10	1611574585	1620.23600	44266899448004611	,0,	59d34d03	16777215	1,25	6000		0		0		k-v	0
29495211		chat.bilibili.com	我飘了，竟然敢点开视频。。	82.49900,1,25,16777215,1609155268,0,60aab754,42998480901242883,10	1609155268	82.49900	42998480901242883	,0,	60aab754	16777215	1,25	6000		0		0		k-v	0
29495211		chat.bilibili.com	是她以女儿名字创的儿童品牌叫“fifi和她的朋友”要为拍摄选小模特	1785.89500,1,25,16777215,1606616002,0,b92f8162,41667174168264709,10	1606616002	1785.89500	41667174168264709	,0,	b92f8162	16777215	1,25	6000		0		0		k-v	0
29495211		chat.bilibili.com	人家女孩的小伙伴非富即贵，跟你的童年流程一样的，就是玩的不同懂吗	614.24800,1,25,16777215,1602630164,0,55aa7a3a,39577446874349571,10	1602630164	614.24800	39577446874349571	,0,	55aa7a3a	16777215	1,25	6000		0		0		k-v	0
29495211		chat.bilibili.com	居然有人担心女孩没玩伴，	522.84900,1,25,16777215,1602629921,0,55aa7a3a,39577319844610051,10	1602629921	522.84900	39577319844610051	,0,	55aa7a3a	16777215	1,25	6000		0		0		k-v	0
29495211		chat.bilibili.com	不是都说了是campaign嘛……	2353.61800,1,25,16777215,1602515615,0,3e69258d,39517390571569155,10	1602515615	2353.61800	39517390571569155	,0,	3e69258d	16777215	1,25	6000		0		0		k-v	0
29495211		chat.bilibili.com	前面美国的 女主家是英国人lol	1336.09900,1,25,16777215,1602354795,0,2632eae0,39433074299633671,10	1602354795	1336.09900	39433074299633671	,0,	2632eae0	16777215	1,25	6000		0		0		k-v	0
29495211		chat.bilibili.com	很真实啊 选品牌模特有什么奇怪的么	1886.07000,1,25,16777215,1602220872,0,c08f18a4,39362860419121159,10	1602220872	1886.07000	39362860419121159	,0,	c08f18a4	16777215	1,25	6000		0		0		k-v	0
29495211		chat.bilibili.com	弹幕可真酸	1676.83700,1,25,16777215,1602220623,0,c08f18a4,39362729853059075,10	1602220623	1676.83700	39362729853059075	,0,	c08f18a4	16777215	1,25	6000		0		0		k-v	0
29495211		chat.bilibili.com	????	604.94600,1,25,16777215,1602220091,0,322640dc,39362450855297027,10	1602220091	604.94600	39362450855297027	,0,	322640dc	16777215	1,25	6000		0		0		k-v	0
29495211		chat.bilibili.com	very stress out	2636.40200,1,25,16777215,1602173743,0,25f56223,39338151036583943,10	1602173743	2636.40200	39338151036583943	,0,	25f56223	16777215	1,25	6000		0		0		k-v	0
29495211		chat.bilibili.com	画廊开幕礼	2625.90600,1,25,16777215,1602173733,0,25f56223,39338145525268485,10	1602173733	2625.90600	39338145525268485	,0,	25f56223	16777215	1,25	6000		0		0		k-v	0
29495211		chat.bilibili.com	是为了产品拍的	2428.56400,1,25,16777215,1602173535,0,25f56223,39338042062798853,10	1602173535	2428.56400	39338042062798853	,0,	25f56223	16777215	1,25	6000		0		0		k-v	0
29495211		chat.bilibili.com	有木有带全字幕的版本啊	1456.04200,1,25,16777215,1602103816,0,33f372c6,39301488934649863,10	1602103816	1456.04200	39301488934649863	,0,	33f372c6	16777215	1,25	6000		0		0		k-v	0
29495211		chat.bilibili.com	吃neinei的三岁小可爱	1332.22500,1,25,16777215,1602103674,0,33f372c6,39301414696517635,10	1602103674	1332.22500	39301414696517635	,0,	33f372c6	16777215	1,25	6000		0		0		k-v	0
29495211		chat.bilibili.com	英文盲 太需要要标准字幕了 5555555	718.03600,1,25,16777215,1602103011,0,33f372c6,39301067193188359,10	1602103011	718.03600	39301067193188359	,0,	33f372c6	16777215	1,25	6000		0		0		k-v	0
29495211		chat.bilibili.com	有錢有閑，每天陪着自己的娃必然美滋滋啊	2008.99900,1,25,16777215,1602085421,0,16e37a25,39291844646928387,10	1602085421	2008.99900	39291844646928387	,0,	16e37a25	16777215	1,25	6000		0		0		k-v	0
29495211		chat.bilibili.com	VS睡衣	1297.92800,1,25,16777215,1602084710,0,16e37a25,39291471857188871,10	1602084710	1297.92800	39291471857188871	,0,	16e37a25	16777215	1,25	6000		0		0		k-v	0
29495211		chat.bilibili.com	弹幕听力悲伤	1844.48500,1,25,16777215,1601897389,0,56a04e6d,39193262049198085,10	1601897389	1844.48500	39193262049198085	,0,	56a04e6d	16777215	1,25	6000		0		0		k-v	0
29495211		chat.bilibili.com	妈呀刚刚那个down to earth是预告好吗 这么酸	763.68900,1,25,16777215,1601896426,0,56a04e6d,39192757167718403,10	1601896426	763.68900	39192757167718403	,0,	56a04e6d	16777215	1,25	6000		0		0		k-v	0
29495211		chat.bilibili.com	听不懂的弹幕就别胡乱猜测	2643.62500,1,25,16777215,1601397851,0,10714197,38931360037470211,10	1601397851	2643.62500	38931360037470211	,0,	10714197	16777215	1,25	6000		0		0		k-v	0
29495211		chat.bilibili.com	都是妈妈在带娃	2635.84300,1,25,16777215,1601269618,0,31dcff45,38864128834535431,10	1601269618	2635.84300	38864128834535431	,0,	31dcff45	16777215	1,25	6000		0		0		k-v	0
29495211		chat.bilibili.com	先刷牙再吃饭和先吃饭再刷牙效果都是一样的，只不过个人习惯不一样	129.28300,1,25,16777215,1600834861,0,addffdaa,38636191277907973,10	1600834861	129.28300	38636191277907973	,0,	addffdaa	16777215	1,25	6000		0		0		k-v	0
29495211		chat.bilibili.com	植物人的生活	368.53700,1,25,16777215,1600751675,0,2b3c81e1,38592577569554437,10	1600751675	368.53700	38592577569554437	,0,	2b3c81e1	16777215	1,25	6000		0		0		k-v	0
29495211		chat.bilibili.com	没时间陪家人可能因为不够有钱	2003.58400,1,25,16777215,1600493294,0,cb5f36cd,38457111745134595,10	1600493294	2003.58400	38457111745134595	,0,	cb5f36cd	16777215	1,25	6000		0		0		k-v	0
29495211		chat.bilibili.com	想想以前的皇帝怎么过得~	862.61300,1,25,16777215,1600492119,0,cb5f36cd,38456495642771463,10	1600492119	862.61300	38456495642771463	,0,	cb5f36cd	16777215	1,25	6000		0		0		k-v	0
29495211		chat.bilibili.com	好了好了大家都几十岁以上的人了别酸了	598.49600,1,25,16777215,1599391091,0,b644589f,37879240149434375,10	1599391091	598.49600	37879240149434375	,0,	b644589f	16777215	1,25	6000		0		0		k-v	0
29495211		chat.bilibili.com	小孩你裤子太长了	976.29100,1,25,16776960,1598454282,0,7860a58a,37388082410946567,10	1598454282	976.29100	37388082410946567	,0,	7860a58a	16776960	1,25	6000		0		0		k-v	0
29495211		chat.bilibili.com	Jay是做什么的	562.03700,1,25,16777215,1598093332,0,398044d,37198840674648135,10	1598093332	562.03700	37198840674648135	,0,	398044d	16777215	1,25	6000		0		0		k-v	0
29495211		chat.bilibili.com	这是几岁了还母乳？	1340.33800,1,25,16777215,1597718854,0,4d6ba349,37002506178920453,10	1597718854	1340.33800	37002506178920453	,0,	4d6ba349	16777215	1,25	6000		0		0		k-v	0
29495211		chat.bilibili.com	穿的可能是只在室内穿的鞋吧	475.87500,1,25,16777215,1597714063,0,37307ccd,36999994332413959,10	1597714063	475.87500	36999994332413959	,0,	37307ccd	16777215	1,25	6000		0		0		k-v	0
29495211		chat.bilibili.com	你们能不能别曲解她们意思啊	2345.42400,1,25,16777215,1596418258,0,b249a334,36320619456888835,10	1596418258	2345.42400	36320619456888835	,0,	b249a334	16777215	1,25	6000		0		0		k-v	0
29495211		chat.bilibili.com	没有啊	2163.44300,1,25,16777215,1596418076,0,b249a334,36320524111446019,10	1596418076	2163.44300	36320524111446019	,0,	b249a334	16777215	1,25	6000		0		0		k-v	0
29495211		chat.bilibili.com	笑声好魔性哈哈哈哈哈哈哈哈哈可爱	1434.04500,1,25,16777215,1596386122,0,b249a334,36303770664042499,10	1596386122	1434.04500	36303770664042499	,0,	b249a334	16777215	1,25	6000		0		0		k-v	0
29495211		chat.bilibili.com	再说了女主身材在美国很好了	1329.06800,1,25,16777215,1596386017,0,b249a334,36303715875422215,10	1596386017	1329.06800	36303715875422215	,0,	b249a334	16777215	1,25	6000		0		0		k-v	0
29495211		chat.bilibili.com	这是美国啊，不是中国，审美不一样的	1311.06800,1,25,16777215,1596385999,0,b249a334,36303706181861383,10	1596385999	1311.06800	36303706181861383	,0,	b249a334	16777215	1,25	6000		0		0		k-v	0
29495211		chat.bilibili.com	牙刷我有！	1278.06800,1,25,16777215,1596385966,0,b249a334,36303688884551683,10	1596385966	1278.06800	36303688884551683	,0,	b249a334	16777215	1,25	6000		0		0		k-v	0
29495211		chat.bilibili.com	有啊，多有意思，开阔一下眼界	1148.78900,1,25,16777215,1596385836,0,b249a334,36303620732354565,10	1596385836	1148.78900	36303620732354565	,0,	b249a334	16777215	1,25	6000		0		0		k-v	0
29495211		chat.bilibili.com	爸爸不喜欢纸杯蛋糕和蛋糕，不喜欢的话有点奇怪	721.60800,4,25,38979,1596370674,0,a3dc75e2,36295671562633221,10	1596370674	721.60800	36295671562633221	,0,	a3dc75e2	38979	4,25	6000		0		0		k-v	0
29495211		chat.bilibili.com	没有中文吗	28.35000,1,25,16777215,1596249873,0,ef93bee3,36232337224630279,10	1596249873	28.35000	36232337224630279	,0,	ef93bee3	16777215	1,25	6000		0		0		k-v	0
29495211		chat.bilibili.com	Jay：作为这个家里唯一的男性	167.86300,1,25,16777215,1595231576,0,f71a6014,35698456081203207,10	1595231576	167.86300	35698456081203207	,0,	f71a6014	16777215	1,25	6000		0		0		k-v	0
29495211		chat.bilibili.com	Jay：有时候是会挺难的	166.14500,1,25,16777215,1595231558,0,f71a6014,35698446907736069,10	1595231558	166.14500	35698446907736069	,0,	f71a6014	16777215	1,25	6000		0		0		k-v	0
29495211		chat.bilibili.com	也许变成个方形吧 某一天	140.12800,1,25,16777215,1595231186,0,f71a6014,35698251456839687,10	1595231186	140.12800	35698251456839687	,0,	f71a6014	16777215	1,25	6000		0		0		k-v	0
29495211		chat.bilibili.com	所以我们就保持三个人吧	138.86600,1,25,16777215,1595231149,0,f71a6014,35698232428331011,10	1595231149	138.86600	35698232428331011	,0,	f71a6014	16777215	1,25	6000		0		0		k-v	0
29495211		chat.bilibili.com	他们说三角形是最稳定的形状	134.72900,1,25,16777215,1595231121,0,f71a6014,35698217607233543,10	1595231121	134.72900	35698217607233543	,0,	f71a6014	16777215	1,25	6000		0		0		k-v	0
29495211		chat.bilibili.com	好担心洒出来 焦虑	126.32900,1,25,16777215,1595231082,0,f71a6014,35698197387018243,10	1595231082	126.32900	35698197387018243	,0,	f71a6014	16777215	1,25	6000		0		0		k-v	0
29495211		chat.bilibili.com	凡事我都会优先考虑我的家庭	116.86400,1,25,16777215,1595230952,0,f71a6014,35698128715251717,10	1595230952	116.86400	35698128715251717	,0,	f71a6014	16777215	1,25	6000		0		0		k-v	0
29495211		chat.bilibili.com	说她美的 兄弟们 人家有造型师啊	1252.40900,1,25,16777215,1594124700,0,3f6cfb13,35118134539059203,10	1594124700	1252.40900	35118134539059203	,0,	3f6cfb13	16777215	1,25	6000		0		0		k-v	0
29495211		chat.bilibili.com	属于重型榨汁机级别的	508.13200,1,25,16777215,1593943347,0,ccf7fbfd,35023053081542661,10	1593943347	508.13200	35023053081542661	,0,	ccf7fbfd	16777215	1,25	6000		0		0		k-v	0
29495211		chat.bilibili.com	这么大了还吃奶奶？	1330.24600,1,25,16777215,1592615328,0,a3ff68c7,34326788825415685,10	1592615328	1330.24600	34326788825415685	,0,	a3ff68c7	16777215	1,25	6000		0		0		k-v	0
29495211		chat.bilibili.com	真羡慕这小女孩，玩具应有尽有	695.00300,1,25,16777215,1590489548,0,12913136,33212267981963269,10	1590489548	695.00300	33212267981963269	,0,	12913136	16777215	1,25	6000		0		0		k-v	0
29495211		chat.bilibili.com	我想去他们家当管家。。。	439.01800,1,25,16777215,1590489280,0,12913136,33212127004590083,10	1590489280	439.01800	33212127004590083	,0,	12913136	16777215	1,25	6000		0		0		k-v	0
29495211		chat.bilibili.com	她闺女和她是怎么投的胎	45.84800,1,25,16777215,1590488621,0,12913136,33211781570101251,10	1590488621	45.84800	33211781570101251	,0,	12913136	16777215	1,25	6000		0		0		k-v	0
29495211		chat.bilibili.com	没字幕！	13.94300,1,25,16777215,1587238645,0,666b80bd,31507858320785413,10	1587238645	13.94300	31507858320785413	,0,	666b80bd	16777215	1,25	6000		0		0		k-v	0
29495211		chat.bilibili.com	贫穷的我竟然有胆量点进来	15.35900,1,25,16777215,1587012492,0,a03775a0,31389289211232259,10	1587012492	15.35900	31389289211232259	,0,	a03775a0	16777215	1,25	6000		0		0		k-v	0
29495211		chat.bilibili.com	有有有	1154.75000,1,25,16777215,1585022140,0,1e811afc,30345771538710533,10	1585022140	1154.75000	30345771538710533	,0,	1e811afc	16777215	1,25	6000		0		0		k-v	0
29495211		chat.bilibili.com	好的	63.57900,1,25,16777215,1584976628,0,a16e7502,30321910016376835,10	1584976628	63.57900	30321910016376835	,0,	a16e7502	16777215	1,25	6000		0		0		k-v	0
29495211		chat.bilibili.com	抖音来的，她家被偷了	18.25800,1,25,16777215,1583648756,0,84529412,29625722634502147,10	1583648756	18.25800	29625722634502147	,0,	84529412	16777215	1,25	6000		0		0		k-v	0
29495211		chat.bilibili.com	椰子 无力羡慕	507.08100,1,25,16777215,1582788649,0,343561d8,29174778978893827,10	1582788649	507.08100	29174778978893827	,0,	343561d8	16777215	1,25	6000		0		0		k-v	0
29495211		chat.bilibili.com	唐顿庄园？？？	382.47000,1,25,16777215,1582788462,0,343561d8,29174680992612359,10	1582788462	382.47000	29174680992612359	,0,	343561d8	16777215	1,25	6000		0		0		k-v	0
29495211		chat.bilibili.com	感谢翻译君	33.21200,1,25,16777215,1581924516,0,1c592eda,28721724461678596,10	1581924516	33.21200	28721724461678596	,0,	1c592eda	16777215	1,25	6000		0		0		k-v	0
29495211		chat.bilibili.com	不刷牙就开始喝了吗？	118.38200,1,25,16777215,1581580867,0,dbd8b761,28541552991141888,10	1581580867	118.38200	28541552991141888	,0,	dbd8b761	16777215	1,25	6000		0		0		k-v	0
29495211		chat.bilibili.com	完了，这孩子能不能成才啊	605.14300,1,25,16777215,1581326595,0,f585c5ee,28408241458249730,10	1581326595	605.14300	28408241458249730	,0,	f585c5ee	16777215	1,25	6000		0		0		k-v	0
29495211		chat.bilibili.com	当然	1322.29800,1,25,15138834,1581242529,0,8f66f406,28364166545276930,10	1581242529	1322.29800	28364166545276930	,0,	8f66f406	15138834	1,25	6000		0		0		k-v	0
29495211		chat.bilibili.com	还有人吗	1315.01600,1,25,16777215,1581167408,0,f1303426,28324781618626562,10	1581167408	1315.01600	28324781618626562	,0,	f1303426	16777215	1,25	6000		0		0		k-v	0
29495211		chat.bilibili.com	哈哈哈，我牙刷也是电动的	1299.53700,1,25,16777215,1581167387,0,f1303426,28324770610675716,10	1581167387	1299.53700	28324770610675716	,0,	f1303426	16777215	1,25	6000		0		0		k-v	0
29495211		chat.bilibili.com	未来我也要创造这样的生活	1159.73600,1,25,16777215,1581167213,0,f1303426,28324679621017600,10	1581167213	1159.73600	28324679621017600	,0,	f1303426	16777215	1,25	6000		0		0		k-v	0
29495211		chat.bilibili.com	有	1147.73700,1,25,16777215,1581167188,0,f1303426,28324666261110784,10	1581167188	1147.73700	28324666261110784	,0,	f1303426	16777215	1,25	6000		0		0		k-v	0
29495211		chat.bilibili.com	没有字幕君	119.81900,1,25,16777215,1580745253,0,db9b8384,28103450641301504,10	1580745253	119.81900	28103450641301504	,0,	db9b8384	16777215	1,25	6000		0		0		k-v	0
29495211		chat.bilibili.com	刚刚那个是金浴缸吗？震惊	367.95700,1,25,16777215,1578567184,0,e93db0b2,26961515406426114,10	1578567184	367.95700	26961515406426114	,0,	e93db0b2	16777215	1,25	6000		0		0		k-v	0
29495211		chat.bilibili.com	死亡芭比粉	259.39900,1,25,16777215,1578567039,0,e93db0b2,26961439470649344,10	1578567039	259.39900	26961439470649344	,0,	e93db0b2	16777215	1,25	6000		0		0		k-v	0
29495211		chat.bilibili.com	接地气？	675.35800,1,25,16777215,1577009758,0,f7caae18,26144975432974338,10	1577009758	675.35800	26144975432974338	,0,	f7caae18	16777215	1,25	6000		0		0		k-v	0
29495211		chat.bilibili.com	Jay很宠女儿的	572.72600,1,25,16777215,1577009638,0,f7caae18,26144912676749316,10	1577009638	572.72600	26144912676749316	,0,	f7caae18	16777215	1,25	6000		0		0		k-v	0
29495211		chat.bilibili.com	把所有衣服搭配好拍成照片	432.19900,1,25,16777215,1577009485,0,f7caae18,26144832519405568,10	1577009485	432.19900	26144832519405568	,0,	f7caae18	16777215	1,25	6000		0		0		k-v	0
29495211		chat.bilibili.com	kygo音乐	1590.11100,1,25,16777215,1577000906,0,5c0938d6,26140334585544708,10	1577000906	1590.11100	26140334585544708	,0,	5c0938d6	16777215	1,25	6000		0		0		k-v	0
29495211		chat.bilibili.com	问为什么不让真朋友来的弹幕 因为真朋友不一定能出镜 懂了吗？	2345.70400,1,25,16777215,1576939426,0,968efabf,26108101651857408,10	1576939426	2345.70400	26108101651857408	,0,	968efabf	16777215	1,25	6000		0		0		k-v	0
29495211		chat.bilibili.com	你们听力那么差看什么生肉啊？	2329.90000,1,25,16707842,1576907982,0,19e9531b,26091615525273602,10	1576907982	2329.90000	26091615525273602	,0,	19e9531b	16707842	1,25	6000		0		0		k-v	0
29495211		chat.bilibili.com	求你们了，去看有字幕版的吧，一个个听力那么差还曲解人家意思真的很讨厌	2310.48800,1,25,16707842,1576907941,0,19e9531b,26091594101817348,10	1576907941	2310.48800	26091594101817348	,0,	19e9531b	16707842	1,25	6000		0		0		k-v	0
29495211		chat.bilibili.com	觉得自己做什么都没意思的人才是真的应该好好找自己的原因吧	603.94800,1,25,16777215,1576840740,0,968efabf,26056361389326340,10	1576840740	603.94800	26056361389326340	,0,	968efabf	16777215	1,25	6000		0		0		k-v	0
29495211		chat.bilibili.com	弹幕真的好酸...这就和家里有个游泳池 有朋友来一起游 没人来就自己游一样好吗	603.94800,1,25,16777215,1576840719,0,968efabf,26056350625169412,10	1576840719	603.94800	26056350625169412	,0,	968efabf	16777215	1,25	6000		0		0		k-v	0
29495211		chat.bilibili.com	没有字幕！哎呦喂	30.36000,1,25,16777215,1576805522,0,7f5ad30c,26037897374203908,10	1576805522	30.36000	26037897374203908	,0,	7f5ad30c	16777215	1,25	6000		0		0		k-v	0
29495211		chat.bilibili.com	好	433.08100,1,25,16777215,1576739797,0,eb6a6152,26003438524956672,10	1576739797	433.08100	26003438524956672	,0,	eb6a6152	16777215	1,25	6000		0		0		k-v	0
29495211		chat.bilibili.com	Hey	21.72600,1,25,16777215,1576738791,0,eb6a6152,26002910733139968,10	1576738791	21.72600	26002910733139968	,0,	eb6a6152	16777215	1,25	6000		0		0		k-v	0
29495211		chat.bilibili.com	这种人的富有是建立在别人贫穷的基础上的	1220.27700,1,25,10546688,1576379751,0,2f659947,25814670249558016,10	1576379751	1220.27700	25814670249558016	,0,	2f659947	10546688	1,25	6000		0		0		k-v	0
29495211		chat.bilibili.com	实际上，社会的财富被这些人抢走了，他们是敌人	588.79400,1,25,16776960,1576379119,0,2f659947,25814339163258882,10	1576379119	588.79400	25814339163258882	,0,	2f659947	16776960	1,25	6000		0		0		k-v	0
29495211		chat.bilibili.com	我突然对佣人整个职业产生了好感	400.78100,1,25,16777215,1576378931,0,2f659947,25814240624902148,10	1576378931	400.78100	25814240624902148	,0,	2f659947	16777215	1,25	6000		0		0		k-v	0
29495211		chat.bilibili.com	别用自己的狭隘看别人好吗 不是所有人都觉得要多瘦才算美	1225.95000,1,25,16777215,1576357178,0,d7912281,25802835821068292,10	1576357178	1225.95000	25802835821068292	,0,	d7912281	16777215	1,25	6000		0		0		k-v	0
29495211		chat.bilibili.com	他们习惯先吃早餐再刷牙	134.26400,1,25,16777215,1575991302,0,fdae55ee,25611011403284480,9	1575991302	134.26400	25611011403284480	,0,	fdae55ee	16777215	1,25	6000		0		0		k-v	0
29495211		chat.bilibili.com	狗都比我家的胖	1426.66600,1,25,16777215,1575958339,0,bc4f5bf9,25593729337786370,9	1575958339	1426.66600	25593729337786370	,0,	bc4f5bf9	16777215	1,25	6000		0		0		k-v	0
29495211		chat.bilibili.com	假面就假面咯，我要有这么多钱我才不在乎	582.99800,1,25,16777215,1575875594,0,c536834,25550347122507778,9	1575875594	582.99800	25550347122507778	,0,	c536834	16777215	1,25	6000		0		0		k-v	0
29495211		chat.bilibili.com	有	1153.32000,1,25,16777215,1575522444,0,f971fbda,25365194706255872,9	1575522444	1153.32000	25365194706255872	,0,	f971fbda	16777215	1,25	6000		0		0		k-v	0
29495211		chat.bilibili.com	爱马仕出镜	366.41800,1,25,16777215,1575521607,0,f971fbda,25364755896598530,9	1575521607	366.41800	25364755896598530	,0,	f971fbda	16777215	1,25	6000		0		0		k-v	0
29495211		chat.bilibili.com	让我这么有钱就是真的花钱雇人陪我玩又怎么了？普通人身边塑料友谊少吗？别酸了	2344.62500,1,25,16777215,1575312968,0,9ec968ef,25255369115697154,9	1575312968	2344.62500	25255369115697154	,0,	9ec968ef	16777215	1,25	6000		0		0		k-v	0
29495211		chat.bilibili.com	弹幕真酸，小孩都攻击	2332.83200,1,25,16777215,1575312886,0,9ec968ef,25255326004019204,9	1575312886	2332.83200	25255326004019204	,0,	9ec968ef	16777215	1,25	6000		0		0		k-v	0
29495211		chat.bilibili.com	一家人颜值都高	2640.46900,1,25,16777215,1574948070,0,5d5aca72,25064057522880512,9	1574948070	2640.46900	25064057522880512	,0,	5d5aca72	16777215	1,25	6000		0		0		k-v	0
29495211		chat.bilibili.com	拍出来每个小朋友都好漂亮	2532.61000,1,25,16777215,1574947951,0,5d5aca72,25063995025129474,9	1574947951	2532.61000	25063995025129474	,0,	5d5aca72	16777215	1,25	6000		0		0		k-v	0
29495211		chat.bilibili.com	开翻译软件语音翻译很多能看懂	1164.69600,1,25,16777215,1574946561,0,5d5aca72,25063266133737474,9	1574946561	1164.69600	25063266133737474	,0,	5d5aca72	16777215	1,25	6000		0		0		k-v	0
29495211		chat.bilibili.com	掐着人中在看	127.49800,1,25,16777215,1574933426,0,53f1857b,25056379727773698,9	1574933426	127.49800	25056379727773698	,0,	53f1857b	16777215	1,25	6000		0		0		k-v	0
29495211		chat.bilibili.com	小朋友这一身好好看	1914.90100,1,25,16777215,1574917291,0,8dfcc4b5,25047920567910400,9	1574917291	1914.90100	25047920567910400	,0,	8dfcc4b5	16777215	1,25	6000		0		0		k-v	0
29495211		chat.bilibili.com	有	1150.10800,1,25,16777215,1574903843,0,34d5451a,25040869640896512,9	1574903843	1150.10800	25040869640896512	,0,	34d5451a	16777215	1,25	6000		0		0		k-v	0
29495211		chat.bilibili.com	生肉	8.57800,1,25,16777215,1574902696,0,34d5451a,25040268351766530,9	1574902696	8.57800	25040268351766530	,0,	34d5451a	16777215	1,25	6000		0		0		k-v	0
29495211		chat.bilibili.com	这么有钱，关于孩子的事情还全都亲力亲为，时刻全心陪伴，超棒了	755.59400,1,25,16777215,1574901600,0,4370c2b4,25039693642465280,9	1574901600	755.59400	25039693642465280	,0,	4370c2b4	16777215	1,25	6000		0		0		k-v	0
29495211		chat.bilibili.com	走那么远咖啡都凉了	92.50800,1,25,16777215,1574895302,0,5d61c64,25036391914143748,9	1574895302	92.50800	25036391914143748	,0,	5d61c64	16777215	1,25	6000		0		0		k-v	0
29495211		chat.bilibili.com	Hhh冷静	427.76900,1,25,16777215,1574872088,0,8dfcc4b5,25024220961439744,9	1574872088	427.76900	25024220961439744	,0,	8dfcc4b5	16777215	1,25	6000		0		0		k-v	0
29495211		chat.bilibili.com	女主人的脸有点发绿呀	1493.75500,1,25,16777215,1574861001,0,1e1239d1,25018408183529472,9	1574861001	1493.75500	25018408183529472	,0,	1e1239d1	16777215	1,25	6000		0		0		k-v	0
29495211		chat.bilibili.com	他们觉得不需要减肥呀	1215.44300,1,25,16777215,1574860798,0,1e1239d1,25018301572710400,9	1574860798	1215.44300	25018301572710400	,0,	1e1239d1	16777215	1,25	6000		0		0		k-v	0
29495211		chat.bilibili.com	他朋友好眼熟啊	2145.10300,1,25,16777215,1573975104,0,e01f361f,24553942992551938,9	1573975104	2145.10300	24553942992551938	,0,	e01f361f	16777215	1,25	6000		0		0		k-v	0
29495211		chat.bilibili.com	妈妈刚才说了三岁小孩不喜欢跟人分享啊 这都算性格不好？？	2374.52800,1,25,16777215,1572462042,0,71f41220,23760662650421252,9	1572462042	2374.52800	23760662650421252	,0,	71f41220	16777215	1,25	6000		0		0		k-v	0
29495211		chat.bilibili.com	fake个鬼……找童模拍广告都算fake？	2332.36100,1,25,16777215,1572461955,0,71f41220,23760617116008448,9	1572461955	2332.36100	23760617116008448	,0,	71f41220	16777215	1,25	6000		0		0		k-v	0
29495211		chat.bilibili.com	…………………他们说了好几次这是给自己的品牌拍照	2283.59900,1,25,16777215,1572461818,0,71f41220,23760545509277700,9	1572461818	2283.59900	23760545509277700	,0,	71f41220	16777215	1,25	6000		0		0		k-v	0
29495211		chat.bilibili.com	从小就开始network了	1002.24900,1,25,16777215,1572460385,0,71f41220,23759793872175108,9	1572460385	1002.24900	23759793872175108	,0,	71f41220	16777215	1,25	6000		0		0		k-v	0
29495211		chat.bilibili.com	人家一早起来弄完了再回去躺着陪孩子玩不行吗？一个个这么较劲…	133.93900,1,25,41194,1572416228,0,d0b826aa,23736642824044548,9	1572416228	133.93900	23736642824044548	,0,	d0b826aa	41194	1,25	6000		0		0		k-v	0
29495211		chat.bilibili.com	你要强调几遍down to earth啊	758.08500,1,25,16777215,1572341388,0,698ad42a,23697405087580162,9	1572341388	758.08500	23697405087580162	,0,	698ad42a	16777215	1,25	6000		0		0		k-v	0
29495211		chat.bilibili.com	最近有点瘦 所以需要膨胀一下	23.01400,1,25,16777215,1572267801,0,5e361fbb,23658824289746946,9	1572267801	23.01400	23658824289746946	,0,	5e361fbb	16777215	1,25	6000		0		0		k-v	0
29495211		chat.bilibili.com	不想看了，有钱人的生活太无聊了，我还是去搬砖吧	710.95500,1,25,16777215,1572263104,0,a5c17656,23656361799712770,9	1572263104	710.95500	23656361799712770	,0,	a5c17656	16777215	1,25	6000		0		0		k-v	0
29495211		chat.bilibili.com	狗遛人	1885.86000,1,25,16777215,1570938319,0,38f119d0,22961792911147012,9	1570938319	1885.86000	22961792911147012	,0,	38f119d0	16777215	1,25	6000		0		0		k-v	0
29495211		chat.bilibili.com	这是摄影师 还虚伪的阔太太，显露你的水平	1627.53400,1,25,16777215,1570938013,0,38f119d0,22961632569196544,9	1570938013	1627.53400	22961632569196544	,0,	38f119d0	16777215	1,25	6000		0		0		k-v	0
29495211		chat.bilibili.com	住城堡里	1259.65300,1,25,16777215,1570937803,0,38f119d0,22961522507513860,9	1570937803	1259.65300	22961522507513860	,0,	38f119d0	16777215	1,25	6000		0		0		k-v	0
29495211		chat.bilibili.com	好萌啊	1020.50100,1,25,16777215,1570937662,0,38f119d0,22961448338587650,9	1570937662	1020.50100	22961448338587650	,0,	38f119d0	16777215	1,25	6000		0		0		k-v	0
29495211		chat.bilibili.com	好可爱啊啊啊	811.53100,1,25,16777215,1570937409,0,38f119d0,22961315959537664,9	1570937409	811.53100	22961315959537664	,0,	38f119d0	16777215	1,25	6000		0		0		k-v	0
29495211		chat.bilibili.com	不习惯镜头的话肯定有一点的 酸什么啊	634.71200,1,25,16777215,1570937198,0,38f119d0,22961205206843396,9	1570937198	634.71200	22961205206843396	,0,	38f119d0	16777215	1,25	6000		0		0		k-v	0
29495211		chat.bilibili.com	好可爱	588.84000,1,25,16777215,1570937062,0,38f119d0,22961134000144386,9	1570937062	588.84000	22961134000144386	,0,	38f119d0	16777215	1,25	6000		0		0		k-v	0
29495211		chat.bilibili.com	穷	730.20300,1,25,16777215,1570342846,0,68bb342,22649593919438848,9	1570342846	730.20300	22649593919438848	,0,	68bb342	16777215	1,25	6000		0		0		k-v	0
29495211		chat.bilibili.com	劳斯莱斯古斯特	13.94100,1,25,16777215,1570284040,0,f791e175,22618762305339392,9	1570284040	13.94100	22618762305339392	,0,	f791e175	16777215	1,25	6000		0		0		k-v	0
29495211		chat.bilibili.com	穷人家的孩子才分享，富人喜欢再买一个	2426.90800,1,25,16777215,1570281753,0,8d03f6a5,22617563208351744,9	1570281753	2426.90800	22617563208351744	,0,	8d03f6a5	16777215	1,25	6000		0		0		k-v	0
29495211		chat.bilibili.com	得用， 你去告诉机长让他们滚下去	1736.50600,1,25,16777215,1570281062,0,8d03f6a5,22617201243062272,9	1570281062	1736.50600	22617201243062272	,0,	8d03f6a5	16777215	1,25	6000		0		0		k-v	0
29495211		chat.bilibili.com	飞机好小啊	1564.63800,1,25,16777215,1570280890,0,8d03f6a5,22617111100653568,9	1570280890	1564.63800	22617111100653568	,0,	8d03f6a5	16777215	1,25	6000		0		0		k-v	0
29495211		chat.bilibili.com	谁喜欢胖女人？你以为自己是唐玄宗吗	1284.28600,1,25,16777215,1570280609,0,8d03f6a5,22616963786211328,9	1570280609	1284.28600	22616963786211328	,0,	8d03f6a5	16777215	1,25	6000		0		0		k-v	0
29495211		chat.bilibili.com	还要自己去买东西，也不是很有钱啊，管家呢	90.41900,1,25,16777215,1570279434,0,8d03f6a5,22616347488288770,9	1570279434	90.41900	22616347488288770	,0,	8d03f6a5	16777215	1,25	6000		0		0		k-v	0
29495211		chat.bilibili.com	坚持不住了，回去搬砖了	1158.77900,1,25,16777215,1570265123,0,6e1d7fbb,22608844403769344,9	1570265123	1158.77900	22608844403769344	,0,	6e1d7fbb	16777215	1,25	6000		0		0		k-v	0
29495211		chat.bilibili.com	别说了，怎么应聘管家	400.14300,1,25,16777215,1570264736,0,6e1d7fbb,22608641284636672,9	1570264736	400.14300	22608641284636672	,0,	6e1d7fbb	16777215	1,25	6000		0		0		k-v	0
29495211		chat.bilibili.com	有钱人的快乐我果然想象不到	38.15700,1,25,16777215,1570179215,0,30624925,22563803629617154,9	1570179215	38.15700	22563803629617154	,0,	30624925	16777215	1,25	6000		0		0		k-v	0
29495211		chat.bilibili.com	什么生日？就是童装广告啊	2359.89800,1,25,16777215,1569129724,0,350abb0a,22013568290390018,9	1569129724	2359.89800	22013568290390018	,0,	350abb0a	16777215	1,25	6000		0		0		k-v	0
29495211		chat.bilibili.com	因为这是她的孩子	2115.54200,1,25,16777215,1567405228,0,d4f1f5e1,21109435885682692,9	1567405228	2115.54200	21109435885682692	,0,	d4f1f5e1	16777215	1,25	6000		0		0		k-v	0
29495211		chat.bilibili.com	但是我觉得女主妈妈很好看一点	1469.32000,1,25,16777215,1567363902,0,3884b22d,21087769243156482,9	1567363902	1469.32000	21087769243156482	,0,	3884b22d	16777215	1,25	6000		0		0		k-v	0
29495211		chat.bilibili.com	果然黑金组合最为商务人士青睐hhhhhh	1063.47000,1,25,16777215,1567363477,0,3884b22d,21087546478428164,9	1567363477	1063.47000	21087546478428164	,0,	3884b22d	16777215	1,25	6000		0		0		k-v	0
29495211		chat.bilibili.com	早茶服务哇哦	91.30000,1,25,16777215,1567362465,0,3884b22d,21087015517290500,9	1567362465	91.30000	21087015517290500	,0,	3884b22d	16777215	1,25	6000		0		0		k-v	0
29495211		chat.bilibili.com	我来找梦中素材	71.59900,1,25,16777215,1567362419,0,3884b22d,21086991289417728,9	1567362419	71.59900	21086991289417728	,0,	3884b22d	16777215	1,25	6000		0		0		k-v	0
29495211		chat.bilibili.com	有钱真好	73.82000,1,25,16777215,1567260919,0,15182329,21033776079437826,9	1567260919	73.82000	21033776079437826	,0,	15182329	16777215	1,25	6000		0		0		k-v	0
29495211		chat.bilibili.com	真好啊	2536.14700,1,25,16777215,1566317655,0,aa73e840,20539234301509636,9	1566317655	2536.14700	20539234301509636	,0,	aa73e840	16777215	1,25	6000		0		0		k-v	0
29495211		chat.bilibili.com	明明是两个小女孩吵架了	2387.04000,1,25,16777215,1566317501,0,aa73e840,20539153474125828,9	1566317501	2387.04000	20539153474125828	,0,	aa73e840	16777215	1,25	6000		0		0		k-v	0
29495211		chat.bilibili.com	说心酸的，太自卑了吧	2142.62900,1,25,16777215,1566317173,0,aa73e840,20538981607276546,9	1566317173	2142.62900	20538981607276546	,0,	aa73e840	16777215	1,25	6000		0		0		k-v	0
29495211		chat.bilibili.com	给菲菲面试朋友吧…	1841.06900,1,25,16777215,1566316843,0,aa73e840,20538808497340420,9	1566316843	1841.06900	20538808497340420	,0,	aa73e840	16777215	1,25	6000		0		0		k-v	0
29495211		chat.bilibili.com	万恶的资本主义	596.26100,1,25,16777215,1565964518,0,39be1b5d,20354088824209412,9	1565964518	596.26100	20354088824209412	,0,	39be1b5d	16777215	1,25	6000		0		0		k-v	0
29495211		chat.bilibili.com	卧槽	53.73000,1,25,16777215,1565866577,0,2bf975ad,20302739543687170,9	1565866577	53.73000	20302739543687170	,0,	2bf975ad	16777215	1,25	6000		0		0		k-v	0
29495211		chat.bilibili.com	饿了	69.17800,1,25,16777215,1565366544,0,54cf0ab0,20040578111111172,9	1565366544	69.17800	20040578111111172	,0,	54cf0ab0	16777215	1,25	6000		0		0		k-v	0
29495211		chat.bilibili.com	Malibu Miley Cyrus	2622.09400,1,25,16777215,1564305019,0,a3c3e38a,19484033632698370,9	1564305019	2622.09400	19484033632698370	,0,	a3c3e38a	16777215	1,25	6000		0		0		k-v	0
29495211		chat.bilibili.com	来了	13.60100,1,25,16777215,1564155760,0,ac5b81ad,19405778950029312,9	1564155760	13.60100	19405778950029312	,0,	ac5b81ad	16777215	1,25	6000		0		0		k-v	0
29495211		chat.bilibili.com	沾沾喜气	26.86900,1,25,16777215,1564118967,0,14215adf,19386488678514688,9	1564118967	26.86900	19386488678514688	,0,	14215adf	16777215	1,25	6000		0		0		k-v	0
29495211		chat.bilibili.com	赞赞	17.07800,1,25,16777215,1564118957,0,14215adf,19386483194462210,9	1564118957	17.07800	19386483194462210	,0,	14215adf	16777215	1,25	6000		0		0		k-v	0
29495211		chat.bilibili.com	这女孩好漂亮，长得就想洋娃娃一样。	746.84500,1,25,16777215,1564106840,0,8b180a5c,19380130643705860,9	1564106840	746.84500	19380130643705860	,0,	8b180a5c	16777215	1,25	6000		0		0		k-v	0
29495211		chat.bilibili.com	呀	10.70100,1,25,16777215,1564018788,0,c4d760f6,19333965753614338,9	1564018788	10.70100	19333965753614338	,0,	c4d760f6	16777215	1,25	6000		0		0		k-v	0
29495211		chat.bilibili.com	这是选朋友？？？？我打扰了	1793.04700,1,25,16777215,1563811543,0,53f69ba1,19225310124310528,9	1563811543	1793.04700	19225310124310528	,0,	53f69ba1	16777215	1,25	6000		0		0		k-v	0
29495211		chat.bilibili.com	我是个柠檬精	660.98700,1,25,16777215,1563805824,0,d5e88eb2,19222311648362498,9	1563805824	660.98700	19222311648362498	,0,	d5e88eb2	16777215	1,25	6000		0		0		k-v	0
29495211		chat.bilibili.com	emmmmm????听不懂	208.33400,1,25,16777215,1563805430,0,d5e88eb2,19222104732336132,9	1563805430	208.33400	19222104732336132	,0,	d5e88eb2	16777215	1,25	6000		0		0		k-v	0
29495211		chat.bilibili.com	掀眼镜那一下好像妮妮	86.43200,1,25,16777215,1563707433,0,17d3a694,19170726434045954,9	1563707433	86.43200	19170726434045954	,0,	17d3a694	16777215	1,25	6000		0		0		k-v	0
29495211		chat.bilibili.com	孩子可真会投胎	29.25700,1,25,16777215,1563558039,0,c2df9dd7,19092400775364612,9	1563558039	29.25700	19092400775364612	,0,	c2df9dd7	16777215	1,25	6000		0		0		k-v	0
29495211		chat.bilibili.com	我也是来看装修的	218.08100,1,25,16777215,1562857278,0,a0db0f41,18725000389853184,9	1562857278	218.08100	18725000389853184	,0,	a0db0f41	16777215	1,25	6000		0		0		k-v	0
29495211		chat.bilibili.com	多好阿，不用自己打扫卫生诶	329.65700,1,25,16777215,1562056911,0,9bc23a56,18305377536835586,9	1562056911	329.65700	18305377536835586	,0,	9bc23a56	16777215	1,25	6000		0		0		k-v	0
29495211		chat.bilibili.com	这男的也不帅啊，不过女主人真的很好看	137.15600,1,25,16777215,1560662581,0,24e06f8a,17574346624073730,9	1560662581	137.15600	17574346624073730	,0,	24e06f8a	16777215	1,25	6000		0		0		k-v	0
29495211		chat.bilibili.com	模拟人生潇洒的等等我哈哈哈	56.71600,1,25,16777215,1560662473,0,24e06f8a,17574290298765312,9	1560662473	56.71600	17574290298765312	,0,	24e06f8a	16777215	1,25	6000		0		0		k-v	0
29495211		chat.bilibili.com	承包空屏	1969.71300,1,25,16777215,1560299096,0,4484f5c4,17383775965544448,9	1560299096	1969.71300	17383775965544448	,0,	4484f5c4	16777215	1,25	6000		0		0		k-v	0
29495211		chat.bilibili.com	这还不是spoil吗？	601.15900,1,25,16777215,1560233281,0,4484f5c4,17349269856452610,9	1560233281	601.15900	17349269856452610	,0,	4484f5c4	16777215	1,25	6000		0		0		k-v	0
29495211		chat.bilibili.com	就像我总是在担心 她今天玩得尽兴吗 她有没有看iPad太长时间	1890.64300,4,25,16740868,1560171152,0,36fc72d,17316696483168258,9	1560171152	1890.64300	17316696483168258	,0,	36fc72d	16740868	4,25	6000		0		0		k-v	0
29495211		chat.bilibili.com	当然这也很值得也很珍贵	1888.12900,4,25,16740868,1560171039,0,36fc72d,17316637393289216,9	1560171039	1888.12900	17316637393289216	,0,	36fc72d	16740868	4,25	6000		0		0		k-v	0
29495211		chat.bilibili.com	我觉得当一个妈妈是很有挑战性的	1881.97700,4,25,16740868,1560170660,0,36fc72d,17316438479470592,9	1560170660	1881.97700	17316438479470592	,0,	36fc72d	16740868	4,25	6000		0		0		k-v	0
29495211		chat.bilibili.com	我会参考她的意见 但是我的话才是最终决定	1858.85100,4,25,16740868,1560170589,0,36fc72d,17316401369841664,9	1560170589	1858.85100	17316401369841664	,0,	36fc72d	16740868	4,25	6000		0		0		k-v	0
29495211		chat.bilibili.com	我相信fifi会有自己很坚定的选择 在让哪个孩子和她一起玩这件事上	1853.81500,4,25,16740868,1560170542,0,36fc72d,17316377009324032,9	1560170542	1853.81500	17316377009324032	,0,	36fc72d	16740868	4,25	6000		0		0		k-v	0
29495211		chat.bilibili.com	我确信fifi会有她自己很坚定的选择	1852.91900,1,25,16777215,1560170439,0,36fc72d,17316322739224576,9	1560170439	1852.91900	17316322739224576	,0,	36fc72d	16777215	1,25	6000		0		0		k-v	0		翻译修改（自我）
29495211		chat.bilibili.com	对 毕竟做过模特	1461.00200,1,25,16777215,1559038236,0,ae2bfa31,16722722528690176,9	1559038236	1461.00200	16722722528690176	,0,	ae2bfa31	16777215	1,25	6000		0		0		k-v	0
29495211		chat.bilibili.com	噢呐呐呐	1349.38000,1,25,16777215,1559009998,0,780ae66b,16707917698826242,9	1559009998	1349.38000	16707917698826242	,0,	780ae66b	16777215	1,25	6000		0		0		k-v	0
29495211		chat.bilibili.com	Things definitely turn around.	2478.61500,4,25,16777215,1558801905,0,97e0f950,16598816743489536,9	1558801905	2478.61500	16598816743489536	,0,	97e0f950	16777215	4,25	6000		0		0		k-v	0
29495211		chat.bilibili.com	feifei，can you turn around please?	2313.33500,4,25,16777215,1558801582,0,97e0f950,16598647626530816,9	1558801582	2313.33500	16598647626530816	,0,	97e0f950	16777215	4,25	6000		0		0		k-v	0
29495211		chat.bilibili.com	You say hello to your friend.	2270.81400,4,25,16777215,1558801455,0,97e0f950,16598581071314944,9	1558801455	2270.81400	16598581071314944	,0,	97e0f950	16777215	4,25	6000		0		0		k-v	0
29495211		chat.bilibili.com	Baby trying to sit down, okay.	2262.29500,4,25,16777215,1558801442,0,97e0f950,16598573799964674,9	1558801442	2262.29500	16598573799964674	,0,	97e0f950	16777215	4,25	6000		0		0		k-v	0
29495211		chat.bilibili.com	To be honestly they didn't do that great.	2201.86400,4,25,16777215,1558801261,0,97e0f950,16598479374647298,9	1558801261	2201.86400	16598479374647298	,0,	97e0f950	16777215	4,25	6000		0		0		k-v	0
29495211		chat.bilibili.com	My lucky numbers.	2181.34400,4,25,16777215,1558801233,0,97e0f950,16598464413564928,9	1558801233	2181.34400	16598464413564928	,0,	97e0f950	16777215	4,25	6000		0		0		k-v	0
29495211		chat.bilibili.com	I feel lucky this time.	2175.78400,4,25,16777215,1558801223,0,97e0f950,16598459302281216,9	1558801223	2175.78400	16598459302281216	,0,	97e0f950	16777215	4,25	6000		0		0		k-v	0
29495211		chat.bilibili.com	That's really important for relationships.	1336.19500,1,25,16777215,1558795517,0,97e0f950,16595467886919680,9	1558795517	1336.19500	16595467886919680	,0,	97e0f950	16777215	1,25	6000		0		0		k-v	0
29495211		chat.bilibili.com	I suppose her anything you want to do.	1325.29700,1,25,16777215,1558795507,0,97e0f950,16595462168510466,9	1558795507	1325.29700	16595462168510466	,0,	97e0f950	16777215	1,25	6000		0		0		k-v	0
29495211		chat.bilibili.com	To meeting rocky.	228.62700,1,25,16777215,1558791371,0,97e0f950,16593293734313984,9	1558791371	228.62700	16593293734313984	,0,	97e0f950	16777215	1,25	6000		0		0		k-v	0
29495211		chat.bilibili.com	You know the detail you know this happening.	214.03200,1,25,16777215,1558791356,0,97e0f950,16593286106447876,9	1558791356	214.03200	16593286106447876	,0,	97e0f950	16777215	1,25	6000		0		0		k-v	0
29495211		chat.bilibili.com	到底是什么让我看到了这里……	1332.14300,1,25,16777215,1558531429,0,8565dcb7,16457009721245700,9	1558531429	1332.14300	16457009721245700	,0,	8565dcb7	16777215	1,25	6000		0		0		k-v	0
29495211		chat.bilibili.com	现代版唐顿庄园	317.73500,1,25,16777215,1558443527,0,a109daae,16410923539365888,9	1558443527	317.73500	16410923539365888	,0,	a109daae	16777215	1,25	6000		0		0		k-v	0
29495211		chat.bilibili.com	什么都太假，看把你酸的	1781.98800,1,25,16777215,1557839620,0,5637dc26,16094302363451394,9	1557839620	1781.98800	16094302363451394	,0,	5637dc26	16777215	1,25	6000		0		0		k-v	0
29495211		chat.bilibili.com	名媛和公主病要搞清楚好伐	879.98000,1,25,16777215,1557839069,0,5637dc26,16094013603971074,9	1557839069	879.98000	16094013603971074	,0,	5637dc26	16777215	1,25	6000		0		0		k-v	0
29495211		chat.bilibili.com	反倒家里有钱的眼界和动手能力都挺强的	838.57800,1,25,16777215,1557838998,0,5637dc26,16093976017764354,9	1557838998	838.57800	16093976017764354	,0,	5637dc26	16777215	1,25	6000		0		0		k-v	0
29495211		chat.bilibili.com	家里本来就有矿和暴发户是两种人...	838.57800,1,25,16777215,1557838956,0,5637dc26,16093954041184258,9	1557838956	838.57800	16093954041184258	,0,	5637dc26	16777215	1,25	6000		0		0		k-v	0
29495211		chat.bilibili.com	人家的孩子是自己带的，知乎有说的	485.36800,1,25,16777215,1557838577,0,5637dc26,16093755526348802,9	1557838577	485.36800	16093755526348802	,0,	5637dc26	16777215	1,25	6000		0		0		k-v	0
29495211		chat.bilibili.com	小孩性格好好	2046.50100,1,25,16777215,1557552753,0,251329ce,15943901260021762,9	1557552753	2046.50100	15943901260021762	,0,	251329ce	16777215	1,25	6000		0		0		k-v	0
29495211		chat.bilibili.com	突然比弗利？	2006.96800,1,25,16777215,1557552708,0,251329ce,15943877656576002,9	1557552708	2006.96800	15943877656576002	,0,	251329ce	16777215	1,25	6000		0		0		k-v	0
29495211		chat.bilibili.com	这样真好 很多有钱人因为太忙都没办法陪家人的	1991.11000,1,25,16777215,1557552687,0,251329ce,15943866543243268,9	1557552687	1991.11000	15943866543243268	,0,	251329ce	16777215	1,25	6000		0		0		k-v	0
29495211		chat.bilibili.com	她好喜欢孩子啊 这样的人内心也很善良的吧	1777.69900,1,25,16777215,1557552467,0,251329ce,15943751380238338,9	1557552467	1777.69900	15943751380238338	,0,	251329ce	16777215	1,25	6000		0		0		k-v	0
29495211		chat.bilibili.com	电动牙刷没有镀金，喝得橙汁也是超市买的，心里有点平衡233333	1289.37000,1,25,16777215,1556979673,0,36e3759d,15643442402557956,9	1556979673	1289.37000	15643442402557956	,0,	36e3759d	16777215	1,25	6000		0		0		k-v	0
29495211		chat.bilibili.com	Alice	2393.79200,1,25,16777215,1556892937,0,4ef223d6,15597967677325314,9	1556892937	2393.79200	15597967677325314	,0,	4ef223d6	16777215	1,25	6000		0		0		k-v	0
29495211		chat.bilibili.com	玫红色。。	1674.91700,1,25,16777215,1556892210,0,4ef223d6,15597586648924164,9	1556892210	1674.91700	15597586648924164	,0,	4ef223d6	16777215	1,25	6000		0		0		k-v	0
29495211		chat.bilibili.com	有没有朋友不用我们担心的吧…	526.68400,1,25,16777215,1556882026,0,bcd2fc15,15592247437295618,9	1556882026	526.68400	15592247437295618	,0,	bcd2fc15	16777215	1,25	6000		0		0		k-v	0
29495211		chat.bilibili.com	感觉她人好好喔 就性格蛮不错	347.98700,1,25,16777215,1556881830,0,bcd2fc15,15592144477093892,9	1556881830	347.98700	15592144477093892	,0,	bcd2fc15	16777215	1,25	6000		0		0		k-v	0
29495211		chat.bilibili.com	好美呀	199.39700,1,25,16777215,1556881556,0,bcd2fc15,15592000719421442,9	1556881556	199.39700	15592000719421442	,0,	bcd2fc15	16777215	1,25	6000		0		0		k-v	0
29495211		chat.bilibili.com	妈妈这个造型好美	2563.98400,1,25,16777215,1556848671,0,4caee335,15574759797424132,9	1556848671	2563.98400	15574759797424132	,0,	4caee335	16777215	1,25	6000		0		0		k-v	0
29495211		chat.bilibili.com	有	1151.62000,1,25,16777215,1556708115,0,81aa15f3,15501067995840516,9	1556708115	1151.62000	15501067995840516	,0,	81aa15f3	16777215	1,25	6000		0		0		k-v	0
29495211		chat.bilibili.com	但我觉得我有时候做的不好	604.55300,4,25,16777215,1556664163,0,b985e5b7,15478024256356352,9	1556664163	604.55300	15478024256356352	,0,	b985e5b7	16777215	4,25	6000		0		0		k-v	0
29495211		chat.bilibili.com	我们的婚礼有三天	265.84500,4,25,16777215,1556663761,0,b985e5b7,15477813549203460,9	1556663761	265.84500	15477813549203460	,0,	b985e5b7	16777215	4,25	6000		0		0		k-v	0
29495211		chat.bilibili.com	菲菲呦菲菲	206.56400,4,25,16777215,1556663666,0,b985e5b7,15477763783786496,9	1556663666	206.56400	15477763783786496	,0,	b985e5b7	16777215	4,25	6000		0		0		k-v	0
29495211		chat.bilibili.com	来长见识	8.55700,1,25,16777215,1556641428,0,fcf68e9c,15466104721768452,9	1556641428	8.55700	15466104721768452	,0,	fcf68e9c	16777215	1,25	6000		0		0		k-v	0
29495211		chat.bilibili.com	竟然来看这	17.85900,1,25,16777215,1556298802,0,fb991a65,15286469955944448,9	1556298802	17.85900	15286469955944448	,0,	fb991a65	16777215	1,25	6000		0		0		k-v	0
29495211		chat.bilibili.com	我飘了	5.53300,1,25,16777215,1556298787,0,fb991a65,15286462165024768,9	1556298787	5.53300	15286462165024768	,0,	fb991a65	16777215	1,25	6000		0		0		k-v	0
29495211		chat.bilibili.com	她真的很好	538.16900,1,25,16777215,1556175772,0,f0f800a2,15221966750351362,9	1556175772	538.16900	15221966750351362	,0,	f0f800a2	16777215	1,25	6000		0		0		k-v	0
29495211		chat.bilibili.com	她本人买东西非常喜欢使用现金	139.96900,1,25,16777215,1556175357,0,f0f800a2,15221748959543300,9	1556175357	139.96900	15221748959543300	,0,	f0f800a2	16777215	1,25	6000		0		0		k-v	0
29495211		chat.bilibili.com	世界真不公平	183.13700,1,25,16777215,1556006944,0,11f20183,15133452300976130,9	1556006944	183.13700	15133452300976130	,0,	11f20183	16777215	1,25	6000		0		0		k-v	0
29495211		chat.bilibili.com	起床带妆系列	102.91000,1,25,16777215,1555677103,0,aeec9c33,14960520341225474,9	1555677103	102.91000	14960520341225474	,0,	aeec9c33	16777215	1,25	6000		0		0		k-v	0
29495211		chat.bilibili.com	狗我都开始羡慕了	231.87400,1,25,16777215,1555583006,0,4791e228,14911186811748356,9	1555583006	231.87400	14911186811748356	,0,	4791e228	16777215	1,25	6000		0		0		k-v	0
29495211		chat.bilibili.com	胖不胖的，她以前是模特，身材确实和现在不同。但是不当模特没有必要维持骨感身材也是个人选择。而且人家有选择！	1244.04700,1,25,16777215,1555557050,0,d536796d,14897578250862596,9	1555557050	1244.04700	14897578250862596	,0,	d536796d	16777215	1,25	6000		0		0		k-v	0
29495211		chat.bilibili.com	爸爸是F1老板，女儿自己也有事业，自己的资产大概26E了解一下？	941.25500,1,25,16777215,1555554175,0,d536796d,14896070771343364,9	1555554175	941.25500	14896070771343364	,0,	d536796d	16777215	1,25	6000		0		0		k-v	0
29495211		chat.bilibili.com	你们去看看隔壁《有钱人生》就知道他们的烦恼啦	883.64400,1,25,16777215,1555554117,0,d536796d,14896040567111684,9	1555554117	883.64400	14896040567111684	,0,	d536796d	16777215	1,25	6000		0		0		k-v	0
29495211		chat.bilibili.com	刚在隔壁节目看到了女主人tamara镶满施华洛世奇的浴缸	461.95400,1,25,16777215,1555553649,0,d536796d,14895795108052992,9	1555553649	461.95400	14895795108052992	,0,	d536796d	16777215	1,25	6000		0		0		k-v	0
29495211		chat.bilibili.com	沙发靠枕都是香奶奶的……	1023.53600,1,25,16777215,1555552939,0,e8f1bd5c,14895423150358528,9	1555552939	1023.53600	14895423150358528	,0,	e8f1bd5c	16777215	1,25	6000		0		0		k-v	0
29495211		chat.bilibili.com	酸酸酸酸酸酸酸酸	24.87200,1,25,16777215,1554220650,0,1785cd87,14196919866228738,9	1554220650	24.87200	14196919866228738	,0,	1785cd87	16777215	1,25	6000		0		0		k-v	0
29495211		chat.bilibili.com	F1老板女儿	341.86100,1,25,16777215,1553967923,0,69af9cdf,14064418003877892,9	1553967923	341.86100	14064418003877892	,0,	69af9cdf	16777215	1,25	6000		0		0		k-v	0
29495211		chat.bilibili.com	管家既然批着头发	361.97600,1,25,16777215,1553863274,0,8f798ecb,14009551746498564,9	1553863274	361.97600	14009551746498564	,0,	8f798ecb	16777215	1,25	6000		0		0		k-v	0
29495211		chat.bilibili.com	我觉得你们酸的更尴尬，先看看自己吧，别说找这样的对象了，自己都成不了男/女主人	633.38600,1,25,16777215,1553765494,0,87dcd610,13958287019999236,9	1553765494	633.38600	13958287019999236	,0,	87dcd610	16777215	1,25	6000		0		0		k-v	0
29495211		chat.bilibili.com	她会在自己家迷路吧	760.22700,1,25,16777215,1552874874,0,2eb425c1,13491345843290114,9	1552874874	760.22700	13491345843290114	,0,	2eb425c1	16777215	1,25	6000		0		0		k-v	0
29495211		chat.bilibili.com	哇	33.00000,1,25,16777215,1552456115,0,9fd00eeb,13271795281428482,9	1552456115	33.00000	13271795281428482	,0,	9fd00eeb	16777215	1,25	6000		0		0		k-v	0
29495211		chat.bilibili.com	我小名也叫feifei怎么差别这么大	222.12100,1,25,16777215,1551532132,0,1e59307d,12787362212872196,9	1551532132	222.12100	12787362212872196	,0,	1e59307d	16777215	1,25	6000		0		0		k-v	0
29495211		chat.bilibili.com	啦啦啦	0.00200,1,25,16777215,1551258430,0,c9d50762,12643863446945792,9	1551258430	0.00200	12643863446945792	,0,	c9d50762	16777215	1,25	6000		0		0		k-v	0
29495211		chat.bilibili.com	巨蟹妈妈，都已女儿为中心了，这么年轻就不出去社交了	146.35500,1,25,16777215,1551205633,0,9d60c43,12616182750248964,9	1551205633	146.35500	12616182750248964	,0,	9d60c43	16777215	1,25	6000		0		0		k-v	0
29495211		chat.bilibili.com	她以前身材很好的，后来胖的	39.65900,1,25,16777215,1551205555,0,9d60c43,12616141873086464,9	1551205555	39.65900	12616141873086464	,0,	9d60c43	16777215	1,25	6000		0		0		k-v	0
29495211		chat.bilibili.com	这个男主是个演员吗？好眼熟	285.02700,1,25,16777215,1550393682,0,e3cbd234,12190486348431362,9	1550393682	285.02700	12190486348431362	,0,	e3cbd234	16777215	1,25	6000		0		0		k-v	0
29495211		chat.bilibili.com	小狗好可爱啊	116.67200,1,25,16777215,1550285209,0,2167ea5d,12133615303393284,9	1550285209	116.67200	12133615303393284	,0,	2167ea5d	16777215	1,25	6000		0		0		k-v	0
29495211		chat.bilibili.com	不胖啊，挺好的	1470.36000,1,25,16777215,1549481403,0,b89e77eb,11712189369417730,9	1549481403	1470.36000	11712189369417730	,0,	b89e77eb	16777215	1,25	6000		0		0		k-v	0
29495211		chat.bilibili.com	向往的生活，哈哈哈	114.31500,1,25,16777215,1549468852,0,aafc22df,11705609022341122,9	1549468852	114.31500	11705609022341122	,0,	aafc22df	16777215	1,25	6000		0		0		k-v	0
29495211		chat.bilibili.com	是为了拍照	2061.85300,1,25,16777215,1549057569,0,402e47cc,11489978213203968,9	1549057569	2061.85300	11489978213203968	,0,	402e47cc	16777215	1,25	6000		0		0		k-v	0
29495211		chat.bilibili.com	我觉得这种一个人玩真的没意思。要带小朋友一起来玩	591.44200,1,25,16777215,1549056594,0,402e47cc,11489466956382212,9	1549056594	591.44200	11489466956382212	,0,	402e47cc	16777215	1,25	6000		0		0		k-v	0
29495211		chat.bilibili.com	两百年 恩，差不多。2000万。感觉不够	87.86100,1,25,16777215,1549056177,0,402e47cc,11489248769736706,9	1549056177	87.86100	11489248769736706	,0,	402e47cc	16777215	1,25	6000		0		0		k-v	0
29495211		chat.bilibili.com	长长见识嘛	2159.85300,1,25,16777215,1548934173,0,f70ed499,11425283382968322,9	1548934173	2159.85300	11425283382968322	,0,	f70ed499	16777215	1,25	6000		0		0		k-v	0
29495211		chat.bilibili.com	= =哪里胖，人家喜欢这种身材啊	1240.35300,1,25,16777215,1546441657,0,bb2be7f0,10118486959849472,9	1546441657	1240.35300	10118486959849472	,0,	bb2be7f0	16777215	1,25	6000		0		0		k-v	0
29495211		chat.bilibili.com	前面的，你有内涵?你来拍一个给大家看看啊	2648.07900,1,25,16777215,1545781817,0,93be9f5b,9772540754395136,8	1545781817	2648.07900	9772540754395136	,0,	93be9f5b	16777215	1,25	6000		0		0		k-v	0
29495211		chat.bilibili.com	感觉这个小男孩抢了主角的风头	2497.97500,1,25,16777215,1545781432,0,93be9f5b,9772339283099648,8	1545781432	2497.97500	9772339283099648	,0,	93be9f5b	16777215	1,25	6000		0		0		k-v	0
29495211		chat.bilibili.com	既然是拍fefe and friends，为什么不找她的真朋友来拍	2295.22100,1,25,16777215,1545781114,0,93be9f5b,9772172197232640,8	1545781114	2295.22100	9772172197232640	,0,	93be9f5b	16777215	1,25	6000		0		0		k-v	0
29495211		chat.bilibili.com	真公主都没她过得好	2269.38000,1,25,16777215,1545781008,0,93be9f5b,9772116872265730,8	1545781008	2269.38000	9772116872265730	,0,	93be9f5b	16777215	1,25	6000		0		0		k-v	0
29495211		chat.bilibili.com	为什么她会这么爱自己的孩子	2109.92300,1,25,16777215,1545780765,0,93be9f5b,9771989154136064,8	1545780765	2109.92300	9771989154136064	,0,	93be9f5b	16777215	1,25	6000		0		0		k-v	0
29495211		chat.bilibili.com	真正的名媛教养都很好，不香那些暴发户	832.62700,1,25,16777215,1545778827,0,93be9f5b,9770973121740800,8	1545778827	832.62700	9770973121740800	,0,	93be9f5b	16777215	1,25	6000		0		0		k-v	0
29495211		chat.bilibili.com	昨天刚看完诺一妈妈安娜的采访，他们家太朴素了。。	773.50700,1,25,16777215,1545778739,0,93be9f5b,9770927378137088,8	1545778739	773.50700	9770927378137088	,0,	93be9f5b	16777215	1,25	6000		0		0		k-v	0
29495211		chat.bilibili.com	小孩子是不会不会演的，她这么开心有活力说明父母平时就很恩爱	582.72500,1,25,16777215,1545778494,0,93be9f5b,9770798579974144,8	1545778494	582.72500	9770798579974144	,0,	93be9f5b	16777215	1,25	6000		0		0		k-v	0
29495211		chat.bilibili.com	说实话我不太擅长这个	2204.30500,1,25,16777215,1544523686,0,ecdd59be,9112917907603458,8	1544523686	2204.30500	9112917907603458	,0,	ecdd59be	16777215	1,25	6000		0		0		k-v	0
29495211		chat.bilibili.com	必须开心啊	116.93500,1,25,16777215,1543340071,0,10cb854a,8492362506960898,8	1543340071	116.93500	8492362506960898	,0,	10cb854a	16777215	1,25	6000		0		0		k-v	0
29495211		chat.bilibili.com	哈哈哈哈哈哈模拟人生潇洒的带我一个	58.43700,1,25,16777215,1543249264,0,92057940,8444753731911682,8	1543249264	58.43700	8444753731911682	,0,	92057940	16777215	1,25	6000		0		0		k-v	0
29495211		chat.bilibili.com	这个小孩子太美了	2038.33000,1,25,16777215,1540829542,0,e555a391,7176122366689282,8	1540829542	2038.33000	7176122366689282	,0,	e555a391	16777215	1,25	6000		0		0		k-v	0
29495211		chat.bilibili.com	热情？	1476.50100,1,25,16777215,1540829099,0,e555a391,7175890054676480,8	1540829099	1476.50100	7175890054676480	,0,	e555a391	16777215	1,25	6000		0		0		k-v	0
29495211		chat.bilibili.com	没有诶 很好	1416.52400,1,25,16777215,1540829019,0,e555a391,7175848345468928,8	1540829019	1416.52400	7175848345468928	,0,	e555a391	16777215	1,25	6000		0		0		k-v	0
29495211		chat.bilibili.com	你们还好 我连女主都听不明白	1261.07800,1,25,16777215,1540828852,0,e555a391,7175760843898880,8	1540828852	1261.07800	7175760843898880	,0,	e555a391	16777215	1,25	6000		0		0		k-v	0
29495211		chat.bilibili.com	我很难得用游泳池	562.48100,4,18,16777215,1539338516,0,62f04f7a,6394395531149316,8	1539338516	562.48100	6394395531149316	,0,	62f04f7a	16777215	4,18	6000		0		0		k-v	0
29495211		chat.bilibili.com	让菲菲开心和让其他三岁孩子开心一样	517.07100,4,18,16777215,1539338284,0,62f04f7a,6394273644675072,8	1539338284	517.07100	6394273644675072	,0,	62f04f7a	16777215	4,18	6000		0		0		k-v	0
29495211		chat.bilibili.com	其实就是让三岁的小女孩感到开心	508.57600,4,18,16777215,1539338181,0,62f04f7a,6394219656642564,8	1539338181	508.57600	6394219656642564	,0,	62f04f7a	16777215	4,18	6000		0		0		k-v	0
29495211		chat.bilibili.com	她不停地蹦蹦跳跳跑来跑去	488.99700,4,18,16777215,1539338117,0,62f04f7a,6394186210738180,8	1539338117	488.99700	6394186210738180	,0,	62f04f7a	16777215	4,18	6000		0		0		k-v	0
29495211		chat.bilibili.com	当她做开心的事时我是最快乐的	530.29900,4,18,16777215,1539338064,0,62f04f7a,6394158406696960,8	1539338064	530.29900	6394158406696960	,0,	62f04f7a	16777215	4,18	6000		0		0		k-v	0
29495211		chat.bilibili.com	在啊，比如美第奇家族2333	482.39700,1,25,16777215,1539337960,0,62f04f7a,6394104068964416,8	1539337960	482.39700	6394104068964416	,0,	62f04f7a	16777215	1,25	6000		0		0		k-v	0
29495211		chat.bilibili.com	因为维密平价鸭	910.89400,1,25,16777215,1539269179,0,14ab2a8a,6358042992443396,8	1539269179	910.89400	6358042992443396	,0,	14ab2a8a	16777215	1,25	6000		0		0		k-v	0
29495211		chat.bilibili.com	其实这个搞个游乐场 家里有地方完全可以搞 我有想到	592.85200,1,25,16777215,1538449774,0,aa4bfdad,5928438633857026,8	1538449774	592.85200	5928438633857026	,0,	aa4bfdad	16777215	1,25	6000		0		0		k-v	0
29495211		chat.bilibili.com	有钱还用刷牙?天真	131.13600,1,25,16777215,1538408240,0,15a2c9b1,5906662812549122,8	1538408240	131.13600	5906662812549122	,0,	15a2c9b1	16777215	1,25	6000		0		0		k-v	0
29495211		chat.bilibili.com	就不能想点别人好么	654.11400,1,25,16777215,1538034295,0,fce590cc,5710608071655426,8	1538034295	654.11400	5710608071655426	,0,	fce590cc	16777215	1,25	6000		0		0		k-v	0
29495211		chat.bilibili.com	在模拟人生里潇洒的 2333 我也是	54.98600,1,25,16777215,1537415958,0,1216339d,5386421336014850,8	1537415958	54.98600	5386421336014850	,0,	1216339d	16777215	1,25	6000		0		0		k-v	0
29495211		chat.bilibili.com	翻译错了，是sort of，不是软软的	729.91100,1,25,16777215,1536818499,0,c2ef9a47,5073180621799424,8	1536818499	729.91100	5073180621799424	,0,	c2ef9a47	16777215	1,25	6000		0		0		k-v	0
29495211		chat.bilibili.com	那个推车是选礼物捐给其他小朋友的	51.95500,1,25,16777215,1536235344,0,de033a30,4767439544385536,8	1536235344	51.95500	4767439544385536	,0,	de033a30	16777215	1,25	6000		0		0		k-v	0
29495211		chat.bilibili.com	说人家笑的有病吧，歪果仁本来就很喜欢笑表情都很夸张的	1614.17400,1,25,16777215,1535293778,0,a5c0dc0b,4273787682422784,8	1535293778	1614.17400	4273787682422784	,0,	a5c0dc0b	16777215	1,25	6000		0		0		k-v	0
29495211		chat.bilibili.com	投胎是个技术活	582.84600,1,25,16777215,1535012102,0,8a07dc69,4126108576382980,8	1535012102	582.84600	4126108576382980	,0,	8a07dc69	16777215	1,25	6000		0		0		k-v	0
29495211		chat.bilibili.com	现在离婚了	681.41600,1,25,16777215,1534700229,0,8bc2bd54,3962597449138180,8	1534700229	681.41600	3962597449138180	,0,	8bc2bd54	16777215	1,25	6000		0		0		k-v	0
29495211		chat.bilibili.com	英音？	204.14900,1,25,16777215,1534416661,0,db29c966,3813926038929412,8	1534416661	204.14900	3813926038929412	,0,	db29c966	16777215	1,25	6000		0		0		k-v	0
29495211		chat.bilibili.com	人家去画廊是买画 我去画廊是拍装逼照	1074.52900,1,25,16777215,1533533362,0,1446ed4f,3350823091830788,8	1533533362	1074.52900	3350823091830788	,0,	1446ed4f	16777215	1,25	6000		0		0		k-v	0
29495211		chat.bilibili.com	我要重新投胎！！！	583.07600,1,25,16777215,1533532300,0,1446ed4f,3350265943556096,8	1533532300	583.07600	3350265943556096	,0,	1446ed4f	16777215	1,25	6000		0		0		k-v	0
29495211		chat.bilibili.com	我要去当管家！！	440.32000,1,25,16777215,1533532144,0,1446ed4f,3350184540504064,8	1533532144	440.32000	3350184540504064	,0,	1446ed4f	16777215	1,25	6000		0		0		k-v	0
29495211		chat.bilibili.com	仇富还来看的真的有病吧，赚钱去看心理医生比较适合妮	190.73400,1,25,16777215,1532686794,0,55b38194,2906977478377472,8	1532686794	190.73400	2906977478377472	,0,	55b38194	16777215	1,25	6000		0		0		k-v	0
29495211		chat.bilibili.com	我在澳大利亚玩过这个，我都是一个一个压的，人家一摞一摞压(狗头)	2228.76000,1,25,16777215,1532163262,0,c6f3841e,2632495950987264,8	1532163262	2228.76000	2632495950987264	,0,	c6f3841e	16777215	1,25	6000		0		0		k-v	0
29495211		chat.bilibili.com	我觉得女主人身材很棒啊，非要瘦的跟筷子一样才好看吗	1220.26000,1,25,16777215,1532162199,0,c6f3841e,2631938781741056,8	1532162199	1220.26000	2631938781741056	,0,	c6f3841e	16777215	1,25	6000		0		0		k-v	0
29495211		chat.bilibili.com	管家领带歪了	99.01400,1,25,16777215,1531716072,0,6f33eef0,2398039599742978,8	1531716072	99.01400	2398039599742978	,0,	6f33eef0	16777215	1,25	6000		0		0		k-v	0
29495211		chat.bilibili.com	女儿的生日	696.41700,1,25,16777215,1531147256,0,20a8713d,2099816173666308,8	1531147256	696.41700	2099816173666308	,0,	20a8713d	16777215	1,25	6000		0		0		k-v	0
29495211		chat.bilibili.com	这个还上新闻来自着	693.13700,1,25,16777215,1531147247,0,20a8713d,2099811440918532,8	1531147247	693.13700	2099811440918532	,0,	20a8713d	16777215	1,25	6000		0		0		k-v	0
29495211		chat.bilibili.com	凯特王妃的邻居啊	79.68000,1,25,16777215,1531146483,0,20a8713d,2099410763251712,8	1531146483	79.68000	2099410763251712	,0,	20a8713d	16777215	1,25	6000		0		0		k-v	0
29495211		chat.bilibili.com	有	1596.23900,1,25,16777215,1531117343,0,a8ead81b,2084133100060672,8	1531117343	1596.23900	2084133100060672	,0,	a8ead81b	16777215	1,25	6000		0		0		k-v	0
29495211		chat.bilibili.com	生活态度好	761.72300,1,25,16777215,1531114925,0,a8ead81b,2082865325015040,8	1531114925	761.72300	2082865325015040	,0,	a8ead81b	16777215	1,25	6000		0		0		k-v	0
29495211		chat.bilibili.com	野生菌好可爱😂	415.00000,1,25,16777215,1531114271,0,a8ead81b,2082522511966208,8	1531114271	415.00000	2082522511966208	,0,	a8ead81b	16777215	1,25	6000		0		0		k-v	0
29495211		chat.bilibili.com	我觉得她性格也很好	136.58900,1,25,16777215,1531113981,0,a8ead81b,2082370296479746,8	1531113981	136.58900	2082370296479746	,0,	a8ead81b	16777215	1,25	6000		0		0		k-v	0
29495211		chat.bilibili.com	她的鼻子	233.14200,1,25,16777215,1530679211,0,891d2295,1854426033160192,8	1530679211	233.14200	1854426033160192	,0,	891d2295	16777215	1,25	6000		0		0		k-v	0
29495211		chat.bilibili.com	她的弟子	227.88000,1,25,16777215,1530679206,0,891d2295,1854423272259588,8	1530679206	227.88000	1854423272259588	,0,	891d2295	16777215	1,25	6000		0		0		k-v	0
29495211		chat.bilibili.com	有钱的生活我们想象不到	65.21800,1,25,16777215,1530177478,0,5e1a21ff,1591373082918916,8	1530177478	65.21800	1591373082918916	,0,	5e1a21ff	16777215	1,25	6000		0		0		k-v	0
29495211		chat.bilibili.com	在现场	118.08100,1,25,16777215,1529971703,0,e15744b3,1483487923666944,8	1529971703	118.08100	1483487923666944	,0,	e15744b3	16777215	1,25	6000		0		0		k-v	0
29495211		chat.bilibili.com	f1总裁女儿	58.21500,1,25,16777215,1529893400,0,89c3a51c,1442434284257280,8	1529893400	58.21500	1442434284257280	,0,	89c3a51c	16777215	1,25	6000		0		0		k-v	0
29495211		chat.bilibili.com	LA真的棒	2568.85000,1,25,16777215,1529237310,0,1a6384e0,1098454310322178,8	1529237310	2568.85000	1098454310322178	,0,	1a6384e0	16777215	1,25	6000		0		0		k-v	0
29495211		chat.bilibili.com	去看那个亿万富翁的有钱人生 更不真实	2455.70200,1,25,16777215,1529237184,0,1a6384e0,1098388426719236,8	1529237184	2455.70200	1098388426719236	,0,	1a6384e0	16777215	1,25	6000		0		0		k-v	0
29495211		chat.bilibili.com	没什么不真实的 只是你想象不到	2449.79800,1,25,16777215,1529237058,0,1a6384e0,1098322073878528,8	1529237058	2449.79800	1098322073878528	,0,	1a6384e0	16777215	1,25	6000		0		0		k-v	0
29495211		chat.bilibili.com	或许人家看来只是娱乐	2245.23700,1,25,16777215,1529236827,0,1a6384e0,1098201220775940,8	1529236827	2245.23700	1098201220775940	,0,	1a6384e0	16777215	1,25	6000		0		0		k-v	0
29495211		chat.bilibili.com	干嘛心酸啊…本来就是看节目而已 难道没有自己的生活吗…	2139.49700,1,25,16777215,1529236706,0,1a6384e0,1098137483608064,8	1529236706	2139.49700	1098137483608064	,0,	1a6384e0	16777215	1,25	6000		0		0		k-v	0
29495211		chat.bilibili.com	LA真的好棒啊	1905.52800,1,25,16777215,1529236441,0,1a6384e0,1097999024390144,8	1529236441	1905.52800	1097999024390144	,0,	1a6384e0	16777215	1,25	6000		0		0		k-v	0
29495211		chat.bilibili.com	不能说找朋友吧…是合作伙伴	1848.33500,1,25,16777215,1529236367,0,1a6384e0,1097959801880576,8	1529236367	1848.33500	1097959801880576	,0,	1a6384e0	16777215	1,25	6000		0		0		k-v	0
29495211		chat.bilibili.com	私人飞机不用系安全带的吗……	1705.50900,1,25,16777215,1529236198,0,1a6384e0,1097871534325760,8	1529236198	1705.50900	1097871534325760	,0,	1a6384e0	16777215	1,25	6000		0		0		k-v	0
29495211		chat.bilibili.com	玫红色真的笑的假……	1667.84600,1,25,16777215,1529236132,0,1a6384e0,1097836783992834,8	1529236132	1667.84600	1097836783992834	,0,	1a6384e0	16777215	1,25	6000		0		0		k-v	0
29495211		chat.bilibili.com	女儿太可爱了	1501.07300,1,25,16777215,1529235942,0,1a6384e0,1097737408872448,8	1529235942	1501.07300	1097737408872448	,0,	1a6384e0	16777215	1,25	6000		0		0		k-v	0
29495211		chat.bilibili.com	她老公是贝克汉姆口音	219.97800,1,25,16777215,1529202793,0,97a55d10,1080357614518274,8	1529202793	219.97800	1080357614518274	,0,	97a55d10	16777215	1,25	6000		0		0		k-v	0
29495211		chat.bilibili.com	这个梳子也挺贵的....	2035.78400,1,25,15138834,1529157074,0,5fc49422,1056387459186688,8	1529157074	2035.78400	1056387459186688	,0,	5fc49422	15138834	1,25	6000		0		0		k-v	0
29495211		chat.bilibili.com	这个梳子也挺贵的，而且她这	2030.65100,1,25,15138834,1529157055,0,5fc49422,1056377867862080,8	1529157055	2030.65100	1056377867862080	,0,	5fc49422	15138834	1,25	6000		0		0		k-v	0
29495211		chat.bilibili.com	这个梳子也挺贵的...	2037.63000,1,25,15138834,1529157008,0,5fc49422,1056353235238912,8	1529157008	2037.63000	1056353235238912	,0,	5fc49422	15138834	1,25	6000		0		0		k-v	0
29495211		chat.bilibili.com	瞧这肚子↓	2506.66800,5,25,16777215,1528879624,0,1035add4,910924020449280,8	1528879624	2506.66800	910924020449280	,0,	1035add4	16777215	5,25	6000		0		0		k-v	0
29495211		chat.bilibili.com	承包KK	2440.82300,1,25,16777215,1528879533,0,1035add4,910876334358528,8	1528879533	2440.82300	910876334358528	,0,	1035add4	16777215	1,25	6000		0		0		k-v	0
29495211		chat.bilibili.com	这都能看见狗子	2445.41800,1,25,16777215,1528879502,0,1035add4,910860160073728,8	1528879502	2445.41800	910860160073728	,0,	1035add4	16777215	1,25	6000		0		0		k-v	0
29495211		chat.bilibili.com	啊！！！！！！！我的狗子！！！！！！	2442.50500,1,25,16777215,1528879491,0,1035add4,910853998116864,8	1528879491	2442.50500	910853998116864	,0,	1035add4	16777215	1,25	6000		0		0		k-v	0
29495211		chat.bilibili.com	惯的	2380.70200,1,25,16777215,1528879412,0,1035add4,910812790652928,8	1528879412	2380.70200	910812790652928	,0,	1035add4	16777215	1,25	6000		0		0		k-v	0
29495211		chat.bilibili.com	为什么要选朋友？	1865.50200,1,25,16777215,1528879146,0,1035add4,910673272373248,8	1528879146	1865.50200	910673272373248	,0,	1035add4	16777215	1,25	6000		0		0		k-v	0
29495211		chat.bilibili.com	型男	1848.10000,1,25,16777215,1528879111,0,1035add4,910655054938112,8	1528879111	1848.10000	910655054938112	,0,	1035add4	16777215	1,25	6000		0		0		k-v	0
29495211		chat.bilibili.com	我去这个亚洲面孔人笑的好假	1663.87300,1,25,16777215,1528878942,0,1035add4,910566269911040,8	1528878942	1663.87300	910566269911040	,0,	1035add4	16777215	1,25	6000		0		0		k-v	0
29495211		chat.bilibili.com	………不要纠结名字了，反正就是有钱人住的地方	1393.41900,1,25,16777215,1528878774,0,1035add4,910478408679424,8	1528878774	1393.41900	910478408679424	,0,	1035add4	16777215	1,25	6000		0		0		k-v	0
29495211		chat.bilibili.com	我去，自动！！！	1264.35100,1,25,16777215,1528878617,0,1035add4,910396068724736,8	1528878617	1264.35100	910396068724736	,0,	1035add4	16777215	1,25	6000		0		0		k-v	0
29495211		chat.bilibili.com	人家这是富态美	1243.68700,1,25,16777215,1528878582,0,1035add4,910377420849152,8	1528878582	1243.68700	910377420849152	,0,	1035add4	16777215	1,25	6000		0		0		k-v	0
29495211		chat.bilibili.com	这么美好的生活，都忘记发弹幕了	1156.29700,1,25,16777215,1528878484,0,1035add4,910326187950080,8	1528878484	1156.29700	910326187950080	,0,	1035add4	16777215	1,25	6000		0		0		k-v	0
29495211		chat.bilibili.com	有	1151.35400,1,25,16777215,1528878462,0,1035add4,910314883776512,8	1528878462	1151.35400	910314883776512	,0,	1035add4	16777215	1,25	6000		0		0		k-v	0
29495211		chat.bilibili.com	这狗好壮实！	1028.45400,1,25,16777215,1528878334,0,1035add4,910247704657920,8	1528878334	1028.45400	910247704657920	,0,	1035add4	16777215	1,25	6000		0		0		k-v	0
29495211		chat.bilibili.com	这么多公主………以后长大了都不要怎么办	1007.20500,1,25,16777215,1528878302,0,1035add4,910230945792000,8	1528878302	1007.20500	910230945792000	,0,	1035add4	16777215	1,25	6000		0		0		k-v	0
29495211		chat.bilibili.com	狗不乐意了	965.74400,1,25,16777215,1528878244,0,1035add4,910200645615616,8	1528878244	965.74400	910200645615616	,0,	1035add4	16777215	1,25	6000		0		0		k-v	0
29495211		chat.bilibili.com	Fuck	947.44700,1,25,16777215,1528878219,0,1035add4,910187288854528,8	1528878219	947.44700	910187288854528	,0,	1035add4	16777215	1,25	6000		0		0		k-v	0
29495211		chat.bilibili.com	这个布里裹着的是什么！好像手指！	745.82600,1,25,16777215,1528878013,0,1035add4,910079519883264,8	1528878013	745.82600	910079519883264	,0,	1035add4	16777215	1,25	6000		0		0		k-v	0
29495211		chat.bilibili.com	让我放棵树也行	709.41700,1,25,16777215,1528877936,0,1035add4,910039130832896,8	1528877936	709.41700	910039130832896	,0,	1035add4	16777215	1,25	6000		0		0		k-v	0
29495211		chat.bilibili.com	卧槽，我想去死	589.02300,1,25,16777215,1528877791,0,1035add4,909962787684352,8	1528877791	589.02300	909962787684352	,0,	1035add4	16777215	1,25	6000		0		0		k-v	0
29495211		chat.bilibili.com	妈呀，她长大了怎么办	576.98200,1,25,16777215,1528877772,0,1035add4,909952783745024,8	1528877772	576.98200	909952783745024	,0,	1035add4	16777215	1,25	6000		0		0		k-v	0
29495211		chat.bilibili.com	我要重新投胎	541.56200,1,25,16777215,1528877724,0,1035add4,909927758954496,8	1528877724	541.56200	909927758954496	,0,	1035add4	16777215	1,25	6000		0		0		k-v	0
29495211		chat.bilibili.com	后面是冰雪奇缘里的女王建的房子！！！	459.95300,1,25,16777215,1528877615,0,1035add4,909870586396672,8	1528877615	459.95300	909870586396672	,0,	1035add4	16777215	1,25	6000		0		0		k-v	0
29495211		chat.bilibili.com	我需要重置！！！	176.70500,1,25,16777215,1528877309,0,1035add4,909710404878336,8	1528877309	176.70500	909710404878336	,0,	1035add4	16777215	1,25	6000		0		0		k-v	0
29495211		chat.bilibili.com	三人床！够爽！从没见过	111.05900,1,25,16777215,1528877224,0,1035add4,909665581924356,8	1528877224	111.05900	909665581924356	,0,	1035add4	16777215	1,25	6000		0		0		k-v	0
29495211		chat.bilibili.com	狗会投胎	233.09900,1,25,16777215,1528279292,0,5bfaddbe,596177126948864,8	1528279292	233.09900	596177126948864	,0,	5bfaddbe	16777215	1,25	6000		0		0		k-v	0
29495211		chat.bilibili.com	哈哈哈于晓光那个别走	185.13400,1,25,16777215,1527689830,0,f4e36aab,287128999165954,8	1527689830	185.13400	287128999165954	,0,	f4e36aab	16777215	1,25	6000		0		0		k-v	0
29495211		chat.bilibili.com	……内涵从日常娱乐看出来?不是很懂前面的	2657.51400,1,25,16777215,1527274768,0,86fb0f71,69516970164226,8	1527274768	2657.51400	69516970164226	,0,	86fb0f71	16777215	1,25	6000		0		0		k-v	0
29495211		chat.bilibili.com	今晚小赌一局如何？	1550.82500,4,18,6697932,1527008992,0,568b495f,4557062424,8	1527008992	1550.82500	4557062424	,0,	568b495f	6697932	4,18	6000		0		0		k-v	0
29495211		chat.bilibili.com	当我拿到票后sam总是我第一个想到的人	1539.32600,4,18,6697932,1527008890,0,568b495f,4557060081,8	1527008890	1539.32600	4557060081	,0,	568b495f	6697932	4,18	6000		0		0		k-v	0
29495211		chat.bilibili.com	我要和我最好的朋友sam一起去拉斯维加斯	1523.71900,4,18,6697932,1527008822,0,568b495f,4557058001,8	1527008822	1523.71900	4557058001	,0,	568b495f	6697932	4,18	6000		0		0		k-v	0
29495211		chat.bilibili.com	有的时候要给jay一些男人的时间，暂时离开另一半的空间	1505.44700,4,18,6697932,1527008794,0,568b495f,4557057295,8	1527008794	1505.44700	4557057295	,0,	568b495f	6697932	4,18	6000		0		0		k-v	0
29495211		chat.bilibili.com	拳击	1477.32300,4,18,6697932,1527008729,0,568b495f,4557055786,8	1527008729	1477.32300	4557055786	,0,	568b495f	6697932	4,18	6000		0		0		k-v	0		翻译修改（自我）
29495211		chat.bilibili.com	抱歉宝贝 我要看全集	1477.32300,4,18,6697932,1527008722,0,568b495f,4557055626,8	1527008722	1477.32300	4557055626	,0,	568b495f	6697932	4,18	6000		0		0		k-v	0
29495211		chat.bilibili.com	是的	1472.45400,4,18,6697932,1527008709,0,568b495f,4557055326,8	1527008709	1472.45400	4557055326	,0,	568b495f	6697932	4,18	6000		0		0		k-v	0
29495211		chat.bilibili.com	去拉斯维加斯激动吗	1470.87600,4,18,6697932,1527008698,0,568b495f,4557055072,8	1527008698	1470.87600	4557055072	,0,	568b495f	6697932	4,18	6000		0		0		k-v	0
29495211		chat.bilibili.com	这不仅仅是关于饱腹和营养，这也有关安慰，我觉得这是母女间最重要的事情	1330.08100,4,18,6697932,1527008509,0,568b495f,4557050547,8	1527008509	1330.08100	4557050547	,0,	568b495f	6697932	4,18	6000		0		0		k-v	0		一行字数太多	加了逗号不符合中文字幕规范
29495211		chat.bilibili.com	tamara喜欢给孩子读书，她做什么我都很支持，我认为她在做正确的事，这是世界上最自然的事情	1324.39800,4,18,6697932,1527008436,0,568b495f,4557048748,8	1527008436	1324.39800	4557048748	,0,	568b495f	6697932	4,18	6000		0		0		k-v	0		一行字数太多	加了逗号不符合中文字幕规范	直译，翻译质量不高
29495211		chat.bilibili.com	你可以自己读福尔摩斯，你太厉害了	1300.10300,4,18,6697932,1527008262,0,568b495f,4557044259,8	1527008262	1300.10300	4557044259	,0,	568b495f	6697932	4,18	6000		0		0		k-v	0			加了逗号不符合中文字幕规范
29495211		chat.bilibili.com	我和fifi有很多互动的时刻，我读故事，真的让人很放松	1274.39100,4,18,6697932,1527008173,0,568b495f,4557042080,8	1527008173	1274.39100	4557042080	,0,	568b495f	6697932	4,18	6000		0		0		k-v	0		一行字数太多	加了逗号不符合中文字幕规范
29495211		chat.bilibili.com	这是我最喜欢的时刻	1272.89000,4,18,6697932,1527008145,0,568b495f,4557041332,8	1527008145	1272.89000	4557041332	,0,	568b495f	6697932	4,18	6000		0		0		k-v	0
29495211		chat.bilibili.com	嘴张大点	1267.28000,4,18,6697932,1527008133,0,568b495f,4557040976,8	1527008133	1267.28000	4557040976	,0,	568b495f	6697932	4,18	6000		0		0		k-v	0
29495211		chat.bilibili.com	这个真的是很时髦的睡衣了	1248.36900,4,18,6684723,1527008078,0,568b495f,4557039515,8	1527008078	1248.36900	4557039515	,0,	568b495f	6684723	4,18	6000		0		0		k-v	0
29495211		chat.bilibili.com	olivia给我的 她应该被逮捕	1177.74700,4,18,6684723,1527007988,0,568b495f,4557037104,8	1527007988	1177.74700	4557037104	,0,	568b495f	6684723	4,18	6000		0		0		k-v	0
29495211		chat.bilibili.com	这睡衣哪来的	1167.71700,4,18,6684723,1527007951,0,568b495f,4557036125,8	1527007951	1167.71700	4557036125	,0,	568b495f	6684723	4,18	6000		0		0		k-v	0
29495211		chat.bilibili.com	你嫉妒我呢	1165.49000,4,18,6684723,1527007938,0,568b495f,4557035705,8	1527007938	1165.49000	4557035705	,0,	568b495f	6684723	4,18	6000		0		0		k-v	0
29495211		chat.bilibili.com	天啊，你还穿着睡衣	1162.97500,4,18,6684723,1527007924,0,568b495f,4557035333,8	1527007924	1162.97500	4557035333	,0,	568b495f	6684723	4,18	6000		0		0		k-v	0			加了逗号不符合中文字幕规范
29495211		chat.bilibili.com	今天过得如何 ？ 还不错	1159.07700,4,18,6684723,1527007860,0,568b495f,4557033683,8	1527007860	1159.07700	4557033683	,0,	568b495f	6684723	4,18	6000		0		0		k-v	0
29495211		chat.bilibili.com	我的工作是发掘商业机会，好的艺术家，更好的展示他们的作品，这是我的热爱所在	1071.57400,4,18,6684723,1527007756,0,568b495f,4557030673,8	1527007756	1071.57400	4557030673	,0,	568b495f	6684723	4,18	6000		0		0		k-v	0		一行字数太多	加了逗号不符合中文字幕规范
29495211		chat.bilibili.com	艺术资产开发正合我对于当代艺术的热情	1062.35800,4,18,6684723,1527007645,0,568b495f,4557027516,8	1527007645	1062.35800	4557027516	,0,	568b495f	6684723	4,18	6000		0		0		k-v	0
29495211		chat.bilibili.com	这一副太棒了，黑金是我最喜欢的组合	1055.07300,4,18,6684723,1527007579,0,568b495f,4557025589,8	1527007579	1055.07300	4557025589	,0,	568b495f	6684723	4,18	6000		0		0		k-v	0			加了逗号不符合中文字幕规范
29495211		chat.bilibili.com	菲：你应该用到你的肌肉 ta：我努力用肌肉的力量了	1021.32300,4,18,6684672,1527007522,0,568b495f,4557023960,8	1527007522	1021.32300	4557023960	,0,	568b495f	6684672	4,18	6000		0		0		k-v	0		两人说话
29495211		chat.bilibili.com	你可以从旅行中学习获得经验	1009.44900,4,18,6684672,1527007488,0,568b495f,4557022963,8	1527007488	1009.44900	4557022963	,0,	568b495f	6684672	4,18	6000		0		0		k-v	0
29495211		chat.bilibili.com	菲：我要把他打包起来 ta：不，我们要让他呆在这	953.26300,4,18,6684672,1527007418,0,568b495f,4557020949,8	1527007418	953.26300	4557020949	,0,	568b495f	6684672	4,18	6000		0		0		k-v	0		两人说话
29495211		chat.bilibili.com	我是一个喜欢恶作剧的人	894.32000,4,18,6684672,1527007317,0,568b495f,4557017990,8	1527007317	894.32000	4557017990	,0,	568b495f	6684672	4,18	6000		0		0		k-v	0
29495211		chat.bilibili.com	好吧 我承认我是有点强势	856.65800,4,18,6684672,1527007243,0,568b495f,4557015885,8	1527007243	856.65800	4557015885	,0,	568b495f	6684672	4,18	6000		0		0		k-v	0
29495211		chat.bilibili.com	我不强势啊	850.21900,4,18,6684672,1527007228,0,568b495f,4557015429,8	1527007228	850.21900	4557015429	,0,	568b495f	6684672	4,18	6000		0		0		k-v	0
29495211		chat.bilibili.com	我其实挺着迷于tamara的强势	847.96800,4,18,6684672,1527007219,0,568b495f,4557015159,8	1527007219	847.96800	4557015159	,0,	568b495f	6684672	4,18	6000		0		0		k-v	0
29495211		chat.bilibili.com	醒来带妆的请参考麦瑟尔夫人	111.45500,1,25,16777215,1526470357,0,1886b334,4541061760,8	1526470357	111.45500	4541061760	,0,	1886b334	16777215	1,25	6000		0		0		k-v	0
29495211		chat.bilibili.com	What do I know！！！！！！	68.45200,1,25,16777215,1526470028,0,1886b334,4541049136,8	1526470028	68.45200	4541049136	,0,	1886b334	16777215	1,25	6000		0		0		k-v	0
29495211		chat.bilibili.com	天哪好可爱	1025.92300,1,25,16777215,1525703176,0,8ffc508a,4519765403,8	1525703176	1025.92300	4519765403	,0,	8ffc508a	16777215	1,25	6000		0		0		k-v	0
29495211		chat.bilibili.com	Boss	983.79500,1,25,16777215,1525703134,0,8ffc508a,4519763136,8	1525703134	983.79500	4519763136	,0,	8ffc508a	16777215	1,25	6000		0		0		k-v	0
29495211		chat.bilibili.com	衣服可爱！	965.97700,1,25,16777215,1525703116,0,8ffc508a,4519762103,8	1525703116	965.97700	4519762103	,0,	8ffc508a	16777215	1,25	6000		0		0		k-v	0
29495211		chat.bilibili.com	人家只是有钱而已为啥不能会做饭	835.05200,1,25,16777215,1525702985,0,8ffc508a,4519755017,8	1525702985	835.05200	4519755017	,0,	8ffc508a	16777215	1,25	6000		0		0		k-v	0
29495211		chat.bilibili.com	天哪噜好甜啊一家	738.38700,1,25,16777215,1525702888,0,8ffc508a,4519749714,8	1525702888	738.38700	4519749714	,0,	8ffc508a	16777215	1,25	6000		0		0		k-v	0
29495211		chat.bilibili.com	前面的你交朋友随心所欲，千万富翁你是不是随便交啊	1816.43000,1,25,16777215,1525627944,0,a7b79f53,4517971381,8	1525627944	1816.43000	4517971381	,0,	a7b79f53	16777215	1,25	6000		0		0		k-v	0
29495211		chat.bilibili.com	真的有点像阿呆	1246.28500,1,25,16777215,1525627361,0,a7b79f53,4517957326,8	1525627361	1246.28500	4517957326	,0,	a7b79f53	16777215	1,25	6000		0		0		k-v	0
29495211		chat.bilibili.com	没人了	1306.22800,1,25,16777215,1525251448,0,39d75893,4505348421,8	1525251448	1306.22800	4505348421	,0,	39d75893	16777215	1,25	6000		0		0		k-v	0
29495211		chat.bilibili.com	24K	1527.97400,1,25,16777215,1525235841,0,e29a7ab0,4504936184,8	1525235841	1527.97400	4504936184	,0,	e29a7ab0	16777215	1,25	6000		0		0		k-v	0
29495211		chat.bilibili.com	给女儿挑拍硬照的小伙伴 标准就是看女儿想不想跟他们玩	1792.67400,1,25,16777215,1525232000,0,c1a2cff,4504821977,8	1525232000	1792.67400	4504821977	,0,	c1a2cff	16777215	1,25	6000		0		0		k-v	0
29495211		chat.bilibili.com	幸好没有字母！	16.67000,1,25,16777215,1524815512,0,a931a714,4490371603,8	1524815512	16.67000	4490371603	,0,	a931a714	16777215	1,25	6000		0		0		k-v	0
29495211		chat.bilibili.com	他朋友很帅啊	2438.69900,1,25,16777215,1524730651,0,886ea12f,4488215858,8	1524730651	2438.69900	4488215858	,0,	886ea12f	16777215	1,25	6000		0		0		k-v	0
29495211		chat.bilibili.com	想要	595.77600,1,25,16777215,1524229820,0,10d689ef,4474112652,8	1524229820	595.77600	4474112652	,0,	10d689ef	16777215	1,25	6000		0		0		k-v	0
29495211		chat.bilibili.com	第一条是我！！！	0.20300,1,25,16777215,1524074274,0,3afb2c6,4470499623,8	1524074274	0.20300	4470499623	,0,	3afb2c6	16777215	1,25	6000		0		0		k-v	0
29495211		chat.bilibili.com	投胎也得有一手好英语	73.16400,1,25,16777215,1523949818,0,b80e8e80,4467108477,8	1523949818	73.16400	4467108477	,0,	b80e8e80	16777215	1,25	6000		0		0		k-v	0
29495211		chat.bilibili.com	没有安迪的游乐场大。	498.44600,1,25,16777215,1523920004,0,b0b03510,4466514311,8	1523920004	498.44600	4466514311	,0,	b0b03510	16777215	1,25	6000		0		0		k-v	0
29495211		chat.bilibili.com	小猪佩琦哈哈哈哈	738.78800,1,25,16777215,1523756974,0,f49a4a46,4461894268,8	1523756974	738.78800	4461894268	,0,	f49a4a46	16777215	1,25	6000		0		0		k-v	0
29495211		chat.bilibili.com	这个裙子真好看，但我怕是买不起	1908.69900,1,25,16777215,1523258182,0,e508beab,4448620142,8	1523258182	1908.69900	4448620142	,0,	e508beab	16777215	1,25	6000		0		0		k-v	0
29495211		chat.bilibili.com	字幕君不要抛弃我们啊	944.19500,1,25,16777215,1523166988,0,8f9a386e,4446461402,8	1523166988	944.19500	4446461402	,0,	8f9a386e	16777215	1,25	6000		0		0		k-v	0
29495211		chat.bilibili.com	感谢野生字幕君	457.01800,1,25,16777215,1523166491,0,8f9a386e,4446447916,8	1523166491	457.01800	4446447916	,0,	8f9a386e	16777215	1,25	6000		0		0		k-v	0
29495211		chat.bilibili.com	没人说话吗？	2188.32000,1,25,16777215,1522939775,0,355605d3,4438950005,8	1522939775	2188.32000	4438950005	,0,	355605d3	16777215	1,25	6000		0		0		k-v	0
29495211		chat.bilibili.com	脖子上带的什么这孩子	507.21600,1,25,16777215,1522893718,0,845789ac,4436653651,8	1522893718	507.21600	4436653651	,0,	845789ac	16777215	1,25	6000		0		0		k-v	0
29495211		chat.bilibili.com	请收下我的膝盖	66.43700,1,25,16777215,1522833649,0,233aace8,4434779429,8	1522833649	66.43700	4434779429	,0,	233aace8	16777215	1,25	6000		0		0		k-v	0
29495211		chat.bilibili.com	翻译君	27.15900,1,25,16777215,1522752927,0,29bc9aa8,4432868286,8	1522752927	27.15900	4432868286	,0,	29bc9aa8	16777215	1,25	6000		0		0		k-v	0
29495211		chat.bilibili.com	没字幕，没人嘛？	92.18200,1,25,16777215,1522651121,0,eb0613cc,4430559293,7	1522651121	92.18200	4430559293	,0,	eb0613cc	16777215	1,25	6000		0		0		k-v	0
29495211		chat.bilibili.com	可能是英国人还是比较含蓄 不太好意思表达 Miss U~~~	2588.12000,1,25,16777215,1522553131,0,66a6344a,4427603620,7	1522553131	2588.12000	4427603620	,0,	66a6344a	16777215	1,25	6000		0		0		k-v	0
29495211		chat.bilibili.com	感觉水要撒出来了	90.85600,1,25,16777215,1522230403,0,fba39e0e,4418641278,7	1522230403	90.85600	4418641278	,0,	fba39e0e	16777215	1,25	6000		0		0		k-v	0
29495211		chat.bilibili.com	拍照伙伴	1887.32100,1,25,16777215,1522174468,0,89f28647,4417830138,7	1522174468	1887.32100	4417830138	,0,	89f28647	16777215	1,25	6000		0		0		k-v	0
29495211		chat.bilibili.com	平穷限制了我得想象	602.42700,1,18,16777215,1521900692,0,5b4a2a74,4410040719,7	1521900692	602.42700	4410040719	,0,	5b4a2a74	16777215	1,18	6000		0		0		k-v	0
29495211		chat.bilibili.com	哇哇哇哇哇哇	581.50700,1,18,16777215,1521900655,0,5b4a2a74,4410038691,7	1521900655	581.50700	4410038691	,0,	5b4a2a74	16777215	1,18	6000		0		0		k-v	0
29495211		chat.bilibili.com	好幸福	503.14700,1,25,16777215,1521900564,0,5b4a2a74,4410033600,7	1521900564	503.14700	4410033600	,0,	5b4a2a74	16777215	1,25	6000		0		0		k-v	0
29495211		chat.bilibili.com	我就看看过过眼瘾	81.68400,1,25,16777215,1521900197,0,5b4a2a74,4410013482,7	1521900197	81.68400	4410013482	,0,	5b4a2a74	16777215	1,25	6000		0		0		k-v	0
29495211		chat.bilibili.com	请的模特，专门拍照，这个又不是”朋友“。人家项目的名字叫fefe&friends，主角自然只有一个人	2282.02200,1,25,16777215,1521563188,0,17e11f10,4401516483,7	1521563188	2282.02200	4401516483	,0,	17e11f10	16777215	1,25	6000		0		0		k-v	0
29495211		chat.bilibili.com	说道“complement还是忍不住w“唉太酸了	1810.31600,1,25,16777215,1521560369,0,17e11f10,4401409543,7	1521560369	1810.31600	4401409543	,0,	17e11f10	16777215	1,25	6000		0		0		k-v	0
29495211		chat.bilibili.com	感觉这女的卸妆后 长相很一般	232.42700,1,25,16777215,1521462770,0,e976f67b,4399013502,7	1521462770	232.42700	4399013502	,0,	e976f67b	16777215	1,25	6000		0		0		k-v	0
29495211		chat.bilibili.com	人生赢家 羡慕嫉妒恨	27.22500,1,25,16777215,1521462564,0,e976f67b,4399005825,7	1521462564	27.22500	4399005825	,0,	e976f67b	16777215	1,25	6000		0		0		k-v	0
29495211		chat.bilibili.com	都说了是生肉了还问为什么没有字幕。。。。	68.10200,1,25,16777215,1520866177,0,1199577a,4383809696,7	1520866177	68.10200	4383809696	,0,	1199577a	16777215	1,25	6000		0		0		k-v	0
29495211		chat.bilibili.com	同款牙刷2333	1279.28800,1,25,16777215,1520847983,0,29a9141,4383074012,7	1520847983	1279.28800	4383074012	,0,	29a9141	16777215	1,25	6000		0		0		k-v	0
29495211		chat.bilibili.com	很好看啊，微胖，肉肉的	1225.81100,1,25,16777215,1520600902,0,b9b98a19,4375695625,7	1520600902	1225.81100	4375695625	,0,	b9b98a19	16777215	1,25	6000		0		0		k-v	0
29495211		chat.bilibili.com	他有画廊生意的	1132.18900,1,25,16777215,1520600787,0,b9b98a19,4375690430,7	1520600787	1132.18900	4375690430	,0,	b9b98a19	16777215	1,25	6000		0		0		k-v	0
29495211		chat.bilibili.com	同喜欢口红，好漂亮的唇色	871.07600,1,25,16777215,1520600512,0,b9b98a19,4375678100,7	1520600512	871.07600	4375678100	,0,	b9b98a19	16777215	1,25	6000		0		0		k-v	0
29495211		chat.bilibili.com	好有爱啊	847.85600,1,25,16777215,1520600472,0,b9b98a19,4375676333,7	1520600472	847.85600	4375676333	,0,	b9b98a19	16777215	1,25	6000		0		0		k-v	0
29495211		chat.bilibili.com	这是一家有钱又有爱还接地气生活的贵族富豪啊啊啊啊啊啊	675.47100,1,25,16777215,1520600294,0,b9b98a19,4375668256,7	1520600294	675.47100	4375668256	,0,	b9b98a19	16777215	1,25	6000		0		0		k-v	0
29495211		chat.bilibili.com	不是生日，拍广告	2365.07600,1,25,16777215,1520522776,0,1769c9ac,4374056055,7	1520522776	2365.07600	4374056055	,0,	1769c9ac	16777215	1,25	6000		0		0		k-v	0
29495211		chat.bilibili.com	挑小孩拍广告	1734.06700,1,25,16777215,1520522544,0,1769c9ac,4374046717,7	1520522544	1734.06700	4374046717	,0,	1769c9ac	16777215	1,25	6000		0		0		k-v	0
29495211		chat.bilibili.com	女儿真的好漂亮，像洋娃娃一样的五官，有点像爸爸诶	526.14000,1,25,16777215,1520386481,0,4a2ba1fa,4370883798,7	1520386481	526.14000	4370883798	,0,	4a2ba1fa	16777215	1,25	6000		0		0		k-v	0
29495211		chat.bilibili.com	没弹幕？	892.65100,1,25,16777215,1520341016,0,d5420ac3,4369970995,7	1520341016	892.65100	4369970995	,0,	d5420ac3	16777215	1,25	6000		0		0		k-v	0
29495211		chat.bilibili.com	这是在拍产品广告啦	2498.69800,1,25,16777215,1520292057,0,6ae9d74b,4368719006,7	1520292057	2498.69800	4368719006	,0,	6ae9d74b	16777215	1,25	6000		0		0		k-v	0
29495211		chat.bilibili.com	是为她的产品拍广告片啦	2440.43600,1,25,16777215,1520291984,0,6ae9d74b,4368718500,7	1520291984	2440.43600	4368718500	,0,	6ae9d74b	16777215	1,25	6000		0		0		k-v	0
29495211		chat.bilibili.com	这是在拍广告啦	2344.23900,1,25,16777215,1520291889,0,6ae9d74b,4368717815,7	1520291889	2344.23900	4368717815	,0,	6ae9d74b	16777215	1,25	6000		0		0		k-v	0
29495211		chat.bilibili.com	她有个产品要拍广告，找合适的小孩，不要再说给她女儿选朋友啦！	1804.66900,1,25,16777215,1520291341,0,6ae9d74b,4368713994,7	1520291341	1804.66900	4368713994	,0,	6ae9d74b	16777215	1,25	6000		0		0		k-v	0
29495211		chat.bilibili.com	前面同款凡士林的别跑	1333.23300,1,25,16777215,1520252328,0,20fd2391,4367751886,7	1520252328	1333.23300	4367751886	,0,	20fd2391	16777215	1,25	6000		0		0		k-v	0
29495211		chat.bilibili.com	23333333	153.46200,1,25,16777215,1520097990,0,442bc1f6,4363347027,7	1520097990	153.46200	4363347027	,0,	442bc1f6	16777215	1,25	6000		0		0		k-v	0
29495211		chat.bilibili.com	就给我们看这个？	180.09500,1,25,16777215,1520021858,0,8e8de79a,4360206898,7	1520021858	180.09500	4360206898	,0,	8e8de79a	16777215	1,25	6000		0		0		k-v	0
29495211		chat.bilibili.com	？？？	166.72200,1,25,16777215,1520021845,0,8e8de79a,4360206773,7	1520021845	166.72200	4360206773	,0,	8e8de79a	16777215	1,25	6000		0		0		k-v	0
29495211		chat.bilibili.com	狗都比我幸福	112.55000,1,25,16777215,1520021790,0,8e8de79a,4360206320,7	1520021790	112.55000	4360206320	,0,	8e8de79a	16777215	1,25	6000		0		0		k-v	0
29495211		chat.bilibili.com	哇哇	87.11400,1,25,16777215,1520021765,0,8e8de79a,4360206115,7	1520021765	87.11400	4360206115	,0,	8e8de79a	16777215	1,25	6000		0		0		k-v	0
29495211		chat.bilibili.com	做自己最好	2692.58300,1,25,16777215,1520001146,0,b3a0e4bd,4359454134,7	1520001146	2692.58300	4359454134	,0,	b3a0e4bd	16777215	1,25	6000		0		0		k-v	0
29495211		chat.bilibili.com	How excited are you to reveal to her new surprise?	192.81500,1,25,16777215,1519992041,0,1f5a2b4,4358893224,7	1519992041	192.81500	4358893224	,0,	1f5a2b4	16777215	1,25	6000		0		0		k-v	0
29495211		chat.bilibili.com	投胎是个技术活	61.32200,1,25,16777215,1519832678,0,39c2886f,4353365346,7	1519832678	61.32200	4353365346	,0,	39c2886f	16777215	1,25	6000		0		0		k-v	0
29495211		chat.bilibili.com	所以男主人刚刚到底说了啥	1477.90000,1,25,16777215,1519824587,0,f1313879,4352879188,7	1519824587	1477.90000	4352879188	,0,	f1313879	16777215	1,25	6000		0		0		k-v	0
29495211		chat.bilibili.com	为什么没有字幕....	62.72500,1,25,16777215,1519824020,0,73ed76f5,4352847223,7	1519824020	62.72500	4352847223	,0,	73ed76f5	16777215	1,25	6000		0		0		k-v	0
29495211		chat.bilibili.com	这是什么车？	10.59800,1,25,16777215,1519822983,0,f1313879,4352791028,7	1519822983	10.59800	4352791028	,0,	f1313879	16777215	1,25	6000		0		0		k-v	0
29495211		chat.bilibili.com	亲子装~	1612.60300,1,25,16777215,1519804603,0,b63c8ca3,4351951432,7	1519804603	1612.60300	4351951432	,0,	b63c8ca3	16777215	1,25	6000		0		0		k-v	0
29495211		chat.bilibili.com	维秘在国外不算顶级品牌	909.89700,1,25,16777215,1519803524,0,a9dc55c3,4351909827,7	1519803524	909.89700	4351909827	,0,	a9dc55c3	16777215	1,25	6000		0		0		k-v	0
29495211		chat.bilibili.com	好可爱	813.62800,1,25,16777215,1519799256,0,9e18ba85,4351745120,7	1519799256	813.62800	4351745120	,0,	9e18ba85	16777215	1,25	6000		0		0		k-v	0
29495211		chat.bilibili.com	symphony	266.04000,1,25,16777215,1519796323,0,e28901e5,4351620910,7	1519796323	266.04000	4351620910	,0,	e28901e5	16777215	1,25	6000		0		0		k-v	0
29495211		chat.bilibili.com	在床上，带妆？	231.38200,1,25,16777215,1519795789,0,b9dd12e2,4351597064,7	1519795789	231.38200	4351597064	,0,	b9dd12e2	16777215	1,25	6000		0		0		k-v	0
29495211		chat.bilibili.com	我胖虎想捶死所谓的字幕君	214.16100,1,25,15138834,1519794581,0,18e7b86e,4351539648,7	1519794581	214.16100	4351539648	,0,	18e7b86e	15138834	1,25	6000		0		0		k-v	0
29495211		chat.bilibili.com	这是选出来拍照啊	2336.79800,1,25,16777215,1519789867,0,c1709ed,4351312698,7	1519789867	2336.79800	4351312698	,0,	c1709ed	16777215	1,25	6000		0		0		k-v	0
29495211		chat.bilibili.com	性格挺好的	2306.74400,1,25,16777215,1519789472,0,b13ad6f7,4351298130,7	1519789472	2306.74400	4351298130	,0,	b13ad6f7	16777215	1,25	6000		0		0		k-v	0
29495211		chat.bilibili.com	确信在泳池里面进行活动，人们也可以休息，吃，喝，做他们想做的任何事	2106.12100,1,25,16777215,1519789138,0,b13ad6f7,4351286247,7	1519789138	2106.12100	4351286247	,0,	b13ad6f7	16777215	1,25	6000		0		0		k-v	0
29495211		chat.bilibili.com	多拍照，不能说全部都是菲菲的镜头，但得保证她的镜头占多数	2089.36400,1,25,16777215,1519788948,0,b13ad6f7,4351279358,7	1519788948	2089.36400	4351279358	,0,	b13ad6f7	16777215	1,25	6000		0		0		k-v	0
29495211		chat.bilibili.com	你觉得怎么样？	2093.67800,1,25,16777215,1519788836,0,b13ad6f7,4351275437,7	1519788836	2093.67800	4351275437	,0,	b13ad6f7	16777215	1,25	6000		0		0		k-v	0
29495211		chat.bilibili.com	想喝这个果汁	836.60500,1,25,16777215,1519782430,0,1ff72e5b,4351070929,7	1519782430	836.60500	4351070929	,0,	1ff72e5b	16777215	1,25	6000		0		0		k-v	0
29495211		chat.bilibili.com	感觉爸爸像个老实人	657.59700,1,25,16777215,1519782251,0,1ff72e5b,4351066249,7	1519782251	657.59700	4351066249	,0,	1ff72e5b	16777215	1,25	6000		0		0		k-v	0
29495211		chat.bilibili.com	对对对，假面夫妻 女的整容 眼神尴尬 满意了？看个片子你们戏是真的多	1425.77600,5,25,15138834,1519774462,0,cbe8112,4350927156,7	1519774462	1425.77600	4350927156	,0,	cbe8112	15138834	5,25	6000		0		0		k-v	0
29495211		chat.bilibili.com	你们有的人真的别太酸了。人家眼神尴尬你都看得出？	629.56100,5,25,15138834,1519773547,0,cbe8112,4350919839,7	1519773547	629.56100	4350919839	,0,	cbe8112	15138834	5,25	6000		0		0		k-v	0
29495211		chat.bilibili.com	有	1151.70600,1,25,16777215,1519766430,0,b63c8ca3,4350878376,7	1519766430	1151.70600	4350878376	,0,	b63c8ca3	16777215	1,25	6000		0		0		k-v	0
29495211		chat.bilibili.com	jellycat兔子 能有同款好欣慰	945.72900,1,25,16777215,1519765255,0,b63c8ca3,4350871414,7	1519765255	945.72900	4350871414	,0,	b63c8ca3	16777215	1,25	6000		0		0		k-v	0
29495211		chat.bilibili.com	眼距有点近	202.02100,1,25,16777215,1519764361,0,b63c8ca3,4350865330,7	1519764361	202.02100	4350865330	,0,	b63c8ca3	16777215	1,25	6000		0		0		k-v	0
29495211		chat.bilibili.com	老公有点像妮妮诶	66.88100,1,25,16777215,1519764213,0,b63c8ca3,4350864257,7	1519764213	66.88100	4350864257	,0,	b63c8ca3	16777215	1,25	6000		0		0		k-v	0
29495211		chat.bilibili.com	The XX - Islands	1033.32700,1,25,16777215,1519749564,0,e1bbe3b0,4350572869,7	1519749564	1033.32700	4350572869	,0,	e1bbe3b0	16777215	1,25	6000		0		0		k-v	0
29495211		chat.bilibili.com	两家都很有钱，不结婚不生小孩不秀家庭，一样可以过得好好的，没必要假面吧。。	593.51400,1,25,16777215,1519745754,0,853506c2,4350374563,7	1519745754	593.51400	4350374563	,0,	853506c2	16777215	1,25	6000		0		0		k-v	0
29495211		chat.bilibili.com	前面有个China？	2720.38600,1,25,16777215,1519745176,0,9217c22c,4350336520,7	1519745176	2720.38600	4350336520	,0,	9217c22c	16777215	1,25	6000		0		0		k-v	0
29495211		chat.bilibili.com	有	1147.18200,1,25,16777215,1519743505,0,9217c22c,4350200635,7	1519743505	1147.18200	4350200635	,0,	9217c22c	16777215	1,25	6000		0		0		k-v	0
29495211		chat.bilibili.com	给非非选朋友	1828.50300,1,25,16777215,1519741688,0,4b00b07c,4350086292,7	1519741688	1828.50300	4350086292	,0,	4b00b07c	16777215	1,25	6000		0		0		k-v	0
29495211		chat.bilibili.com	小女孩长的好漂亮	1405.27300,1,25,16777215,1519740762,0,579872ab,4350025898,7	1519740762	1405.27300	4350025898	,0,	579872ab	16777215	1,25	6000		0		0		k-v	0
29495211		chat.bilibili.com	有	1153.13200,1,25,16777215,1519740488,0,579872ab,4350009119,7	1519740488	1153.13200	4350009119	,0,	579872ab	16777215	1,25	6000		0		0		k-v	0
29495211		chat.bilibili.com	女主人不瘦	741.17600,1,25,16777215,1519740072,0,579872ab,4349981579,7	1519740072	741.17600	4349981579	,0,	579872ab	16777215	1,25	6000		0		0		k-v	0
29495211		chat.bilibili.com	两个都这么有钱还需要假面？谁都不需要过分迁就谁	576.08300,1,25,16777215,1519738567,0,2fb74d32,4349888939,7	1519738567	576.08300	4349888939	,0,	2fb74d32	16777215	1,25	6000		0		0		k-v	0
29495211		chat.bilibili.com	Bossy 强势，男主调戏老婆强权~	877.26500,1,25,16777215,1519738538,0,667eaf62,4349887164,7	1519738538	877.26500	4349887164	,0,	667eaf62	16777215	1,25	6000		0		0		k-v	0
29495211		chat.bilibili.com	我觉得小孩子性格非常好，这个肯定不会骗人，父母有爱，家庭幸福充满爱才会有这样的小baby吧	669.38800,1,25,16777215,1519738218,0,667eaf62,4349867527,7	1519738218	669.38800	4349867527	,0,	667eaf62	16777215	1,25	6000		0		0		k-v	0
29495211		chat.bilibili.com	这么捧，主要还是因为人家出手壕	1115.61400,5,25,16777215,1519735584,0,2c62c986,4349714133,7	1519735584	1115.61400	4349714133	,0,	2c62c986	16777215	5,25	6000		0		0		k-v	0
29495211		chat.bilibili.com	没事就去艺术馆买两幅画玩玩	1065.81400,5,25,16777215,1519735493,0,2c62c986,4349709065,7	1519735493	1065.81400	4349709065	,0,	2c62c986	16777215	5,25	6000		0		0		k-v	0
29495211		chat.bilibili.com	牙好白	1423.18900,1,25,16777215,1519735363,0,cd18cab7,4349701917,7	1519735363	1423.18900	4349701917	,0,	cd18cab7	16777215	1,25	6000		0		0		k-v	0
29495211		chat.bilibili.com	一个fantastic就把画买了?	1064.61900,1,25,16777215,1519734993,0,cd18cab7,4349681124,7	1519734993	1064.61900	4349681124	,0,	cd18cab7	16777215	1,25	6000		0		0		k-v	0
29495211		chat.bilibili.com	我努力的告诉自己我只是来学英语口语的	182.42100,1,25,16777215,1519734046,0,cd18cab7,4349628349,7	1519734046	182.42100	4349628349	,0,	cd18cab7	16777215	1,25	6000		0		0		k-v	0
29495211		chat.bilibili.com	听不懂说什么，但是究竟是什么促使我看到现在	744.89700,1,25,16777215,1519733398,0,3a16c40b,4349594003,7	1519733398	744.89700	4349594003	,0,	3a16c40b	16777215	1,25	6000		0		0		k-v	0
29495211		chat.bilibili.com	男主人像赵又廷啊啊啊	922.75200,1,25,16777215,1519732775,0,66a2fa17,4349561025,7	1519732775	922.75200	4349561025	,0,	66a2fa17	16777215	1,25	6000		0		0		k-v	0
29495211		chat.bilibili.com	一般的英国管家一年是150万美金的收入	436.43800,5,25,14811775,1519732517,0,2c62c986,4349547367,7	1519732517	436.43800	4349547367	,0,	2c62c986	14811775	5,25	6000		0		0		k-v	0
29495211		chat.bilibili.com	有两名管家	318.50200,5,25,14811775,1519732368,0,2c62c986,4349539715,7	1519732368	318.50200	4349539715	,0,	2c62c986	14811775	5,25	6000		0		0		k-v	0
29495211		chat.bilibili.com	五十五名佣人为他们服务	311.90100,5,25,14811775,1519732343,0,2c62c986,4349538391,7	1519732343	311.90100	4349538391	,0,	2c62c986	14811775	5,25	6000		0		0		k-v	0
29495211		chat.bilibili.com	700万英镑	287.22100,5,25,14811775,1519732295,0,2c62c986,4349535842,7	1519732295	287.22100	4349535842	,0,	2c62c986	14811775	5,25	6000		0		0		k-v	0
29495211		chat.bilibili.com	实际上欧美人单眼皮还挺多的，你觉得不单那是人家眼窝	1097.45900,1,25,16777215,1519731336,0,8def5b58,4349485804,7	1519731336	1097.45900	4349485804	,0,	8def5b58	16777215	1,25	6000		0		0		k-v	0
29495211		chat.bilibili.com	大家不就是因为好奇进来的吗，标题都写着了还特意进来酸一句，有本事在北京买十几套四合院住啊	1028.70400,1,25,16777215,1519731247,0,8def5b58,4349481216,7	1519731247	1028.70400	4349481216	,0,	8def5b58	16777215	1,25	6000		0		0		k-v	0
29495211		chat.bilibili.com	人家随时派对全球旅行什么不行？想看演唱会就能要到最佳位置，所以你是觉得你很有趣吗	1028.70400,5,25,16777215,1519731184,0,8def5b58,4349477953,7	1519731184	1028.70400	4349477953	,0,	8def5b58	16777215	5,25	6000		0		0		k-v	0
29495211		chat.bilibili.com	说无聊的笑死我了，难道每天工作累死累活替别人打工也没时间陪爸妈去旅游就很有趣吗？	1028.70400,5,25,16777215,1519731095,0,8def5b58,4349473409,7	1519731095	1028.70400	4349473409	,0,	8def5b58	16777215	5,25	6000		0		0		k-v	0
29495211		chat.bilibili.com	人家就算不会做，又能怎样呢🙃🙃	834.69600,1,25,16777215,1519730493,0,e474614e,4349442860,7	1519730493	834.69600	4349442860	,0,	e474614e	16777215	1,25	6000		0		0		k-v	0
29495211		chat.bilibili.com	就想问他家干啥的这么有钱，还源源不断的钱	790.18200,1,25,16777215,1519730045,0,8def5b58,4349420530,7	1519730045	790.18200	4349420530	,0,	8def5b58	16777215	1,25	6000		0		0		k-v	0
29495211		chat.bilibili.com	男主人一直看着夫人，满眼宠溺，有钱又幸福性格又好，超羡慕了	644.65100,1,25,16777215,1519729874,0,8def5b58,4349411804,7	1519729874	644.65100	4349411804	,0,	8def5b58	16777215	1,25	6000		0		0		k-v	0
29495211		chat.bilibili.com	前面的你不是发底端弹幕怎么跑上来了，我觉得你更尴尬	626.62900,1,25,16777215,1519729814,0,8def5b58,4349408825,7	1519729814	626.62900	4349408825	,0,	8def5b58	16777215	1,25	6000		0		0		k-v	0
29495211		chat.bilibili.com	一直很喜欢这种玩具，有一个自己的真的超级棒	613.51300,1,25,16777215,1519729777,0,8def5b58,4349406933,7	1519729777	613.51300	4349406933	,0,	8def5b58	16777215	1,25	6000		0		0		k-v	0
29495211		chat.bilibili.com	底端弹幕你是有多酸啊，这都假面夫妻，你和你老公都融到骨子里三秒打一个啵是吗	556.75200,1,25,16777215,1519729692,0,8def5b58,4349402691,7	1519729692	556.75200	4349402691	,0,	8def5b58	16777215	1,25	6000		0		0		k-v	0
29495211		chat.bilibili.com	说人家没朋友的笑死我了，女主肯定有闺蜜或者好友有孩子啊，日常聚会一聚不就行了还没到上学时候	533.25200,1,25,16777215,1519729633,0,8def5b58,4349399747,7	1519729633	533.25200	4349399747	,0,	8def5b58	16777215	1,25	6000		0		0		k-v	0
29495211		chat.bilibili.com	没教养怎么叫名媛，小说那种泼妇女二是暴发户好吗	482.04600,1,25,16777215,1519729545,0,8def5b58,4349395014,7	1519729545	482.04600	4349395014	,0,	8def5b58	16777215	1,25	6000		0		0		k-v	0
29495211		chat.bilibili.com	女佣的工资都比我高，扎心了	421.24500,1,25,16777215,1519729484,0,8def5b58,4349392042,7	1519729484	421.24500	4349392042	,0,	8def5b58	16777215	1,25	6000		0		0		k-v	0
29495211		chat.bilibili.com	不好意思我有这样的生活我不累，一点也不累，弹幕别酸了笑死我了你们	362.01800,1,25,16777215,1519729424,0,8def5b58,4349389064,7	1519729424	362.01800	4349389064	,0,	8def5b58	16777215	1,25	6000		0		0		k-v	0
29495211		chat.bilibili.com	听懂了马杀鸡	347.11200,1,25,16777215,1519729368,0,8def5b58,4349386300,7	1519729368	347.11200	4349386300	,0,	8def5b58	16777215	1,25	6000		0		0		k-v	0
29495211		chat.bilibili.com	男主丑？也不看看自己什么样子，我倒觉得有点像高司令	270.70200,1,25,16777215,1519729290,0,8def5b58,4349382446,7	1519729290	270.70200	4349382446	,0,	8def5b58	16777215	1,25	6000		0		0		k-v	0
29495211		chat.bilibili.com	！	798.43700,1,25,16777215,1519726430,0,3f5e77e4,4349234583,7	1519726430	798.43700	4349234583	,0,	3f5e77e4	16777215	1,25	6000		0		0		k-v	0
29495211		chat.bilibili.com	唐顿庄园。。	380.99600,1,25,16777215,1519723620,0,20c5c3ed,4349113635,7	1519723620	380.99600	4349113635	,0,	20c5c3ed	16777215	1,25	6000		0		0		k-v	0
29495211		chat.bilibili.com	我没钱，所以在b站刷弹幕	7.31900,1,25,16777215,1519722746,0,b6b21e30,4349076392,7	1519722746	7.31900	4349076392	,0,	b6b21e30	16777215	1,25	6000		0		0		k-v	0
29495211		chat.bilibili.com	女主很在意老公啊 那个眼神 不错	1514.19800,1,25,16777215,1519649286,0,5ecfe030,4346681506,7	1519649286	1514.19800	4346681506	,0,	5ecfe030	16777215	1,25	6000		0		0		k-v	0
29495211		chat.bilibili.com	感谢野生字幕君	213.27800,1,25,16777215,1519648003,0,3361e79d,4346610771,7	1519648003	213.27800	4346610771	,0,	3361e79d	16777215	1,25	6000		0		0		k-v	0
29495211		chat.bilibili.com	选同伴出席明天活动	1873.41200,1,25,16777215,1519645401,0,77f5eaa4,4346474024,7	1519645401	1873.41200	4346474024	,0,	77f5eaa4	16777215	1,25	6000		0		0		k-v	0
29495211		chat.bilibili.com	女儿就是女主的中心，所有关注都给女儿了	1468.85000,1,25,16777215,1519644736,0,77f5eaa4,4346441016,7	1519644736	1468.85000	4346441016	,0,	77f5eaa4	16777215	1,25	6000		0		0		k-v	0
29495211		chat.bilibili.com	副业开画廊	1096.56200,1,25,16777215,1519644318,0,77f5eaa4,4346420364,7	1519644318	1096.56200	4346420364	,0,	77f5eaa4	16777215	1,25	6000		0		0		k-v	0
29495211		chat.bilibili.com	弹幕里有的人真是酸……	963.34300,1,25,15138834,1519633289,0,1789d578,4345919016,7	1519633289	963.34300	4345919016	,0,	1789d578	15138834	1,25	6000		0		0		k-v	0
29495211		chat.bilibili.com	家里有四十个仆人的人穿着维密为啥要用居然哈哈哈	898.22400,1,25,16777215,1519633208,0,1789d578,4345915067,7	1519633208	898.22400	4345915067	,0,	1789d578	16777215	1,25	6000		0		0		k-v	0
29495211		chat.bilibili.com	卧槽……	581.40500,1,25,16777215,1519632879,0,1789d578,4345901809,7	1519632879	581.40500	4345901809	,0,	1789d578	16777215	1,25	6000		0		0		k-v	0
29495211		chat.bilibili.com	好喜欢她涂的口红💄	861.92800,1,18,16777215,1519606857,0,b3462c17,4344929255,7	1519606857	861.92800	4344929255	,0,	b3462c17	16777215	1,18	6000		0		0		k-v	0
29495211		chat.bilibili.com	求野生弹幕君赐我一波翻译	18.06200,1,25,16777215,1519540812,0,f8e351cc,4342539452,7	1519540812	18.06200	4342539452	,0,	f8e351cc	16777215	1,25	6000		0		0		k-v	0
29495211		chat.bilibili.com	感谢翻译，辛苦了	33.06600,1,25,15138834,1519398113,0,64d50dd9,4336801920,7	1519398113	33.06600	4336801920	,0,	64d50dd9	15138834	1,25	6000		0		0		k-v	0
29495211		chat.bilibili.com	哪里接地气了啊哈哈哈	675.03400,1,25,16777215,1519277985,0,50c0de88,4330722972,7	1519277985	675.03400	4330722972	,0,	50c0de88	16777215	1,25	6000		0		0		k-v	0
29495211		chat.bilibili.com	好像传送门小姐姐啊	1616.73000,1,25,16777215,1519139167,0,a24fec00,4325127552,7	1519139167	1616.73000	4325127552	,0,	a24fec00	16777215	1,25	6000		0		0		k-v	0
29495211		chat.bilibili.com	这是有多少套居家服…	1284.39200,1,25,16777215,1519138945,0,a24fec00,4325105636,7	1519138945	1284.39200	4325105636	,0,	a24fec00	16777215	1,25	6000		0		0		k-v	0
29495211		chat.bilibili.com	。。	15.14200,1,25,16777215,1519133926,0,4b6e21c,4324701473,7	1519133926	15.14200	4324701473	,0,	4b6e21c	16777215	1,25	6000		0		0		k-v	0
29495211		chat.bilibili.com	还是爸爸玩的开心😂	2436.64500,1,25,16777215,1519105324,0,d020b584,4322957631,7	1519105324	2436.64500	4322957631	,0,	d020b584	16777215	1,25	6000		0		0		k-v	0
29495211		chat.bilibili.com	真公主是没有公主病的	835.66300,1,25,16777215,1519103784,0,d020b584,4322871759,7	1519103784	835.66300	4322871759	,0,	d020b584	16777215	1,25	6000		0		0		k-v	0
29495211		chat.bilibili.com	他拍他pp～～	1563.49600,1,25,16777215,1518862373,0,dac8e2ae,4311035386,7	1518862373	1563.49600	4311035386	,0,	dac8e2ae	16777215	1,25	6000		0		0		k-v	0
29495211		chat.bilibili.com	感觉挺恩爱的	583.43100,1,25,16777215,1518622343,0,d2be2e37,4299808250,7	1518622343	583.43100	4299808250	,0,	d2be2e37	16777215	1,25	6000		0		0		k-v	0
29495211		chat.bilibili.com	i cant help to see her liittle fce	208.11600,1,25,16777215,1518610097,0,5a182528,4298992787,7	1518610097	208.11600	4298992787	,0,	5a182528	16777215	1,25	6000		0		0		k-v	0
29495211		chat.bilibili.com	好好赚钱，让自己儿女过上这样的生活😂	675.93100,1,25,16777215,1518418104,0,afb0ecf8,4290485951,7	1518418104	675.93100	4290485951	,0,	afb0ecf8	16777215	1,25	6000		0		0		k-v	0
29495211		chat.bilibili.com	听不懂😂	246.15600,1,25,16777215,1518417765,0,afb0ecf8,4290467801,7	1518417765	246.15600	4290467801	,0,	afb0ecf8	16777215	1,25	6000		0		0		k-v	0
29495211		chat.bilibili.com	我还一直认为这样得生活只存在在小说中。。。	319.62000,1,25,16777215,1518182279,0,69cef04f,4280562662,7	1518182279	319.62000	4280562662	,0,	69cef04f	16777215	1,25	6000		0		0		k-v	0
29495211		chat.bilibili.com	播尼？？次元壁碎了……	293.62800,1,25,16777215,1518171285,0,9ebb4933,4279722871,7	1518171285	293.62800	4279722871	,0,	9ebb4933	16777215	1,25	6000		0		0		k-v	0
29495211		chat.bilibili.com	不漱口啊？	121.94300,1,25,16777215,1517842847,0,37843d90,4258600724,7	1517842847	121.94300	4258600724	,0,	37843d90	16777215	1,25	6000		0		0		k-v	0
29495211		chat.bilibili.com	说花钱雇朋友和生日派对的键盘侠们先去学学英文提升一下自己吧，再说她本来就是找点事情干而已，干嘛要用对你的要求要求别人	2384.86000,1,25,16777215,1517816967,0,aa638a32,4257087861,7	1517816967	2384.86000	4257087861	,0,	aa638a32	16777215	1,25	6000		0		0		k-v	0
29495211		chat.bilibili.com	为了给菲菲拍照的	2364.37300,1,25,16777215,1517811848,0,3d604360,4256768818,7	1517811848	2364.37300	4256768818	,0,	3d604360	16777215	1,25	6000		0		0		k-v	0
29495211		chat.bilibili.com	这是菲菲的生日，拍照的是迪士尼专业摄像师	2348.74600,1,25,16777215,1517811823,0,3d604360,4256767573,7	1517811823	2348.74600	4256767573	,0,	3d604360	16777215	1,25	6000		0		0		k-v	0
29495211		chat.bilibili.com	没人了？	1588.78000,1,25,16777215,1517811082,0,3d604360,4256731656,7	1517811082	1588.78000	4256731656	,0,	3d604360	16777215	1,25	6000		0		0		k-v	0
29495211		chat.bilibili.com	为什么突然出现一堆弹幕😂	383.78200,1,25,16777215,1517807120,0,69e6392d,4256527976,7	1517807120	383.78200	4256527976	,0,	69e6392d	16777215	1,25	6000		0		0		k-v	0
29495211		chat.bilibili.com	马卡龙，想吃_(´_`」 ∠)_	2078.13600,1,25,16777215,1517733502,0,f592b11f,4253746426,7	1517733502	2078.13600	4253746426	,0,	f592b11f	16777215	1,25	6000		0		0		k-v	0
29495211		chat.bilibili.com	嫉妒使我质壁分离	594.27600,1,25,16777215,1517732791,0,f592b11f,4253710580,7	1517732791	594.27600	4253710580	,0,	f592b11f	16777215	1,25	6000		0		0		k-v	0
29495211		chat.bilibili.com	@	3.06400,1,25,16777215,1517714541,0,5b3cd60e,4252804048,7	1517714541	3.06400	4252804048	,0,	5b3cd60e	16777215	1,25	6000		0		0		k-v	0
29495211		chat.bilibili.com	事实上，她家有40个仆人	776.92500,1,25,16777215,1517619472,0,c11183d,4249210044,7	1517619472	776.92500	4249210044	,0,	c11183d	16777215	1,25	6000		0		0		k-v	0
29495211		chat.bilibili.com	做饭只是爱好而已	769.32400,1,25,16777215,1517619437,0,c11183d,4249209349,7	1517619437	769.32400	4249209349	,0,	c11183d	16777215	1,25	6000		0		0		k-v	0
29495211		chat.bilibili.com	这是在给童装拍广告。。。什么雇玩伴啊。。。	2357.07200,1,25,16777215,1517615278,0,20ca6c8f,4249140118,7	1517615278	2357.07200	4249140118	,0,	20ca6c8f	16777215	1,25	6000		0		0		k-v	0
29495211		chat.bilibili.com	KK？	2443.43900,1,25,16777215,1517592992,0,e952a28a,4248876397,7	1517592992	2443.43900	4248876397	,0,	e952a28a	16777215	1,25	6000		0		0		k-v	0
29495211		chat.bilibili.com	小女孩性格不太好啊	2367.68100,1,25,16777215,1517592797,0,e952a28a,4248870567,7	1517592797	2367.68100	4248870567	,0,	e952a28a	16777215	1,25	6000		0		0		k-v	0
29495211		chat.bilibili.com	哪里看出假面的	584.98700,1,25,16777215,1517457922,0,e047c219,4243249522,7	1517457922	584.98700	4243249522	,0,	e047c219	16777215	1,25	6000		0		0		k-v	0
29495211		chat.bilibili.com	没字幕？	134.78900,1,25,16777215,1517288790,0,85841c6c,4231511585,7	1517288790	134.78900	4231511585	,0,	85841c6c	16777215	1,25	6000		0		0		k-v	0
29495211		chat.bilibili.com	所以我一穷鬼到底在这里干啥？？	1152.74800,1,25,16777215,1517274325,0,4ebe1039,4231105214,7	1517274325	1152.74800	4231105214	,0,	4ebe1039	16777215	1,25	6000		0		0		k-v	0
29495211		chat.bilibili.com	反正到男主人说话我就各种听不懂了	1254.15300,1,25,16777215,1517259625,0,603cff5b,4226497956,7	1517259625	1254.15300	4226497956	,0,	603cff5b	16777215	1,25	6000		0		0		k-v	0
29495211		chat.bilibili.com	有	1148.64100,1,25,16777215,1517259493,0,603cff5b,4226497334,7	1517259493	1148.64100	4226497334	,0,	603cff5b	16777215	1,25	6000		0		0		k-v	0
29495211		chat.bilibili.com	来温州呗有钱人家的少爷挺多	125.62800,1,25,16777215,1517214103,0,d9b922c4,4224838074,7	1517214103	125.62800	4224838074	,0,	d9b922c4	16777215	1,25	6000		0		0		k-v	0
29495211		chat.bilibili.com	当然有	1152.28900,1,25,16777215,1517115855,0,bc3a5072,4221052058,7	1517115855	1152.28900	4221052058	,0,	bc3a5072	16777215	1,25	6000		0		0		k-v	0
29495211		chat.bilibili.com	我的天	581.68100,1,25,16777215,1517115260,0,bc3a5072,4221019185,7	1517115260	581.68100	4221019185	,0,	bc3a5072	16777215	1,25	6000		0		0		k-v	0
29495211		chat.bilibili.com	蜜汁妮妮既视感	840.06600,1,25,16777215,1517020685,0,33be7c14,4217247546,7	1517020685	840.06600	4217247546	,0,	33be7c14	16777215	1,25	6000		0		0		k-v	0
29495211		chat.bilibili.com	娴熟个毛...	817.16200,1,25,16777215,1517020663,0,33be7c14,4217246685,7	1517020663	817.16200	4217246685	,0,	33be7c14	16777215	1,25	6000		0		0		k-v	0
29495211		chat.bilibili.com	凯特王妃的邻居	43.20700,1,25,16777215,1516979323,0,34ec3c62,4216360336,7	1516979323	43.20700	4216360336	,0,	34ec3c62	16777215	1,25	6000		0		0		k-v	0
29495211		chat.bilibili.com	bgm好听！	81.02600,1,25,16777215,1516882476,0,792bb5c4,4212811129,7	1516882476	81.02600	4212811129	,0,	792bb5c4	16777215	1,25	6000		0		0		k-v	0
29495211		chat.bilibili.com	名媛人生……	339.46200,1,25,16777215,1516862222,0,66c8b09,4211934101,6	1516862222	339.46200	4211934101	,0,	66c8b09	16777215	1,25	6000		0		0		k-v	0
29495211		chat.bilibili.com	起码两台摄像机	2625.45700,1,25,16777215,1516852440,0,8e8091ab,4211531797,6	1516852440	2625.45700	4211531797	,0,	8e8091ab	16777215	1,25	6000		0		0		k-v	0
29495211		chat.bilibili.com	布莱尔也没她这么壕啊，布莱尔才一个女佣	399.02100,1,25,16777215,1516791582,0,dc891376,4209769748,6	1516791582	399.02100	4209769748	,0,	dc891376	16777215	1,25	6000		0		0		k-v	0
29495211		chat.bilibili.com	这位也是惨，大亨独生女，找了四个男朋友都想骗钱	58.40000,1,25,16777215,1516787924,0,dc891376,4209613262,6	1516787924	58.40000	4209613262	,0,	dc891376	16777215	1,25	6000		0		0		k-v	0
29495211		chat.bilibili.com	Mommy is the boss!	32.41700,1,25,52479,1516713978,0,a8b3a43f,4207348366,6	1516713978	32.41700	4207348366	,0,	a8b3a43f	52479	1,25	6000		0		0		k-v	0
29495211		chat.bilibili.com	前面只咚菲菲的等等我。。	253.53800,1,25,16777215,1516699719,0,f1e814fe,4203889203,6	1516699719	253.53800	4203889203	,0,	f1e814fe	16777215	1,25	6000		0		0		k-v	0
29495211		chat.bilibili.com	同款gucci黑T恤，可惜我并买不起那么多=v=+	555.52600,1,25,16777215,1516692523,0,c1385569,4203608510,6	1516692523	555.52600	4203608510	,0,	c1385569	16777215	1,25	6000		0		0		k-v	0
29495211		chat.bilibili.com	怎么开心怎么过，为什么要减肥	1230.07300,1,25,16777215,1516689725,0,d00bca1,4203514001,6	1516689725	1230.07300	4203514001	,0,	d00bca1	16777215	1,25	6000		0		0		k-v	0
29495211		chat.bilibili.com	真有点像，但是感觉嘴巴不像	1680.86100,1,25,16777215,1516688666,0,28d6bf37,4203479252,6	1516688666	1680.86100	4203479252	,0,	28d6bf37	16777215	1,25	6000		0		0		k-v	0
29495211		chat.bilibili.com	好吧是穷，是羡慕	725.71800,1,25,16777215,1516678675,0,834f6cd7,4203113905,6	1516678675	725.71800	4203113905	,0,	834f6cd7	16777215	1,25	6000		0		0		k-v	0
29495211		chat.bilibili.com	是英语好吗？	702.70000,1,25,16777215,1516678652,0,834f6cd7,4203113276,6	1516678652	702.70000	4203113276	,0,	834f6cd7	16777215	1,25	6000		0		0		k-v	0
29495211		chat.bilibili.com	是什么让我看到了现在	684.59200,1,25,16777215,1516678632,0,834f6cd7,4203112773,6	1516678632	684.59200	4203112773	,0,	834f6cd7	16777215	1,25	6000		0		0		k-v	0
29495211		chat.bilibili.com	hhhhhhh	599.87000,1,25,16777215,1516673405,0,973088dd,4202975592,6	1516673405	599.87000	4202975592	,0,	973088dd	16777215	1,25	6000		0		0		k-v	0
29495211		chat.bilibili.com	前面的居然还能看到现在厉害了：）	2663.01500,1,25,16777215,1516642888,0,e23d8f87,4202650734,6	1516642888	2663.01500	4202650734	,0,	e23d8f87	16777215	1,25	6000		0		0		k-v	0
29495211		chat.bilibili.com	我们的家庭关系像三角形一样稳固	134.88300,1,25,8700107,1516630194,0,25bc3f1c,4202073008,6	1516630194	134.88300	4202073008	,0,	25bc3f1c	8700107	1,25	6000		0		0		k-v	0
29495211		chat.bilibili.com	花少的别跑！+1	710.70900,1,25,16777215,1516615015,0,e23d8f87,4201329611,6	1516615015	710.70900	4201329611	,0,	e23d8f87	16777215	1,25	6000		0		0		k-v	0
29495211		chat.bilibili.com	哇！！	580.50800,1,25,16777215,1516614844,0,e23d8f87,4201323223,6	1516614844	580.50800	4201323223	,0,	e23d8f87	16777215	1,25	6000		0		0		k-v	0
29495211		chat.bilibili.com	哇好辛苦_(:з」∠)_我替你八	343.54800,1,25,16777215,1516614549,0,e23d8f87,4201311934,6	1516614549	343.54800	4201311934	,0,	e23d8f87	16777215	1,25	6000		0		0		k-v	0
29495211		chat.bilibili.com	字幕组	1710.17000,1,25,16777215,1516547558,0,690afe07,4199750373,6	1516547558	1710.17000	4199750373	,0,	690afe07	16777215	1,25	6000		0		0		k-v	0
29495211		chat.bilibili.com	贫穷限制了我的想象	32.85600,1,25,16777215,1516544498,0,26b296b5,4199573111,6	1516544498	32.85600	4199573111	,0,	26b296b5	16777215	1,25	6000		0		0		k-v	0
29495211		chat.bilibili.com	比弗利好吗……	1382.21500,1,25,16777215,1516517573,0,dca430a3,4198358686,6	1516517573	1382.21500	4198358686	,0,	dca430a3	16777215	1,25	6000		0		0		k-v	0
29495211		chat.bilibili.com	笑死，这些算是他的事业好吗，挖掘艺术家的工作	1124.05400,1,25,16777215,1516494686,0,c865eda9,4197450051,6	1516494686	1124.05400	4197450051	,0,	c865eda9	16777215	1,25	6000		0		0		k-v	0
29495211		chat.bilibili.com	咳，一辈子都达不到人家的起点	633.89800,1,25,16777215,1516470026,0,551b4bdb,4197196352,6	1516470026	633.89800	4197196352	,0,	551b4bdb	16777215	1,25	6000		0		0		k-v	0
29495211		chat.bilibili.com	赌博…	2166.43000,1,25,16777215,1516449254,0,8c50ebce,4196119919,6	1516449254	2166.43000	4196119919	,0,	8c50ebce	16777215	1,25	6000		0		0		k-v	0
29495211		chat.bilibili.com	男主人去拉斯维加斯了吗……	1741.38300,1,25,16777215,1516449026,0,8c50ebce,4196109009,6	1516449026	1741.38300	4196109009	,0,	8c50ebce	16777215	1,25	6000		0		0		k-v	0
29495211		chat.bilibili.com	为什么感觉脸有些奇怪…	756.44100,1,25,16777215,1516448291,0,8c50ebce,4196073883,6	1516448291	756.44100	4196073883	,0,	8c50ebce	16777215	1,25	6000		0		0		k-v	0
29495211		chat.bilibili.com	你有吗？？？？？	2655.55100,1,25,16777215,1516420377,0,434752ee,4194917822,6	1516420377	2655.55100	4194917822	,0,	434752ee	16777215	1,25	6000		0		0		k-v	0
29495211		chat.bilibili.com	你家摆个摄像机 你看不看	2607.20600,1,25,16777215,1516420326,0,434752ee,4194916620,6	1516420326	2607.20600	4194916620	,0,	434752ee	16777215	1,25	6000		0		0		k-v	0
29495211		chat.bilibili.com	酸不酸该你什么事 你最酸	1611.70800,1,25,16777215,1516419637,0,434752ee,4194892059,6	1516419637	1611.70800	4194892059	,0,	434752ee	16777215	1,25	6000		0		0		k-v	0
29495211		chat.bilibili.com	别在弹幕上挑毛病了 服	1198.55400,1,25,16777215,1516419224,0,434752ee,4194878221,6	1516419224	1198.55400	4194878221	,0,	434752ee	16777215	1,25	6000		0		0		k-v	0
29495211		chat.bilibili.com	天啊 好可爱的小孩	1837.37600,1,25,16777215,1516413969,0,e4f48883,4194713528,6	1516413969	1837.37600	4194713528	,0,	e4f48883	16777215	1,25	6000		0		0		k-v	0
29495211		chat.bilibili.com	真是，，羡慕啊	593.55100,1,25,15138834,1516377911,0,83c9c4fc,4194155769,6	1516377911	593.55100	4194155769	,0,	83c9c4fc	15138834	1,25	6000		0		0		k-v	0
29495211		chat.bilibili.com	不是用菲菲和一群小朋友当模特吗挑玩伴什么鬼	1899.88300,1,25,16777215,1516362033,0,6d886304,4193306890,6	1516362033	1899.88300	4193306890	,0,	6d886304	16777215	1,25	6000		0		0		k-v	0
29495211		chat.bilibili.com	突然心酸	1.51400,1,25,3381759,1516361400,0,7784750b,4193276584,6	1516361400	1.51400	4193276584	,0,	7784750b	3381759	1,25	6000		0		0		k-v	0
29495211		chat.bilibili.com	有	1152.29600,1,25,16777215,1516342592,0,47dbc64,4192400614,6	1516342592	1152.29600	4192400614	,0,	47dbc64	16777215	1,25	6000		0		0		k-v	0
29495211		chat.bilibili.com	只是对着镜头做show不太适应所以不太自然而已啦	650.09000,1,25,16777215,1516326752,0,ac50f46f,4191842688,6	1516326752	650.09000	4191842688	,0,	ac50f46f	16777215	1,25	6000		0		0		k-v	0
29495211		chat.bilibili.com	弹幕怎么投胎的和模拟人生的，要笑死我了	60.13700,1,25,16777215,1516326194,0,ac50f46f,4191829618,6	1516326194	60.13700	4191829618	,0,	ac50f46f	16777215	1,25	6000		0		0		k-v	0
29495211		chat.bilibili.com	那位韩裔演员	1606.89300,1,25,16777215,1516302613,0,738f25fe,4191640507,6	1516302613	1606.89300	4191640507	,0,	738f25fe	16777215	1,25	6000		0		0		k-v	0
29495211		chat.bilibili.com	这个眼神，哪里尴尬了，别见不得别人好	639.45400,1,25,16777215,1516291162,0,e66d9929,4191395575,6	1516291162	639.45400	4191395575	,0,	e66d9929	16777215	1,25	6000		0		0		k-v	0
29495211		chat.bilibili.com	我有点嫉妒了(｡•́︿•̀｡)这一家不但有钱还很幸福	584.66400,1,25,16777215,1516285177,0,f77ef013,4191082835,6	1516285177	584.66400	4191082835	,0,	f77ef013	16777215	1,25	6000		0		0		k-v	0
29495211		chat.bilibili.com	男主人很像骚当	1055.49600,1,25,16777215,1516280924,0,74fbc7a2,4190862989,6	1516280924	1055.49600	4190862989	,0,	74fbc7a2	16777215	1,25	6000		0		0		k-v	0
29495211		chat.bilibili.com	想到了了不起的麦瑟尔夫人。。。	208.79400,1,25,16777215,1516280112,0,9877b7d1,4190824125,6	1516280112	208.79400	4190824125	,0,	9877b7d1	16777215	1,25	6000		0		0		k-v	0
29495211		chat.bilibili.com	这个身材在国外刚刚好吧？我觉得	1232.14100,1,25,16777215,1516275060,0,ea468a7d,4190556758,6	1516275060	1232.14100	4190556758	,0,	ea468a7d	16777215	1,25	6000		0		0		k-v	0
29495211		chat.bilibili.com	1	1156.52400,1,25,16777215,1516274836,0,ea468a7d,4190552760,6	1516274836	1156.52400	4190552760	,0,	ea468a7d	16777215	1,25	6000		0		0		k-v	0
29495211		chat.bilibili.com	woww	577.96800,1,25,16777215,1516274496,0,a917e08,4190532998,6	1516274496	577.96800	4190532998	,0,	a917e08	16777215	1,25	6000		0		0		k-v	0
29495211		chat.bilibili.com	如果我这么有钱 我也美美的 甜甜的啊 哈哈哈	722.35400,1,25,16777215,1516274381,0,ea468a7d,4190528056,6	1516274381	722.35400	4190528056	,0,	ea468a7d	16777215	1,25	6000		0		0		k-v	0
29495211		chat.bilibili.com	有	1147.37200,1,25,16777215,1516270706,0,7bc74356,4190382959,6	1516270706	1147.37200	4190382959	,0,	7bc74356	16777215	1,25	6000		0		0		k-v	0
29495211		chat.bilibili.com	嫉妒	584.63400,1,18,16777215,1516269851,0,7bc74356,4190352718,6	1516269851	584.63400	4190352718	,0,	7bc74356	16777215	1,18	6000		0		0		k-v	0
29495211		chat.bilibili.com	emmm，真人小朋友	2313.64200,1,25,16777215,1516263241,0,971fafcb,4190140641,6	1516263241	2313.64200	4190140641	,0,	971fafcb	16777215	1,25	6000		0		0		k-v	0
29495211		chat.bilibili.com	emmmm，拉斯维加斯	1744.73200,1,25,16777215,1516262828,0,971fafcb,4190129370,6	1516262828	1744.73200	4190129370	,0,	971fafcb	16777215	1,25	6000		0		0		k-v	0
29495211		chat.bilibili.com	emmmm，我为什么要伤害自己 2233333	778.90400,1,25,16777215,1516262104,0,971fafcb,4190109025,6	1516262104	778.90400	4190109025	,0,	971fafcb	16777215	1,25	6000		0		0		k-v	0
29495211		chat.bilibili.com	s p	1.73700,1,25,16777215,1516259976,0,227b44ff,4190050988,6	1516259976	1.73700	4190050988	,0,	227b44ff	16777215	1,25	6000		0		0		k-v	0
29495211		chat.bilibili.com	他朋友还挺帅的	1571.68700,1,25,16777215,1516247577,0,ee0f15cf,4189657164,6	1516247577	1571.68700	4189657164	,0,	ee0f15cf	16777215	1,25	6000		0		0		k-v	0
29495211		chat.bilibili.com	家里有专门伺候狗的 不用担心	997.57500,1,25,16777215,1516193739,0,70308823,4188454085,6	1516193739	997.57500	4188454085	,0,	70308823	16777215	1,25	6000		0		0		k-v	0
29495211		chat.bilibili.com	人家胖，但是有钱啊	1232.36900,1,25,16777215,1516191768,0,acbdc68c,4188363595,6	1516191768	1232.36900	4188363595	,0,	acbdc68c	16777215	1,25	6000		0		0		k-v	0
29495211		chat.bilibili.com	卡戴珊一家对日常摄像完全习惯…	1255.91500,1,25,16777215,1516173762,0,7adc4131,4187742550,6	1516173762	1255.91500	4187742550	,0,	7adc4131	16777215	1,25	6000		0		0		k-v	0
29495211		chat.bilibili.com	尴尬了，不会用。	784.91100,1,25,16777215,1516165739,0,3afb2c6,4187462023,6	1516165739	784.91100	4187462023	,0,	3afb2c6	16777215	1,25	6000		0		0		k-v	0
29495211		chat.bilibili.com	这儿童房比我家都大了	324.02200,1,25,16777215,1516158431,0,19724c0,4187216483,6	1516158431	324.02200	4187216483	,0,	19724c0	16777215	1,25	6000		0		0		k-v	0
29495211		chat.bilibili.com	耐心真好	1914.14000,1,25,16777215,1516158390,0,dd0681af,4187215540,6	1516158390	1914.14000	4187215540	,0,	dd0681af	16777215	1,25	6000		0		0		k-v	0
29495211		chat.bilibili.com	背后有人撒蝴蝶	299.42200,1,25,16777215,1516158387,0,19724c0,4187215494,6	1516158387	299.42200	4187215494	,0,	19724c0	16777215	1,25	6000		0		0		k-v	0
29495211		chat.bilibili.com	爹地这么矮？女儿这么高？	293.84800,1,25,16777215,1516158331,0,19724c0,4187214534,6	1516158331	293.84800	4187214534	,0,	19724c0	16777215	1,25	6000		0		0		k-v	0
29495211		chat.bilibili.com	睡觉戴着大金表？	165.63300,1,25,16777215,1516158178,0,19724c0,4187210338,6	1516158178	165.63300	4187210338	,0,	19724c0	16777215	1,25	6000		0		0		k-v	0
29495211		chat.bilibili.com	有	1153.16700,1,25,16777215,1516157380,0,b981254a,4187190165,6	1516157380	1153.16700	4187190165	,0,	b981254a	16777215	1,25	6000		0		0		k-v	0
29495211		chat.bilibili.com	马里布～	2678.56000,1,25,16777215,1516156773,0,8c3e092,4187179203,6	1516156773	2678.56000	4187179203	,0,	8c3e092	16777215	1,25	6000		0		0		k-v	0
29495211		chat.bilibili.com	哎哟小可怜 明明很乖的	2388.54500,1,25,16777215,1516156593,0,8c3e092,4187172577,6	1516156593	2388.54500	4187172577	,0,	8c3e092	16777215	1,25	6000		0		0		k-v	0
29495211		chat.bilibili.com	不真实吗？不不不，是贫穷限制了你的想象。	2445.34200,1,25,16777215,1516149967,0,138ca6e9,4187060366,6	1516149967	2445.34200	4187060366	,0,	138ca6e9	16777215	1,25	6000		0		0		k-v	0
29495211		chat.bilibili.com	这么大的房子，物业费应该很贵吧。	468.80900,1,25,16777215,1516146603,0,138ca6e9,4187028338,6	1516146603	468.80900	4187028338	,0,	138ca6e9	16777215	1,25	6000		0		0		k-v	0
29495211		chat.bilibili.com	我觉得这只是有钱人而已…	1196.43700,1,25,16777215,1516119068,0,f85e145d,4186700983,6	1516119068	1196.43700	4186700983	,0,	f85e145d	16777215	1,25	6000		0		0		k-v	0
29495211		chat.bilibili.com	老子的九年义务教育不是白学的(๑•́ω•̀๑)	69.12300,1,25,16777215,1516117788,0,cd076814,4186646728,6	1516117788	69.12300	4186646728	,0,	cd076814	16777215	1,25	6000		0		0		k-v	0
29495211		chat.bilibili.com	哈哈哈哈戴墨镜的后遗症	2422.16900,1,25,16777215,1516117256,0,e4c64dff,4186621912,6	1516117256	2422.16900	4186621912	,0,	e4c64dff	16777215	1,25	6000		0		0		k-v	0
29495211		chat.bilibili.com	感谢(❁´ω`❁)字幕君	27.77000,1,25,16777215,1516114665,0,e4c64dff,4186463912,6	1516114665	27.77000	4186463912	,0,	e4c64dff	16777215	1,25	6000		0		0		k-v	0
29495211		chat.bilibili.com	摩登家庭别走	748.84300,1,25,16777215,1516112411,0,6d886304,4186345637,6	1516112411	748.84300	4186345637	,0,	6d886304	16777215	1,25	6000		0		0		k-v	0
29495211		chat.bilibili.com	真正的有钱人	2249.34900,1,25,16777215,1516110859,0,a324f549,4186273330,6	1516110859	2249.34900	4186273330	,0,	a324f549	16777215	1,25	6000		0		0		k-v	0
29495211		chat.bilibili.com	错，有钱人把赌博当麻将棋牌玩两把开心，输了多人几块钱扔到心情好	2247.44900,1,25,16777215,1516110974,0,a324f549,4186272625,6	1516110974	2247.44900	4186272625	,0,	a324f549	16777215	1,25	6000		0		0		k-v	0
29495211		chat.bilibili.com	感觉比Blair更幸福	412.32200,1,25,16777215,1516110082,0,e245223d,4186224710,6	1516110082	412.32200	4186224710	,0,	e245223d	16777215	1,25	6000		0		0		k-v	0
29495211		chat.bilibili.com	说真我听不太懂英式发音，所以我的四级才不过	216.62000,1,25,16777215,1516109884,0,e245223d,4186211261,6	1516109884	216.62000	4186211261	,0,	e245223d	16777215	1,25	6000		0		0		k-v	0
29495211		chat.bilibili.com	跪求字幕	1246.00500,1,25,16777215,1516103463,0,a7dfd74b,4185915924,6	1516103463	1246.00500	4185915924	,0,	a7dfd74b	16777215	1,25	6000		0		0		k-v	0
29495211		chat.bilibili.com	能听懂个大概	1156.97100,1,25,16777215,1516099616,0,c177cbb8,4185747097,6	1516099616	1156.97100	4185747097	,0,	c177cbb8	16777215	1,25	6000		0		0		k-v	0
29495211		chat.bilibili.com	看到这我感觉我更喜欢普通人的生活	680.96000,1,25,16777215,1516099284,0,c177cbb8,4185734552,6	1516099284	680.96000	4185734552	,0,	c177cbb8	16777215	1,25	6000		0		0		k-v	0
29495211		chat.bilibili.com	你们总要在女人身上挑点毛病找到可以贬低女性的地方才高兴是吧	22.15100,1,25,16777215,1516095548,0,8db2a4b1,4185595697,6	1516095548	22.15100	4185595697	,0,	8db2a4b1	16777215	1,25	6000		0		0		k-v	0
29495211		chat.bilibili.com	说假面夫妻的那位你不仅没有钱也没有幸福家庭	576.04800,1,25,16777215,1516092218,0,5b9f0f88,4185499148,6	1516092218	576.04800	4185499148	,0,	5b9f0f88	16777215	1,25	6000		0		0		k-v	0
29495211		chat.bilibili.com	又不是那个什么素质超差的贵妇节目	458.33600,1,25,16777215,1516092072,0,5b9f0f88,4185495153,6	1516092072	458.33600	4185495153	,0,	5b9f0f88	16777215	1,25	6000		0		0		k-v	0
29495211		chat.bilibili.com	什么都没听懂，反正很厉害	430.08200,1,25,16777215,1516092022,0,5b9f0f88,4185493725,6	1516092022	430.08200	4185493725	,0,	5b9f0f88	16777215	1,25	6000		0		0		k-v	0
29495211		chat.bilibili.com	各位，晚上梦里见	62.87900,1,25,16777215,1516091252,0,5b9f0f88,4185482246,6	1516091252	62.87900	4185482246	,0,	5b9f0f88	16777215	1,25	6000		0		0		k-v	0
29495211		chat.bilibili.com	穿着鞋走在老板光脚踩的地毯上？	467.76400,1,25,16777215,1516083591,0,ab521823,4185238969,6	1516083591	467.76400	4185238969	,0,	ab521823	16777215	1,25	6000		0		0		k-v	0
29495211		chat.bilibili.com	看这个，其实也不知道什么感觉，每个人都不同吧。。。	668.57800,1,25,16777215,1516075575,0,15b25838,4184962350,6	1516075575	668.57800	4184962350	,0,	15b25838	16777215	1,25	6000		0		0		k-v	0
29495211		chat.bilibili.com	真的，全是地毯为什么要穿鞋啊，我也接受不了	472.00000,1,25,16777215,1516072738,0,a54ad2b5,4184889962,6	1516072738	472.00000	4184889962	,0,	a54ad2b5	16777215	1,25	6000		0		0		k-v	0
29495211		chat.bilibili.com	任谁被多台摄像机对着都不会很定的	1207.74800,1,25,16777215,1516064316,0,71886a59,4184740050,6	1516064316	1207.74800	4184740050	,0,	71886a59	16777215	1,25	6000		0		0		k-v	0
29495211		chat.bilibili.com	订制的迪士尼公主goyard	1020.90400,1,25,16777215,1516032581,0,850a7515,4184386942,6	1516032581	1020.90400	4184386942	,0,	850a7515	16777215	1,25	6000		0		0		k-v	0
29495211		chat.bilibili.com	他家的枕头chanel.....	1158.48700,1,25,16777215,1516032481,0,8f06e0a7,4184383257,6	1516032481	1158.48700	4184383257	,0,	8f06e0a7	16777215	1,25	6000		0		0		k-v	0
29495211		chat.bilibili.com	应该是越南的	1685.08800,1,25,16777215,1516031508,0,f749a4c3,4184342391,6	1516031508	1685.08800	4184342391	,0,	f749a4c3	16777215	1,25	6000		0		0		k-v	0
29495211		chat.bilibili.com	夹娃娃夹过	956.26700,1,25,16777215,1516029873,0,f136ff7a,4184283844,6	1516029873	956.26700	4184283844	,0,	f136ff7a	16777215	1,25	6000		0		0		k-v	0
29495211		chat.bilibili.com	佩服自己差不多听懂l。。	309.56800,1,25,16777215,1516027621,0,a89ba3e9,4184147830,6	1516027621	309.56800	4184147830	,0,	a89ba3e9	16777215	1,25	6000		0		0		k-v	0
29495211		chat.bilibili.com	挑玩伴？！	1880.88300,1,25,16777215,1516027265,0,d30e4f1,4184128610,6	1516027265	1880.88300	4184128610	,0,	d30e4f1	16777215	1,25	6000		0		0		k-v	0
29495211		chat.bilibili.com	字幕君	860.73900,1,25,16777215,1516025513,0,744c1654,4184037636,6	1516025513	860.73900	4184037636	,0,	744c1654	16777215	1,25	6000		0		0		k-v	0
29495211		chat.bilibili.com	以前我在模擬人生也這麽瀟灑過	48.99200,1,25,16777215,1516025182,0,afe8c4a1,4184019939,6	1516025182	48.99200	4184019939	,0,	afe8c4a1	16777215	1,25	6000		0		0		k-v	0
29495211		chat.bilibili.com	我觉得可能是还不习惯镜头啦	1208.14100,1,25,16777215,1516024896,0,22622bc,4184005662,6	1516024896	1208.14100	4184005662	,0,	22622bc	16777215	1,25	6000		0		0		k-v	0
29495211		chat.bilibili.com	一个人？ 小孩子还是得多出去和朋友玩吧	508.58600,1,25,16777215,1516023881,0,22622bc,4183972567,6	1516023881	508.58600	4183972567	,0,	22622bc	16777215	1,25	6000		0		0		k-v	0
29495211		chat.bilibili.com	你们听不懂英语误会了很多信息	1874.24800,1,25,16777215,1516021575,0,ae5d3cfb,4183842361,6	1516021575	1874.24800	4183842361	,0,	ae5d3cfb	16777215	1,25	6000		0		0		k-v	0
29495211		chat.bilibili.com	他们是贵族啊，受过良好教育。不会撕逼的	450.35100,1,25,16777215,1516020133,0,ae5d3cfb,4183775220,6	1516020133	450.35100	4183775220	,0,	ae5d3cfb	16777215	1,25	6000		0		0		k-v	0
29495211		chat.bilibili.com	爸爸不见了。	1265.29600,1,25,16777215,1516019408,0,6193696d,4183741342,6	1516019408	1265.29600	4183741342	,0,	6193696d	16777215	1,25	6000		0		0		k-v	0
29495211		chat.bilibili.com	翻译爸爸 爸爸。。。	1253.85400,1,25,16777215,1516019397,0,6193696d,4183740831,6	1516019397	1253.85400	4183740831	,0,	6193696d	16777215	1,25	6000		0		0		k-v	0
29495211		chat.bilibili.com	哭。。。。。	1231.92900,1,25,16777215,1516019375,0,6193696d,4183739832,6	1516019375	1231.92900	4183739832	,0,	6193696d	16777215	1,25	6000		0		0		k-v	0
29495211		chat.bilibili.com	字母君？？？？	1220.95200,1,25,16777215,1516019364,0,6193696d,4183739314,6	1516019364	1220.95200	4183739314	,0,	6193696d	16777215	1,25	6000		0		0		k-v	0
29495211		chat.bilibili.com	你们这一说!!	1677.47100,1,25,16777215,1516018674,0,5cc1a678,4183708329,6	1516018674	1677.47100	4183708329	,0,	5cc1a678	16777215	1,25	6000		0		0		k-v	0
29495211		chat.bilibili.com	可能只是人家开心地抑制不住笑吧 笑久了也累啊	1433.66300,1,25,16777215,1516018430,0,5cc1a678,4183696681,6	1516018430	1433.66300	4183696681	,0,	5cc1a678	16777215	1,25	6000		0		0		k-v	0
29495211		chat.bilibili.com	感谢野生字幕组	180.45300,1,25,16777215,1516016358,0,6193696d,4183606006,6	1516016358	180.45300	4183606006	,0,	6193696d	16777215	1,25	6000		0		0		k-v	0
29495211		chat.bilibili.com	邦尼兔	957.79200,5,25,16777215,1516012902,0,3b7d7407,4183462200,6	1516012902	957.79200	4183462200	,0,	3b7d7407	16777215	5,25	6000		0		0		k-v	0
29495211		chat.bilibili.com	这些邦尼兔加起来一千多	944.17200,4,25,16777215,1516012876,0,3b7d7407,4183461188,6	1516012876	944.17200	4183461188	,0,	3b7d7407	16777215	4,25	6000		0		0		k-v	0
29495211		chat.bilibili.com	这种房子每天都会有人不会脏啊 那么多仆人	473.67900,5,25,16707842,1516011846,0,3b7d7407,4183421034,6	1516011846	473.67900	4183421034	,0,	3b7d7407	16707842	5,25	6000		0		0		k-v	0
29495211		chat.bilibili.com	我老公的歌！	1519.28400,1,25,16777215,1516011763,0,f472bcd0,4183417923,6	1516011763	1519.28400	4183417923	,0,	f472bcd0	16777215	1,25	6000		0		0		k-v	0
29495211		chat.bilibili.com	抱枕chanel	421.95800,5,25,16707842,1516011737,0,3b7d7407,4183416938,6	1516011737	421.95800	4183416938	,0,	3b7d7407	16707842	5,25	6000		0		0		k-v	0
29495211		chat.bilibili.com	一堆爱马仕	368.36900,5,25,16707842,1516011644,0,3b7d7407,4183413355,6	1516011644	368.36900	4183413355	,0,	3b7d7407	16707842	5,25	6000		0		0		k-v	0
29495211		chat.bilibili.com	我也会看完	1160.11900,1,25,16777215,1516011229,0,4da6f9b,4183398235,6	1516011229	1160.11900	4183398235	,0,	4da6f9b	16777215	1,25	6000		0		0		k-v	0
29495211		chat.bilibili.com	厉害	4.63700,5,25,16707842,1516011094,0,3b7d7407,4183398024,6	1516011094	4.63700	4183398024	,0,	3b7d7407	16707842	5,25	6000		0		0		k-v	0
29495211		chat.bilibili.com	刚刚那个一闪而过的小哥好帅	366.09800,1,25,16777215,1516010589,0,f472bcd0,4183374503,6	1516010589	366.09800	4183374503	,0,	f472bcd0	16777215	1,25	6000		0		0		k-v	0
29495211		chat.bilibili.com	想找熟肉吃ππ	66.70100,1,25,16777215,1516005891,0,d668af7a,4183232996,6	1516005891	66.70100	4183232996	,0,	d668af7a	16777215	1,25	6000		0		0		k-v	0
29495211		chat.bilibili.com	菲菲很有气质啊	2497.63400,1,25,16777215,1516005227,0,40885c51,4183214505,6	1516005227	2497.63400	4183214505	,0,	40885c51	16777215	1,25	6000		0		0		k-v	0
29495211		chat.bilibili.com	拜托这不是派对好吗	2389.98600,1,25,16777215,1516004944,0,40885c51,4183210321,6	1516004944	2389.98600	4183210321	,0,	40885c51	16777215	1,25	6000		0		0		k-v	0
29495211		chat.bilibili.com	只是在拍宣传照好吗，什么雇佣玩伴	2341.50300,1,25,16777215,1516004868,0,40885c51,4183208263,6	1516004868	2341.50300	4183208263	,0,	40885c51	16777215	1,25	6000		0		0		k-v	0
29495211		chat.bilibili.com	高司令+10086	1249.93000,1,25,16777215,1515997231,0,30eacec6,4183004661,6	1515997231	1249.93000	4183004661	,0,	30eacec6	16777215	1,25	6000		0		0		k-v	0
29495211		chat.bilibili.com	有钱人不应是比平常人更有能力吗	815.85500,1,25,16777215,1515996618,0,d48ee7d3,4182991953,6	1515996618	815.85500	4182991953	,0,	d48ee7d3	16777215	1,25	6000		0		0		k-v	0
29495211		chat.bilibili.com	人家是要为拍摄campaign选角。。。别不懂乱说	1800.07400,1,25,16777215,1515992111,0,7a84af2f,4182840281,6	1515992111	1800.07400	4182840281	,0,	7a84af2f	16777215	1,25	6000		0		0		k-v	0
29495211		chat.bilibili.com	给你们看都在拍商业广告照片的剧情就没意思了	2413.77500,1,25,16777215,1515991559,0,5aca42f6,4182832321,6	1515991559	2413.77500	4182832321	,0,	5aca42f6	16777215	1,25	6000		0		0		k-v	0
29495211		chat.bilibili.com	这是在拍服装的照片吧	2332.96900,1,25,16777215,1515991428,0,5aca42f6,4182827260,6	1515991428	2332.96900	4182827260	,0,	5aca42f6	16777215	1,25	6000		0		0		k-v	0
29495211		chat.bilibili.com	这个兔子还是买的起的	946.87500,1,25,16777215,1515990323,0,5aca42f6,4182771893,6	1515990323	946.87500	4182771893	,0,	5aca42f6	16777215	1,25	6000		0		0		k-v	0
29495211		chat.bilibili.com	可爱	2489.25300,1,25,16777215,1515989280,0,268b3123,4182749574,6	1515989280	2489.25300	4182749574	,0,	268b3123	16777215	1,25	6000		0		0		k-v	0
29495211		chat.bilibili.com	为做梦提供素材塑形	1157.39200,1,25,16777215,1515950223,0,3cdc312,4182263772,6	1515950223	1157.39200	4182263772	,0,	3cdc312	16777215	1,25	6000		0		0		k-v	0
29495211		chat.bilibili.com	我现在感觉很好	2170.46500,4,18,16777215,1515949113,0,58494c7e,4182236962,6	1515949113	2170.46500	4182236962	,0,	58494c7e	16777215	4,18	6000		0		0		k-v	0
29495211		chat.bilibili.com	多棒啊！看这些泡泡！	2065.32500,4,18,16777215,1515948919,0,58494c7e,4182231428,6	1515948919	2065.32500	4182231428	,0,	58494c7e	16777215	4,18	6000		0		0		k-v	0		有标点符号
29495211		chat.bilibili.com	我想她快乐 享受其中 这会是美好的经历	2055.02700,4,18,16777215,1515948986,0,58494c7e,4182229664,6	1515948986	2055.02700	4182229664	,0,	58494c7e	16777215	4,18	6000		0		0		k-v	0
29495211		chat.bilibili.com	如果她对某事感到不舒服 并说妈妈我不想做 我不会强迫她	2041.06000,4,18,16777215,1515948814,0,58494c7e,4182224404,6	1515948814	2041.06000	4182224404	,0,	58494c7e	16777215	4,18	6000		0		0		k-v	0
29495211		chat.bilibili.com	我不会让菲菲做任何她不想做的事	2039.98400,4,18,16777215,1515948732,0,58494c7e,4182222504,6	1515948732	2039.98400	4182222504	,0,	58494c7e	16777215	4,18	6000		0		0		k-v	0
29495211		chat.bilibili.com	要跟小朋友们一起玩吗	2034.94400,4,18,16777215,1515948689,0,58494c7e,4182220697,6	1515948689	2034.94400	4182220697	,0,	58494c7e	16777215	4,18	6000		0		0		k-v	0
29495211		chat.bilibili.com	今天是菲菲日噢 一整天都是关于你的节日	2031.32100,4,18,16777215,1515948647,0,58494c7e,4182219443,6	1515948647	2031.32100	4182219443	,0,	58494c7e	16777215	4,18	6000		0		0		k-v	0
29495211		chat.bilibili.com	我也是	1959.88300,4,18,16777215,1515948366,0,58494c7e,4182210659,6	1515948366	1959.88300	4182210659	,0,	58494c7e	16777215	4,18	6000		0		0		k-v	0
29495211		chat.bilibili.com	和你一起玩	1957.00400,4,18,16777215,1515948216,0,58494c7e,4182210032,6	1515948216	1957.00400	4182210032	,0,	58494c7e	16777215	4,18	6000		0		0		k-v	0
29495211		chat.bilibili.com	菲菲 你今天最喜欢什么	1954.77500,4,18,16777215,1515948313,0,58494c7e,4182209034,6	1515948313	1954.77500	4182209034	,0,	58494c7e	16777215	4,18	6000		0		0		k-v	0
29495211		chat.bilibili.com	生活不会再比这美好	1940.40100,4,18,16777215,1515948224,0,58494c7e,4182206198,6	1515948224	1940.40100	4182206198	,0,	58494c7e	16777215	4,18	6000		0		0		k-v	0
29495211		chat.bilibili.com	妈妈 加油 我帮你	1911.09800,4,18,16777215,1515947981,0,58494c7e,4182198142,6	1515947981	1911.09800	4182198142	,0,	58494c7e	16777215	4,18	6000		0		0		k-v	0
29495211		chat.bilibili.com	妈妈 把我埋起来吧	1907.94800,4,18,16777215,1515947889,0,58494c7e,4182194986,6	1515947889	1907.94800	4182194986	,0,	58494c7e	16777215	4,18	6000		0		0		k-v	0
29495211		chat.bilibili.com	明显之前从没用过哈哈	781.92000,1,25,16777215,1515940185,0,ac98d2e4,4181838896,6	1515940185	781.92000	4181838896	,0,	ac98d2e4	16777215	1,25	6000		0		0		k-v	0
29495211		chat.bilibili.com	女主人口音感觉有些英美混合	385.80100,1,25,16777215,1515939769,0,ac98d2e4,4181816780,6	1515939769	385.80100	4181816780	,0,	ac98d2e4	16777215	1,25	6000		0		0		k-v	0
29495211		chat.bilibili.com	男主是单眼皮？欧美人有单眼皮？	1086.76200,1,25,16777215,1515935986,0,4e71470f,4181619345,6	1515935986	1086.76200	4181619345	,0,	4e71470f	16777215	1,25	6000		0		0		k-v	0
29495211		chat.bilibili.com	翻译爸爸来呀	1242.08300,1,25,16777215,1515934785,0,552f25a1,4181560203,6	1515934785	1242.08300	4181560203	,0,	552f25a1	16777215	1,25	6000		0		0		k-v	0
29495211		chat.bilibili.com	日本主妇会早起化妆然后再躺回去	127.30100,1,25,16777215,1515926617,0,6838c81b,4181177560,6	1515926617	127.30100	4181177560	,0,	6838c81b	16777215	1,25	6000		0		0		k-v	0
29495211		chat.bilibili.com	妆容很明显啊，看不出来的都是直男	124.56100,1,25,16777215,1515926267,0,6838c81b,4181176695,6	1515926267	124.56100	4181176695	,0,	6838c81b	16777215	1,25	6000		0		0		k-v	0
29495211		chat.bilibili.com	听得懂	26.36000,1,25,16777215,1515924232,0,dfe9cc86,4181072935,6	1515924232	26.36000	4181072935	,0,	dfe9cc86	16777215	1,25	6000		0		0		k-v	0
29495211		chat.bilibili.com	为啥连英文字幕都没？	275.78100,1,25,16777215,1515923751,0,aae5be4e,4181052276,6	1515923751	275.78100	4181052276	,0,	aae5be4e	16777215	1,25	6000		0		0		k-v	0
29495211		chat.bilibili.com	其实yw	275.34000,1,25,16777215,1515923730,0,aae5be4e,4181051357,5	1515923730	275.34000	4181051357	,0,	aae5be4e	16777215	1,25	6000		0		0		k-v	0
29495211		chat.bilibili.com	感谢弹幕的翻译	161.49300,1,25,16777215,1515923593,0,aae5be4e,4181045209,5	1515923593	161.49300	4181045209	,0,	aae5be4e	16777215	1,25	6000		0		0		k-v	0
29495211		chat.bilibili.com	明显是没用过面包机阿	779.24900,1,25,16777215,1515923590,0,e11af75e,4181045090,5	1515923590	779.24900	4181045090	,0,	e11af75e	16777215	1,25	6000		0		0		k-v	0
29495211		chat.bilibili.com	我也要	7.70800,1,25,16777215,1515923323,0,d522ef9f,4181032901,5	1515923323	7.70800	4181032901	,0,	d522ef9f	16777215	1,25	6000		0		0		k-v	0
29495211		chat.bilibili.com	她从旅行和经历中学到许多	1011.33800,4,25,16777215,1515923236,0,76debd77,4181029164,5	1515923236	1011.33800	4181029164	,0,	76debd77	16777215	4,25	6000		0		0		k-v	0
29495211		chat.bilibili.com	菲：我爱这些娃娃	1005.29200,4,25,16777215,1515923165,0,76debd77,4181026157,5	1515923165	1005.29200	4181026157	,0,	76debd77	16777215	4,25	6000		0		0		k-v	0
29495211		chat.bilibili.com	你认为我们拿够玩具了吗 菲：没有	1001.09300,4,25,16777215,1515922803,0,76debd77,4181025520,5	1515922803	1001.09300	4181025520	,0,	76debd77	16777215	4,25	6000		0		0		k-v	0
29495211		chat.bilibili.com	我真的相信旅行 和人会面与交流都是非常重要的	996.89100,4,25,16777215,1515923120,0,76debd77,4181024215,5	1515923120	996.89100	4181024215	,0,	76debd77	16777215	4,25	6000		0		0		k-v	0
29495211		chat.bilibili.com	给它们一个吻 然后我们把它们打包	986.17200,4,25,16777215,1515923039,0,76debd77,4181020782,5	1515923039	986.17200	4181020782	,0,	76debd77	16777215	4,25	6000		0		0		k-v	0
29495211		chat.bilibili.com	这些要放到包里吗？ 菲：是的	983.57200,4,25,16777215,1515922996,0,76debd77,4181019736,5	1515922996	983.57200	4181019736	,0,	76debd77	16777215	4,25	6000		0		0		k-v	0
29495211		chat.bilibili.com	她可以看许多有趣的地方	973.05300,4,25,16777215,1515922962,0,76debd77,4181018296,5	1515922962	973.05300	4181018296	,0,	76debd77	16777215	4,25	6000		0		0		k-v	0
29495211		chat.bilibili.com	出差的时候带着她	966.73200,4,25,16777215,1515922947,0,76debd77,4181016970,5	1515922947	966.73200	4181016970	,0,	76debd77	16777215	4,25	6000		0		0		k-v	0
29495211		chat.bilibili.com	我会抓住她还没去学校的时机	963.73300,4,25,16777215,1515922572,0,76debd77,4181015755,5	1515922572	963.73300	4181015755	,0,	76debd77	16777215	4,25	6000		0		0		k-v	0
29495211		chat.bilibili.com	菲：这个 不，这个太大了	948.33200,4,25,16777215,1515922873,0,76debd77,4181013717,5	1515922873	948.33200	4181013717	,0,	76debd77	16777215	4,25	6000		0		0		k-v	0
29495211		chat.bilibili.com	菲菲 挑选你的玩具 哪个你最喜欢	945.47800,4,25,16777215,1515922797,0,76debd77,4181010369,5	1515922797	945.47800	4181010369	,0,	76debd77	16777215	4,25	6000		0		0		k-v	0
29495211		chat.bilibili.com	我们吃饭不在同一时间	796.07800,1,25,16777215,1515922434,0,76debd77,4180995313,5	1515922434	796.07800	4180995313	,0,	76debd77	16777215	1,25	6000		0		0		k-v	0
29495211		chat.bilibili.com	我过去一直为Jay做早餐 但是现在我们的行程完全不同	790.12000,1,25,16777215,1515922404,0,76debd77,4180993195,5	1515922404	790.12000	4180993195	,0,	76debd77	16777215	1,25	6000		0		0		k-v	0
29495211		chat.bilibili.com	Jay是个夜猫子 现在我有了菲菲 她起的早 我也早起了	744.55300,1,25,16777215,1515922283,0,76debd77,4180982739,5	1515922283	744.55300	4180982739	,0,	76debd77	16777215	1,25	6000		0		0		k-v	0		多句
29495211		chat.bilibili.com	老公典型的欧洲人，老婆像美国人？？	1175.46400,1,25,16777215,1515921609,0,b7e6197e,4180953369,5	1515921609	1175.46400	4180953369	,0,	b7e6197e	16777215	1,25	6000		0		0		k-v	0
29495211		chat.bilibili.com	如果一个人一年付4万，那么55人就是220万，对他们九牛一毛	433.56100,1,25,16777215,1515921463,0,f3eecea6,4180947059,5	1515921463	433.56100	4180947059	,0,	f3eecea6	16777215	1,25	6000		0		0		k-v	0
29495211		chat.bilibili.com	花言巧语骗他买画？？	1116.86800,1,25,16777215,1515921065,0,b7e6197e,4180929909,5	1515921065	1116.86800	4180929909	,0,	b7e6197e	16777215	1,25	6000		0		0		k-v	0
29495211		chat.bilibili.com	别动画砸了赔不起的	1092.19300,1,25,16777215,1515921018,0,b7e6197e,4180927759,5	1515921018	1092.19300	4180927759	,0,	b7e6197e	16777215	1,25	6000		0		0		k-v	0
29495211		chat.bilibili.com	这狗是他家的装饰吧	990.02900,1,25,16777215,1515920885,0,b7e6197e,4180922010,5	1515920885	990.02900	4180922010	,0,	b7e6197e	16777215	1,25	6000		0		0		k-v	0
29495211		chat.bilibili.com	家门这么小真不大气	956.83100,1,25,16777215,1515920837,0,b7e6197e,4180919944,5	1515920837	956.83100	4180919944	,0,	b7e6197e	16777215	1,25	6000		0		0		k-v	0
29495211		chat.bilibili.com	看了这，很想知道中国的土豪怎么过奢侈生活啊	851.34300,1,25,16777215,1515920766,0,b7e6197e,4180916802,5	1515920766	851.34300	4180916802	,0,	b7e6197e	16777215	1,25	6000		0		0		k-v	0
29495211		chat.bilibili.com	喂狗都要打电话安排吧，有钱真麻烦	412.18700,1,25,16777215,1515920391,0,b7e6197e,4180900174,5	1515920391	412.18700	4180900174	,0,	b7e6197e	16777215	1,25	6000		0		0		k-v	0
29495211		chat.bilibili.com	我要是这么有钱就不会上节目的	165.79300,1,25,16777215,1515920251,0,b7e6197e,4180893804,5	1515920251	165.79300	4180893804	,0,	b7e6197e	16777215	1,25	6000		0		0		k-v	0
29495211		chat.bilibili.com	承包kk盛世美艳	2442.46400,1,25,16777215,1515917418,0,e8e29d24,4180764991,5	1515917418	2442.46400	4180764991	,0,	e8e29d24	16777215	1,25	6000		0		0		k-v	0
29495211		chat.bilibili.com	就是在看她女儿想跟谁玩而已	1863.98200,1,25,16777215,1515916860,0,a3adecdc,4180755488,5	1515916860	1863.98200	4180755488	,0,	a3adecdc	16777215	1,25	6000		0		0		k-v	0
29495211		chat.bilibili.com	麦粒的malibu	2668.20700,1,25,16777215,1515916588,0,f2fc68f0,4180726339,5	1515916588	2668.20700	4180726339	,0,	f2fc68f0	16777215	1,25	6000		0		0		k-v	0
29495211		chat.bilibili.com	看弹幕感觉像吃了八斤柠檬一样酸	1427.10000,1,25,16777215,1515914152,0,adeb833d,4180610989,5	1515914152	1427.10000	4180610989	,0,	adeb833d	16777215	1,25	6000		0		0		k-v	0
29495211		chat.bilibili.com	BGM搭得太好	77.64700,1,25,16777215,1515912649,0,c350db06,4180538277,5	1515912649	77.64700	4180538277	,0,	c350db06	16777215	1,25	6000		0		0		k-v	0
29495211		chat.bilibili.com	我会都看完的	1152.47500,1,25,16777215,1515912548,0,9b2817c,4180533296,5	1515912548	1152.47500	4180533296	,0,	9b2817c	16777215	1,25	6000		0		0		k-v	0
29495211		chat.bilibili.com	我都想要	587.23300,1,25,16777215,1515911421,0,268b3123,4180476559,5	1515911421	587.23300	4180476559	,0,	268b3123	16777215	1,25	6000		0		0		k-v	0
29495211		chat.bilibili.com	Love runs out	4.57700,1,25,16777215,1515910559,0,268b3123,4180429711,5	1515910559	4.57700	4180429711	,0,	268b3123	16777215	1,25	6000		0		0		k-v	0
29495211		chat.bilibili.com	请问怎么投胎	50.29000,1,25,16777215,1515910105,0,b68711b3,4180405636,5	1515910105	50.29000	4180405636	,0,	b68711b3	16777215	1,25	6000		0		0		k-v	0
29495211		chat.bilibili.com	说假的人，人家料理是充实生活，你料理只是为了吃饱干活吧	814.68700,1,25,16777215,1515907832,0,183b2758,4180290442,5	1515907832	814.68700	4180290442	,0,	183b2758	16777215	1,25	6000		0		0		k-v	0
29495211		chat.bilibili.com	字幕	449.12200,1,25,16777215,1515907749,0,fed1e1cb,4180279102,5	1515907749	449.12200	4180279102	,0,	fed1e1cb	16777215	1,25	6000		0		0		k-v	0
29495211		chat.bilibili.com	眉头有点太重了	1641.49900,1,25,16777215,1515905825,0,714df24d,4180173307,5	1515905825	1641.49900	4180173307	,0,	714df24d	16777215	1,25	6000		0		0		k-v	0
29495211		chat.bilibili.com	好像知道这个小公主长大后是什么样的	2255.17500,1,25,16777215,1515905188,0,a0e4ce68,4180139235,5	1515905188	2255.17500	4180139235	,0,	a0e4ce68	16777215	1,25	6000		0		0		k-v	0
29495211		chat.bilibili.com	很明显的摆拍啊，不能不信，不能全信。	118.44200,1,25,16777215,1515898332,0,1e6d706b,4179812254,5	1515898332	118.44200	4179812254	,0,	1e6d706b	16777215	1,25	6000		0		0		k-v	0
29495211		chat.bilibili.com	小孩子稍微时间相处一下 就玩开了	2475.67900,1,25,16777215,1515896818,0,5b9355b8,4179749810,5	1515896818	2475.67900	4179749810	,0,	5b9355b8	16777215	1,25	6000		0		0		k-v	0
29495211		chat.bilibili.com	但是到了那种阶层的 真心的朋友会非常少 毕竟同level数量就少	1802.24200,1,25,16777215,1515896447,0,5b9355b8,4179735135,5	1515896447	1802.24200	4179735135	,0,	5b9355b8	16777215	1,25	6000		0		0		k-v	0
29495211		chat.bilibili.com	一会儿要面试选朋友了	1633.28300,1,25,16777215,1515896068,0,5b9355b8,4179725276,5	1515896068	1633.28300	4179725276	,0,	5b9355b8	16777215	1,25	6000		0		0		k-v	0
29495211		chat.bilibili.com	这套房子女主买的 7000万英镑 最近估值3亿英镑了	359.60700,1,25,16777215,1515895707,0,5b9355b8,4179706932,5	1515895707	359.60700	4179706932	,0,	5b9355b8	16777215	1,25	6000		0		0		k-v	0
29495211		chat.bilibili.com	小猪佩奇！碗！	743.64400,1,25,16777215,1515893744,0,71d10156,4179650430,5	1515893744	743.64400	4179650430	,0,	71d10156	16777215	1,25	6000		0		0		k-v	0
29495211		chat.bilibili.com	这一声杰~好像摩登家庭里的歌洛利亚	742.51900,1,25,16777215,1515893103,0,a0e4ce68,4179619922,5	1515893103	742.51900	4179619922	,0,	a0e4ce68	16777215	1,25	6000		0		0		k-v	0
29495211		chat.bilibili.com	有	1153.36800,1,25,16777215,1515866259,0,4c1e2e23,4179300080,5	1515866259	1153.36800	4179300080	,0,	4c1e2e23	16777215	1,25	6000		0		0		k-v	0
29495211		chat.bilibili.com	不是上镜胖十斤，现实中应该刚好	1229.91200,1,25,16777215,1515860167,0,c0db2a92,4179083164,5	1515860167	1229.91200	4179083164	,0,	c0db2a92	16777215	1,25	6000		0		0		k-v	0
29495211		chat.bilibili.com	同感^_^^_^^_^^_^^_^^_^	1748.41100,1,25,16777215,1515858182,0,7435808b,4178981711,5	1515858182	1748.41100	4178981711	,0,	7435808b	16777215	1,25	6000		0		0		k-v	0
29495211		chat.bilibili.com	jiajiemao好评	1743.80900,1,25,16777215,1515858171,0,7435808b,4178981102,5	1515858171	1743.80900	4178981102	,0,	7435808b	16777215	1,25	6000		0		0		k-v	0
29495211		chat.bilibili.com	一直带戒指好评	1540.76700,1,25,16777215,1515857955,0,7435808b,4178969216,5	1515857955	1540.76700	4178969216	,0,	7435808b	16777215	1,25	6000		0		0		k-v	0
29495211		chat.bilibili.com	呼叫野生字幕君～	1860.62600,1,25,16777215,1515855721,0,57fa5b84,4178859123,5	1515855721	1860.62600	4178859123	,0,	57fa5b84	16777215	1,25	6000		0		0		k-v	0
29495211		chat.bilibili.com	椰子鞋	510.25700,1,25,16777215,1515854922,0,986bb268,4178789482,5	1515854922	510.25700	4178789482	,0,	986bb268	16777215	1,25	6000		0		0		k-v	0
29495211		chat.bilibili.com	弹幕好酸 别嫉妒了好吗	601.18700,1,25,16777215,1515854655,0,a61149c8,4178771635,5	1515854655	601.18700	4178771635	,0,	a61149c8	16777215	1,25	6000		0		0		k-v	0
29495211		chat.bilibili.com	人家不需要假面	561.31900,1,25,16777215,1515852878,0,b5581f2a,4178662082,5	1515852878	561.31900	4178662082	,0,	b5581f2a	16777215	1,25	6000		0		0		k-v	0
29495211		chat.bilibili.com	我的梦想闺蜜会面	1595.51800,1,25,16777215,1515852488,0,969777b0,4178637989,5	1515852488	1595.51800	4178637989	,0,	969777b0	16777215	1,25	6000		0		0		k-v	0
29495211		chat.bilibili.com	我觉得他们很有爱啊	571.47800,1,25,16777215,1515852485,0,43db859b,4178637767,5	1515852485	571.47800	4178637767	,0,	43db859b	16777215	1,25	6000		0		0		k-v	0
29495211		chat.bilibili.com	有呀	1146.99600,1,25,16777215,1515852027,0,fcba652d,4178630940,5	1515852027	1146.99600	4178630940	,0,	fcba652d	16777215	1,25	6000		0		0		k-v	0
29495211		chat.bilibili.com	永远不用烦怎么挣钱，而是烦花钱	2160.03900,1,25,16777215,1515851536,0,52abdbe,4178587984,5	1515851536	2160.03900	4178587984	,0,	52abdbe	16777215	1,25	6000		0		0		k-v	0
29495211		chat.bilibili.com	Evian的水啊。。。全程认识的只有这个	875.16000,1,25,16777215,1515851303,0,2b45dca2,4178566336,5	1515851303	875.16000	4178566336	,0,	2b45dca2	16777215	1,25	6000		0		0		k-v	0
29495211		chat.bilibili.com	哈哈哈	0.92800,1,25,16777215,1515850867,0,fcba652d,4178547999,5	1515850867	0.92800	4178547999	,0,	fcba652d	16777215	1,25	6000		0		0		k-v	0
29495211		chat.bilibili.com	这发型好看	2570.44900,1,25,16777215,1515850015,0,8036052a,4178489651,5	1515850015	2570.44900	4178489651	,0,	8036052a	16777215	1,25	6000		0		0		k-v	0
29495211		chat.bilibili.com	这小男孩很不错啊 好看 有魅力	2497.91400,1,25,16777215,1515849808,0,8036052a,4178484976,5	1515849808	2497.91400	4178484976	,0,	8036052a	16777215	1,25	6000		0		0		k-v	0
29495211		chat.bilibili.com	女主虽胖，颜值是真高。	1456.27400,1,25,16777215,1515849543,0,f58458d5,4178462353,5	1515849543	1456.27400	4178462353	,0,	f58458d5	16777215	1,25	6000		0		0		k-v	0
29495211		chat.bilibili.com	还有人坚持到这儿吗。	1141.55600,1,25,16777215,1515848968,0,f58458d5,4178448679,5	1515848968	1141.55600	4178448679	,0,	f58458d5	16777215	1,25	6000		0		0		k-v	0
29495211		chat.bilibili.com	jellycat?	960.28900,1,25,16777215,1515847150,0,f263a553,4178345908,5	1515847150	960.28900	4178345908	,0,	f263a553	16777215	1,25	6000		0		0		k-v	0
29495211		chat.bilibili.com	居然穿维秘	889.28800,1,25,16777215,1515847068,0,c265407d,4178322518,5	1515847068	889.28800	4178322518	,0,	c265407d	16777215	1,25	6000		0		0		k-v	0
29495211		chat.bilibili.com	唐顿庄园	368.43100,1,25,16777215,1515846225,0,e59dd193,4178275200,5	1515846225	368.43100	4178275200	,0,	e59dd193	16777215	1,25	6000		0		0		k-v	0
29495211		chat.bilibili.com	1	1677.96500,1,25,16777215,1515843185,0,7966dc7a,4178109398,5	1515843185	1677.96500	4178109398	,0,	7966dc7a	16777215	1,25	6000		0		0		k-v	0
29495211		chat.bilibili.com	甚至不是两个厨房	782.88300,1,25,16777215,1515842555,0,aed4ace2,4178076611,5	1515842555	782.88300	4178076611	,0,	aed4ace2	16777215	1,25	6000		0		0		k-v	0
29495211		chat.bilibili.com	委屈	2394.73700,1,25,16777215,1515842190,0,67395323,4178058162,5	1515842190	2394.73700	4178058162	,0,	67395323	16777215	1,25	6000		0		0		k-v	0
29495211		chat.bilibili.com	比佛利山庄。。。	1386.40200,1,25,16777215,1515839747,0,6270061c,4177943142,5	1515839747	1386.40200	4177943142	,0,	6270061c	16777215	1,25	6000		0		0		k-v	0
29495211		chat.bilibili.com	交朋友都不能随心所欲的	1811.53800,1,25,16777215,1515839373,0,b9d01382,4177918860,5	1515839373	1811.53800	4177918860	,0,	b9d01382	16777215	1,25	6000		0		0		k-v	0
29495211		chat.bilibili.com	这个女的的笑容………真的……	1740.26800,1,25,16777215,1515839159,0,b9d01382,4177914768,5	1515839159	1740.26800	4177914768	,0,	b9d01382	16777215	1,25	6000		0		0		k-v	0
29495211		chat.bilibili.com	symphony	254.31900,1,25,16777215,1515838946,0,6270061c,4177898701,5	1515838946	254.31900	4177898701	,0,	6270061c	16777215	1,25	6000		0		0		k-v	0
29495211		chat.bilibili.com	卧槽……好幸福	577.52600,1,25,16777215,1515838579,0,b9d01382,4177881335,5	1515838579	577.52600	4177881335	,0,	b9d01382	16777215	1,25	6000		0		0		k-v	0
29495211		chat.bilibili.com	这也就是拍摄的时候笑，况且人家幸福，爱笑咋了哈哈哈	1614.56300,1,25,16777215,1515837008,0,ba89cdc1,4177825163,5	1515837008	1614.56300	4177825163	,0,	ba89cdc1	16777215	1,25	6000		0		0		k-v	0
29495211		chat.bilibili.com	女的也有贼钱好吗，不要以为有钱人家只生男孩	904.08100,1,25,16777215,1515836920,0,ba89cdc1,4177805876,5	1515836920	904.08100	4177805876	,0,	ba89cdc1	16777215	1,25	6000		0		0		k-v	0
29495211		chat.bilibili.com	谁规定女主人非得做饭？人就是想给老公爱意而已，不是义务	824.85400,1,25,16777215,1515836814,0,ba89cdc1,4177800655,5	1515836814	824.85400	4177800655	,0,	ba89cdc1	16777215	1,25	6000		0		0		k-v	0
29495211		chat.bilibili.com	老哥这不是生日派对	2385.59800,1,25,16777215,1515836150,0,71f310e2,4177771735,5	1515836150	2385.59800	4177771735	,0,	71f310e2	16777215	1,25	6000		0		0		k-v	0
29495211		chat.bilibili.com	这只狗也好幸福……	102.31500,1,25,16777215,1515835958,0,b9d01382,4177763359,5	1515835958	102.31500	4177763359	,0,	b9d01382	16777215	1,25	6000		0		0		k-v	0
29495211		chat.bilibili.com	自己的品牌宣传照相挑人	1870.09400,1,25,16777215,1515835650,0,71f310e2,4177749792,5	1515835650	1870.09400	4177749792	,0,	71f310e2	16777215	1,25	6000		0		0		k-v	0
29495211		chat.bilibili.com	小姑娘真的好可爱啊啊啊啊啊	542.23000,1,25,16777215,1515835537,0,e1a30d90,4177744902,5	1515835537	542.23000	4177744902	,0,	e1a30d90	16777215	1,25	6000		0		0		k-v	0
29495211		chat.bilibili.com	哈哈哈哈哈哈我也是	236.19500,1,25,16777215,1515831688,0,9b2817c,4177582988,5	1515831688	236.19500	4177582988	,0,	9b2817c	16777215	1,25	6000		0		0		k-v	0
29495211		chat.bilibili.com	这小孩 当模特的	2511.25700,1,25,16777215,1515830836,0,8d961bd5,4177547539,5	1515830836	2511.25700	4177547539	,0,	8d961bd5	16777215	1,25	6000		0		0		k-v	0
29495211		chat.bilibili.com	wow 这小孩天生就会看镜头啊	2497.90600,1,25,16777215,1515830821,0,8d961bd5,4177546947,5	1515830821	2497.90600	4177546947	,0,	8d961bd5	16777215	1,25	6000		0		0		k-v	0
29495211		chat.bilibili.com	嫉妒	633.82800,1,25,16777215,1515830788,0,729d06d9,4177545506,5	1515830788	633.82800	4177545506	,0,	729d06d9	16777215	1,25	6000		0		0		k-v	0
29495211		chat.bilibili.com	孩子就是孩子 何必要她假装开心或者喜悦 自然就是最好的	2381.44200,1,25,16777215,1515830774,0,8d961bd5,4177544918,5	1515830774	2381.44200	4177544918	,0,	8d961bd5	16777215	1,25	6000		0		0		k-v	0
29495211		chat.bilibili.com	都是父母安排好的 so fake	2326.96100,1,25,16777215,1515830614,0,8d961bd5,4177537998,5	1515830614	2326.96100	4177537998	,0,	8d961bd5	16777215	1,25	6000		0		0		k-v	0
29495211		chat.bilibili.com	挺好看的 这些画	1084.12900,1,25,16777215,1515830242,0,8d961bd5,4177522399,5	1515830242	1084.12900	4177522399	,0,	8d961bd5	16777215	1,25	6000		0		0		k-v	0
29495211		chat.bilibili.com	而且不用自己整理打扫，玩完丢下就好	773.55700,5,25,16777215,1515828265,0,32374232,4177452181,5	1515828265	773.55700	4177452181	,0,	32374232	16777215	5,25	6000		0		0		k-v	0
29495211		chat.bilibili.com	屁自己烧饭，至少有俩厨房，一个给厨师用，一个自己用着玩	771.30800,5,25,16777215,1515828583,0,32374232,4177451049,5	1515828583	771.30800	4177451049	,0,	32374232	16777215	5,25	6000		0		0		k-v	0
29495211		chat.bilibili.com	前面？女主？ennnn	753.02600,1,25,16777215,1515828330,0,32374232,4177440432,5	1515828330	753.02600	4177440432	,0,	32374232	16777215	1,25	6000		0		0		k-v	0
29495211		chat.bilibili.com	来围观	11.86800,1,25,16777215,1515828214,0,8d961bd5,4177435671,5	1515828214	11.86800	4177435671	,0,	8d961bd5	16777215	1,25	6000		0		0		k-v	0
29495211		chat.bilibili.com	我小侄子家里也有同款滑梯和秋千。。。不过应该没她家贵	510.62400,1,25,16777215,1515828002,0,32374232,4177427479,5	1515828002	510.62400	4177427479	,0,	32374232	16777215	1,25	6000		0		0		k-v	0
29495211		chat.bilibili.com	emmmm已经没力气羡慕了，而且她陪孩子既足够负责，她自己也不太会有多累	499.11300,1,25,16777215,1515827614,0,32374232,4177424943,5	1515827614	499.11300	4177424943	,0,	32374232	16777215	1,25	6000		0		0		k-v	0
29495211		chat.bilibili.com	投胎真是门技术活。????	315.27100,1,25,16777215,1515826644,0,3ef1f25,4177384412,5	1515826644	315.27100	4177384412	,0,	3ef1f25	16777215	1,25	6000		0		0		k-v	0
29495211		chat.bilibili.com	比利弗山庄	1379.05600,1,25,16777215,1515820592,0,50e7fc2e,4177101255,5	1515820592	1379.05600	4177101255	,0,	50e7fc2e	16777215	1,25	6000		0		0		k-v	0
29495211		chat.bilibili.com	当然很奇怪这就是在挑人	1863.35800,1,25,16777215,1515819463,0,c9511f4b,4177053990,5	1515819463	1863.35800	4177053990	,0,	c9511f4b	16777215	1,25	6000		0		0		k-v	0
29495211		chat.bilibili.com	天还说觉得这个很奇怪	1861.40700,1,25,16777215,1515819570,0,c9511f4b,4177052978,5	1515819570	1861.40700	4177052978	,0,	c9511f4b	16777215	1,25	6000		0		0		k-v	0
29495211		chat.bilibili.com	女主身材比较不好看	743.43300,1,25,16777215,1515818343,0,c9511f4b,4177001929,5	1515818343	743.43300	4177001929	,0,	c9511f4b	16777215	1,25	6000		0		0		k-v	0
29495211		chat.bilibili.com	人家就是含着金汤匙出生的	668.09500,1,25,16777215,1515815594,0,1f3d2f86,4176881898,5	1515815594	668.09500	4176881898	,0,	1f3d2f86	16777215	1,25	6000		0		0		k-v	0
29495211		chat.bilibili.com	听得懂都不会来看吧，人家去过这种生活了????????	206.70200,1,25,16777215,1515815005,0,406d6102,4176860075,5	1515815005	206.70200	4176860075	,0,	406d6102	16777215	1,25	6000		0		0		k-v	0
29495211		chat.bilibili.com	菲菲面前那个像大象鼻子的是什么啊	796.56400,1,25,16777215,1515806625,0,cecd9891,4176603807,5	1515806625	796.56400	4176603807	,0,	cecd9891	16777215	1,25	6000		0		0		k-v	0
29495211		chat.bilibili.com	我也想坐那个银色的跑车	699.86600,1,25,16777215,1515806528,0,cecd9891,4176601570,5	1515806528	699.86600	4176601570	,0,	cecd9891	16777215	1,25	6000		0		0		k-v	0
29495211		chat.bilibili.com	这一刻我嫉妒了	589.72200,1,25,16777215,1515806435,0,cecd9891,4176599026,5	1515806435	589.72200	4176599026	,0,	cecd9891	16777215	1,25	6000		0		0		k-v	0
29495211		chat.bilibili.com	感觉如果有个儿子，父亲会很开心，跟儿子关系也肯定很好	2652.39700,1,25,16707842,1515777101,0,660cead4,4176268052,5	1515777101	2652.39700	4176268052	,0,	660cead4	16707842	1,25	6000		0		0		k-v	0
29495211		chat.bilibili.com	麦粒的歌~~~	2678.94000,1,25,16777215,1515776020,0,23ddeab7,4176229030,5	1515776020	2678.94000	4176229030	,0,	23ddeab7	16777215	1,25	6000		0		0		k-v	0
29495211		chat.bilibili.com	哇哇同款兔子可是我只有两只	950.03300,1,25,16777215,1515774396,0,a1fc2570,4176158140,5	1515774396	950.03300	4176158140	,0,	a1fc2570	16777215	1,25	6000		0		0		k-v	0
29495211		chat.bilibili.com	我也觉得没啥气质。。。	2649.33200,1,25,16777215,1515773027,0,1a7ef90c,4176104707,5	1515773027	2649.33200	4176104707	,0,	1a7ef90c	16777215	1,25	6000		0		0		k-v	0
29495211		chat.bilibili.com	女主为什么一直瞟镜头。。。。	2583.45500,1,25,16777215,1515773083,0,1a7ef90c,4176101609,5	1515773083	2583.45500	4176101609	,0,	1a7ef90c	16777215	1,25	6000		0		0		k-v	0
29495211		chat.bilibili.com	啊啊啊啊啊啊！我V	2438.84100,1,25,16777215,1515772924,0,1a7ef90c,4176094438,5	1515772924	2438.84100	4176094438	,0,	1a7ef90c	16777215	1,25	6000		0		0		k-v	0
29495211		chat.bilibili.com	是为某个活动拍的吧，之前好像听到campaign	2421.84400,1,25,16777215,1515772900,0,1a7ef90c,4176093350,5	1515772900	2421.84400	4176093350	,0,	1a7ef90c	16777215	1,25	6000		0		0		k-v	0
29495211		chat.bilibili.com	尴尬	2368.81000,1,25,16777215,1515772803,0,1a7ef90c,4176088870,5	1515772803	2368.81000	4176088870	,0,	1a7ef90c	16777215	1,25	6000		0		0		k-v	0
29495211		chat.bilibili.com	游泳池还可以这样改(●—●)	598.11800,1,25,16777215,1515772234,0,a2f71e34,4176061944,5	1515772234	598.11800	4176061944	,0,	a2f71e34	16777215	1,25	6000		0		0		k-v	0
29495211		chat.bilibili.com	我好奇的问一句:你们却会暖床会洗衣做饭的人吗？	91.99600,1,25,16777215,1515771880,0,15d5948b,4176061494,5	1515771880	91.99600	4176061494	,0,	15d5948b	16777215	1,25	6000		0		0		k-v	0
29495211		chat.bilibili.com	那个男孩真的很会摆pose	2503.53000,1,25,16777215,1515771521,0,6e102809,4176027076,5	1515771521	2503.53000	4176027076	,0,	6e102809	16777215	1,25	6000		0		0		k-v	0
29495211		chat.bilibili.com	嗯……香奈儿靠枕????	1019.85200,1,25,16777215,1515771343,0,e22ff660,4176018284,5	1515771343	1019.85200	4176018284	,0,	e22ff660	16777215	1,25	6000		0		0		k-v	0
29495211		chat.bilibili.com	菲菲总是一个人在别墅里玩 可能很难和其他小伙伴接触吧	2282.38300,1,25,16777215,1515771286,0,6e102809,4176015408,5	1515771286	2282.38300	4176015408	,0,	6e102809	16777215	1,25	6000		0		0		k-v	0
29495211		chat.bilibili.com	天哪 这是给女儿挑人吧 看女儿想不想要和他玩	1787.78000,1,25,16777215,1515770733,0,6e102809,4175987981,5	1515770733	1787.78000	4175987981	,0,	6e102809	16777215	1,25	6000		0		0		k-v	0
29495211		chat.bilibili.com	怎样	638.78100,1,25,16777215,1515770647,0,a01b2901,4175982536,5	1515770647	638.78100	4175982536	,0,	a01b2901	16777215	1,25	6000		0		0		k-v	0
29495211		chat.bilibili.com	要找这样的女婿啊惊恐	633.88200,1,25,16777215,1515770638,0,a01b2901,4175982097,5	1515770638	633.88200	4175982097	,0,	a01b2901	16777215	1,25	6000		0		0		k-v	0
29495211		chat.bilibili.com	就叫benny 兔哦，价钱好像两三百一只吧，不算太贵，英国买会再便宜一点	962.60000,1,25,16777215,1515770351,0,97b6656e,4175967057,5	1515770351	962.60000	4175967057	,0,	97b6656e	16777215	1,25	6000		0		0		k-v	0
29495211		chat.bilibili.com	这个女主一直笑笑的	863.49300,1,25,16777215,1515769743,0,6e102809,4175934504,5	1515769743	863.49300	4175934504	,0,	6e102809	16777215	1,25	6000		0		0		k-v	0
29495211		chat.bilibili.com	so weird ...	1854.85900,1,25,16777215,1515768511,0,1a7ef90c,4175885817,5	1515768511	1854.85900	4175885817	,0,	1a7ef90c	16777215	1,25	6000		0		0		k-v	0
29495211		chat.bilibili.com	阿呆高司令+1	1246.67900,1,25,16777215,1515768238,0,1a7ef90c,4175852955,5	1515768238	1246.67900	4175852955	,0,	1a7ef90c	16777215	1,25	6000		0		0		k-v	0
29495211		chat.bilibili.com	为什么女主眼神这么漂。。。	1189.81400,1,25,16777215,1515768160,0,1a7ef90c,4175848821,5	1515768160	1189.81400	4175848821	,0,	1a7ef90c	16777215	1,25	6000		0		0		k-v	0
29495211		chat.bilibili.com	你们在这拍马屁和诋毁，她能看见是怎样啊，能认真看吗	1235.71900,1,25,16777215,1515767306,0,d5a2ecf9,4175801815,5	1515767306	1235.71900	4175801815	,0,	d5a2ecf9	16777215	1,25	6000		0		0		k-v	0
29495211		chat.bilibili.com	天呐她居然能hold 住这种颜色的唇膏	268.56200,1,25,16777215,1515767199,0,f010961c,4175796176,5	1515767199	268.56200	4175796176	,0,	f010961c	16777215	1,25	6000		0		0		k-v	0
29495211		chat.bilibili.com	感觉她不想生二胎老公想哈哈哈	153.62300,1,25,16777215,1515767103,0,1a7ef90c,4175790904,5	1515767103	153.62300	4175790904	,0,	1a7ef90c	16777215	1,25	6000		0		0		k-v	0
29495211		chat.bilibili.com	不一定把，你们怎么知道人家化妆了	116.00500,1,25,16777215,1515764702,0,f1e04438,4175678494,5	1515764702	116.00500	4175678494	,0,	f1e04438	16777215	1,25	6000		0		0		k-v	0
29495211		chat.bilibili.com	国外都有专门的管家学校的，难道会认为他们的仆人是随便找的的嘛	855.61400,1,25,16777215,1515763982,0,6d2557df,4175620417,5	1515763982	855.61400	4175620417	,0,	6d2557df	16777215	1,25	6000		0		0		k-v	0
29495211		chat.bilibili.com	早晨一两点啊	1131.22800,1,25,16777215,1515763981,0,14ab1d77,4175619416,5	1515763981	1131.22800	4175619416	,0,	14ab1d77	16777215	1,25	6000		0		0		k-v	0
29495211		chat.bilibili.com	她一叫jay！我就想起摩登家庭 歌罗瑞亚喊jay！哈哈哈哈哈	741.80600,1,25,16777215,1515762033,0,8d938489,4175518334,5	1515762033	741.80600	4175518334	,0,	8d938489	16777215	1,25	6000		0		0		k-v	0
29495211		chat.bilibili.com	助理们穿鞋踩进来，然后她光脚~不嫌脏厚	468.19300,1,25,16777215,1515761705,0,8d938489,4175500464,5	1515761705	468.19300	4175500464	,0,	8d938489	16777215	1,25	6000		0		0		k-v	0
29495211		chat.bilibili.com	她结婚的时候好瘦啊hhhhh	282.26100,1,25,16777215,1515761230,0,8d938489,4175476628,5	1515761230	282.26100	4175476628	,0,	8d938489	16777215	1,25	6000		0		0		k-v	0
29495211		chat.bilibili.com	哪里不自然了，别酸了好不，人家和和美美一家人	1424.47000,1,25,16777215,1515760147,0,e29e3c7a,4175426956,5	1515760147	1424.47000	4175426956	,0,	e29e3c7a	16777215	1,25	6000		0		0		k-v	0
29495211		chat.bilibili.com	羡慕惹	67.33700,1,25,16777215,1515760173,0,f2a5edcb,4175422832,5	1515760173	67.33700	4175422832	,0,	f2a5edcb	16777215	1,25	6000		0		0		k-v	0
29495211		chat.bilibili.com	人家瘦不瘦都美	1229.17800,1,25,16777215,1515760049,0,e29e3c7a,4175415949,5	1515760049	1229.17800	4175415949	,0,	e29e3c7a	16777215	1,25	6000		0		0		k-v	0
29495211		chat.bilibili.com	表白1字幕君	48.54300,1,25,16777215,1515758841,0,e29e3c7a,4175356296,5	1515758841	48.54300	4175356296	,0,	e29e3c7a	16777215	1,25	6000		0		0		k-v	0
29495211		chat.bilibili.com	挑玩伴，试镜	1874.05300,1,25,16777215,1515758135,0,72f8b8a9,4175322653,5	1515758135	1874.05300	4175322653	,0,	72f8b8a9	16777215	1,25	6000		0		0		k-v	0
29495211		chat.bilibili.com	原以为有英文字幕，听力我不太行，想当阅读理解来着，看综艺机会都不给	382.92900,1,25,16777215,1515755945,0,dad4fc8c,4175222927,5	1515755945	382.92900	4175222927	,0,	dad4fc8c	16777215	1,25	6000		0		0		k-v	0
29495211		chat.bilibili.com	人家胖但是美啊	1225.26200,1,25,16777215,1515755512,0,cb0d491c,4175203430,5	1515755512	1225.26200	4175203430	,0,	cb0d491c	16777215	1,25	6000		0		0		k-v	0
29495211		chat.bilibili.com	说尴尬的戏真多	643.25300,1,25,16777215,1515754916,0,cb0d491c,4175177282,5	1515754916	643.25300	4175177282	,0,	cb0d491c	16777215	1,25	6000		0		0		k-v	0
29495211		chat.bilibili.com	说人家假面夫妻的什么心态	567.75400,1,25,16777215,1515754825,0,cb0d491c,4175173287,5	1515754825	567.75400	4175173287	,0,	cb0d491c	16777215	1,25	6000		0		0		k-v	0
29495211		chat.bilibili.com	这到底是在干嘛	1862.24100,1,25,16777215,1515754400,0,1198917a,4175155439,5	1515754400	1862.24100	4175155439	,0,	1198917a	16777215	1,25	6000		0		0		k-v	0
29495211		chat.bilibili.com	妈妈在瞟镜头	160.31000,1,25,16777215,1515752976,0,817ebec7,4175095956,5	1515752976	160.31000	4175095956	,0,	817ebec7	16777215	1,25	6000		0		0		k-v	0
29495211		chat.bilibili.com	父亲看着她们两个时眼里有爱	563.06400,1,25,16777215,1515752673,0,b002d56e,4175088980,5	1515752673	563.06400	4175088980	,0,	b002d56e	16777215	1,25	6000		0		0		k-v	0
29495211		chat.bilibili.com	只有年轻的小毛头才觉得瘦成排骨好看～	1226.22700,5,25,14811775,1515747100,0,b1cdef7c,4174903741,4	1515747100	1226.22700	4174903741	,0,	b1cdef7c	14811775	5,25	6000		0		0		k-v	0
29495211		chat.bilibili.com	会不会没有朋友啊，妈妈一直在	518.13000,1,25,16777215,1515747361,0,2671c5a8,4174901265,4	1515747361	518.13000	4174901265	,0,	2671c5a8	16777215	1,25	6000		0		0		k-v	0
29495211		chat.bilibili.com	在微博已经看过一次了	221.60700,1,25,16777215,1515747013,0,2671c5a8,4174890863,4	1515747013	221.60700	4174890863	,0,	2671c5a8	16777215	1,25	6000		0		0		k-v	0
29495211		chat.bilibili.com	怎么觉得黑衣女满脸不耐烦，不高兴	441.53200,5,25,15138834,1515746435,0,b1cdef7c,4174877525,4	1515746435	441.53200	4174877525	,0,	b1cdef7c	15138834	5,25	6000		0		0		k-v	0
29495211		chat.bilibili.com	爹倒是很矮，妈是模特	306.76200,1,25,16777215,1515744017,0,9a327da,4174809151,4	1515744017	306.76200	4174809151	,0,	9a327da	16777215	1,25	6000		0		0		k-v	0
29495211		chat.bilibili.com	她爹妈当年离婚案也轰动一时啊，妈妈拿了一大笔赡养费	295.86100,1,25,16777215,1515743973,0,9a327da,4174808454,4	1515743973	295.86100	4174808454	,0,	9a327da	16777215	1,25	6000		0		0		k-v	0
29495211		chat.bilibili.com	啦啦啦啦啦啦啦啦	5.53100,1,25,16777215,1515741180,0,92b6aa5,4174737664,4	1515741180	5.53100	4174737664	,0,	92b6aa5	16777215	1,25	6000		0		0		k-v	0
29495211		chat.bilibili.com	没人觉得他长得很像莎士比亚吗	1147.55500,1,25,16777215,1515739427,0,fe12bc6e,4174694020,4	1515739427	1147.55500	4174694020	,0,	fe12bc6e	16777215	1,25	6000		0		0		k-v	0
29495211		chat.bilibili.com	英国女人典型身材	34.90300,1,25,16777215,1515737271,0,b535bf3f,4174640337,4	1515737271	34.90300	4174640337	,0,	b535bf3f	16777215	1,25	6000		0		0		k-v	0
29495211		chat.bilibili.com	消磨时光+1	2495.07600,1,25,16777215,1515736494,0,65eba82f,4174624910,4	1515736494	2495.07600	4174624910	,0,	65eba82f	16777215	1,25	6000		0		0		k-v	0
29495211		chat.bilibili.com	额，高处不胜寒朋友都是雇来的⊙﹏⊙	2300.16200,1,25,16777215,1515736602,0,65eba82f,4174618595,4	1515736602	2300.16200	4174618595	,0,	65eba82f	16777215	1,25	6000		0		0		k-v	0
29495211		chat.bilibili.com	前面的也让我这么无聊吧+1????	1035.10700,1,25,16777215,1515735674,0,65eba82f,4174591667,4	1515735674	1035.10700	4174591667	,0,	65eba82f	16777215	1,25	6000		0		0		k-v	0
29495211		chat.bilibili.com	做饭是兴趣爱好	789.58900,1,25,16777215,1515735382,0,65eba82f,4174582718,4	1515735382	789.58900	4174582718	,0,	65eba82f	16777215	1,25	6000		0		0		k-v	0
29495211		chat.bilibili.com	贫穷限制了我的想象	550.63300,1,25,16777215,1515734775,0,65eba82f,4174574632,4	1515734775	550.63300	4174574632	,0,	65eba82f	16777215	1,25	6000		0		0		k-v	0
29495211		chat.bilibili.com	野生菌要挺住啊????	418.81300,1,25,16777215,1515734755,0,65eba82f,4174566818,4	1515734755	418.81300	4174566818	,0,	65eba82f	16777215	1,25	6000		0		0		k-v	0
29495211		chat.bilibili.com	????	290.09500,1,25,16777215,1515734730,0,65eba82f,4174562043,4	1515734730	290.09500	4174562043	,0,	65eba82f	16777215	1,25	6000		0		0		k-v	0
29495211		chat.bilibili.com	好可爱啊哈哈哈哈哈	157.56300,1,25,16777215,1515734501,0,f449cbc2,4174554337,4	1515734501	157.56300	4174554337	,0,	f449cbc2	16777215	1,25	6000		0		0		k-v	0
29495211		chat.bilibili.com	可是人家家里有人打扫啊emmm	132.22300,1,25,16777215,1515734471,0,f449cbc2,4174553328,4	1515734471	132.22300	4174553328	,0,	f449cbc2	16777215	1,25	6000		0		0		k-v	0
29495211		chat.bilibili.com	再多你就上天了	127.10300,1,25,16777215,1515734453,0,f449cbc2,4174552747,4	1515734453	127.10300	4174552747	,0,	f449cbc2	16777215	1,25	6000		0		0		k-v	0
29495211		chat.bilibili.com	爸爸挺有魅力的 妈妈也甜甜的 简直小说女主啊	693.60300,1,25,16777215,1515734304,0,264c2071,4174547672,4	1515734304	693.60300	4174547672	,0,	264c2071	16777215	1,25	6000		0		0		k-v	0
29495211		chat.bilibili.com	游泳房不好吗。。	582.35600,1,25,16777215,1515733898,0,c853eae4,4174533562,4	1515733898	582.35600	4174533562	,0,	c853eae4	16777215	1,25	6000		0		0		k-v	0
29495211		chat.bilibili.com	小说中的生活啊	356.74100,1,25,16777215,1515732365,0,f79c1eee,4174479096,4	1515732365	356.74100	4174479096	,0,	f79c1eee	16777215	1,25	6000		0		0		k-v	0
29495211		chat.bilibili.com	哈哈	2148.04000,1,25,16777215,1515731179,0,46ca090e,4174436911,4	1515731179	2148.04000	4174436911	,0,	46ca090e	16777215	1,25	6000		0		0		k-v	0
29495211		chat.bilibili.com	小孩子突然闹脾气不是很正常的一件事吗。。	2495.79900,1,25,16777215,1515730055,0,95350783,4174412926,4	1515730055	2495.79900	4174412926	,0,	95350783	16777215	1,25	6000		0		0		k-v	0
29495211		chat.bilibili.com	拜托相爱又不是只看长相胖瘦。。。。。	1238.41300,1,25,15138834,1515730207,0,1b64969,4174407377,4	1515730207	1238.41300	4174407377	,0,	1b64969	15138834	1,25	6000		0		0		k-v	0
29495211		chat.bilibili.com	泰国人吧？	1683.23100,1,25,16777215,1515729475,0,95350783,4174388296,4	1515729475	1683.23100	4174388296	,0,	95350783	16777215	1,25	6000		0		0		k-v	0
29495211		chat.bilibili.com	又不是演戏，为啥一定要投入，真人秀好吧	1453.11800,1,25,16777215,1515728445,0,520fc72b,4174362859,4	1515728445	1453.11800	4174362859	,0,	520fc72b	16777215	1,25	6000		0		0		k-v	0
29495211		chat.bilibili.com	刚刚那个提裤子的是流浪汉吗？	1890.47800,1,25,16777215,1515721646,0,11f34478,4174222228,4	1515721646	1890.47800	4174222228	,0,	11f34478	16777215	1,25	6000		0		0		k-v	0
29495211		chat.bilibili.com	是不是邦妮兔？	966.23500,1,25,16777215,1515721340,0,11f34478,4174217527,4	1515721340	966.23500	4174217527	,0,	11f34478	16777215	1,25	6000		0		0		k-v	0
29495211		chat.bilibili.com	真健壮	2379.22100,1,25,16777215,1515715113,0,32bc48fe,4174146761,4	1515715113	2379.22100	4174146761	,0,	32bc48fe	16777215	1,25	6000		0		0		k-v	0
29495211		chat.bilibili.com	比弗利山庄	2254.50600,1,25,16777215,1515714823,0,32bc48fe,4174144689,4	1515714823	2254.50600	4174144689	,0,	32bc48fe	16777215	1,25	6000		0		0		k-v	0
29495211		chat.bilibili.com	有钱人都爱赌博	2239.25100,1,25,16777215,1515714812,0,32bc48fe,4174144494,4	1515714812	2239.25100	4174144494	,0,	32bc48fe	16777215	1,25	6000		0		0		k-v	0
29495211		chat.bilibili.com	我是来练习听力的	741.95800,1,25,16777215,1515712689,0,32bc48fe,4174131475,4	1515712689	741.95800	4174131475	,0,	32bc48fe	16777215	1,25	6000		0		0		k-v	0
29495211		chat.bilibili.com	不是chung啦	1672.93900,1,25,16777215,1515705269,0,2f0c6034,4174101063,4	1515705269	1672.93900	4174101063	,0,	2f0c6034	16777215	1,25	6000		0		0		k-v	0
29495211		chat.bilibili.com	不是生日派對，是她媽自創品牌的廣告拍照	2389.68200,1,25,16777215,1515691396,0,759ddbf2,4173971734,4	1515691396	2389.68200	4173971734	,0,	759ddbf2	16777215	1,25	6000		0		0		k-v	0
29495211		chat.bilibili.com	老公剛才說的這段話很感人	1471.72500,1,25,16777215,1515690406,0,759ddbf2,4173950135,4	1515690406	1471.72500	4173950135	,0,	759ddbf2	16777215	1,25	6000		0		0		k-v	0
29495211		chat.bilibili.com	我家狗也叫石头 陨石苏牧 然而狗不同狗 贫穷的主人	226.16200,1,25,16777215,1515686054,0,585c9b9e,4173827595,4	1515686054	226.16200	4173827595	,0,	585c9b9e	16777215	1,25	6000		0		0		k-v	0
29495211		chat.bilibili.com	弹幕有病吧人家是千金小姐为什么要上烹饪班	827.14100,1,25,16777215,1515685021,0,368951f0,4173777550,4	1515685021	827.14100	4173777550	,0,	368951f0	16777215	1,25	6000		0		0		k-v	0
29495211		chat.bilibili.com	是三天的彩排+最后的wedding 啦	272.13700,4,25,16777215,1515684041,0,665e6717,4173729714,4	1515684041	272.13700	4173729714	,0,	665e6717	16777215	4,25	6000		0		0		k-v	0
29495211		chat.bilibili.com	是三天的彩排+最后的wedding 啦	256.55700,4,25,16777215,1515684027,0,665e6717,4173728331,4	1515684027	256.55700	4173728331	,0,	665e6717	16777215	4,25	6000		0		0		k-v	0
29495211		chat.bilibili.com	XX	1032.50100,1,25,16777215,1515683073,0,946b438b,4173684340,4	1515683073	1032.50100	4173684340	,0,	946b438b	16777215	1,25	6000		0		0		k-v	0
29495211		chat.bilibili.com	你觉得人家胖 可是外国人也并不觉得我们中国的瘦很美啊	1215.30900,1,25,16777215,1515679390,0,1ab601fd,4173504396,4	1515679390	1215.30900	4173504396	,0,	1ab601fd	16777215	1,25	6000		0		0		k-v	0
29495211		chat.bilibili.com	角落里的那个嘴唇我也很喜欢	1066.42300,1,25,16777215,1515679206,0,1ab601fd,4173495450,4	1515679206	1066.42300	4173495450	,0,	1ab601fd	16777215	1,25	6000		0		0		k-v	0
29495211		chat.bilibili.com	我喜欢这幅画	1055.37000,4,25,16777215,1515679181,0,1ab601fd,4173494266,4	1515679181	1055.37000	4173494266	,0,	1ab601fd	16777215	4,25	6000		0		0		k-v	0
29495211		chat.bilibili.com	沃德妈呀。。。	587.88300,1,25,14811775,1515679159,0,c4154661,4173493247,4	1515679159	587.88300	4173493247	,0,	c4154661	14811775	1,25	6000		0		0		k-v	0
29495211		chat.bilibili.com	活的还不如她家的狗	373.09800,1,25,14811775,1515678937,0,c4154661,4173482699,4	1515678937	373.09800	4173482699	,0,	c4154661	14811775	1,25	6000		0		0		k-v	0
29495211		chat.bilibili.com	请让我也做这样的选择题	364.45300,1,25,14811775,1515678921,0,c4154661,4173481887,4	1515678921	364.45300	4173481887	,0,	c4154661	14811775	1,25	6000		0		0		k-v	0
29495211		chat.bilibili.com	啊 我听到有东西撒出来了	767.93000,4,25,16777215,1515678493,0,1ab601fd,4173477864,4	1515678493	767.93000	4173477864	,0,	1ab601fd	16777215	4,25	6000		0		0		k-v	0
29495211		chat.bilibili.com	菲菲 wo菲菲 我要做点培根三明治 你要吃点吗？	764.33100,4,25,16777215,1515678815,0,1ab601fd,4173476881,4	1515678815	764.33100	4173476881	,0,	1ab601fd	16777215	4,25	6000		0		0		k-v	0
29495211		chat.bilibili.com	我要做些吐司	754.20700,4,25,16777215,1515678770,0,1ab601fd,4173474729,4	1515678770	754.20700	4173474729	,0,	1ab601fd	16777215	4,25	6000		0		0		k-v	0
29495211		chat.bilibili.com	说不爱钱不羡慕那是假的	757.87500,1,25,16777215,1515678757,0,37371686,4173474063,4	1515678757	757.87500	4173474063	,0,	37371686	16777215	1,25	6000		0		0		k-v	0
29495211		chat.bilibili.com	他就是讨厌一切软软的蛋糕	727.08600,4,25,16777215,1515678736,0,1ab601fd,4173473045,4	1515678736	727.08600	4173473045	,0,	1ab601fd	16777215	4,25	6000		0		0		k-v	0
29495211		chat.bilibili.com	你爸爸讨厌纸杯蛋糕	717.42700,4,25,16777215,1515678360,0,1ab601fd,4173471514,4	1515678360	717.42700	4173471514	,0,	1ab601fd	16777215	4,25	6000		0		0		k-v	0
29495211		chat.bilibili.com	切，给我两百年我也能盖这样一栋房子	81.70700,1,25,16777215,1515678504,0,c4154661,4173468019,4	1515678504	81.70700	4173468019	,0,	c4154661	16777215	1,25	6000		0		0		k-v	0
29495211		chat.bilibili.com	不能看了，羡慕嫉妒使我丑陋	633.13700,1,25,16777215,1515678609,0,37371686,4173466012,4	1515678609	633.13700	4173466012	,0,	37371686	16777215	1,25	6000		0		0		k-v	0
29495211		chat.bilibili.com	我是来找刺激的	9.65200,1,25,14811775,1515678531,0,c4154661,4173462437,4	1515678531	9.65200	4173462437	,0,	c4154661	14811775	1,25	6000		0		0		k-v	0
29495211		chat.bilibili.com	有没有看到那一排香奈儿的抱枕	1032.08600,1,25,16777215,1515671368,0,c6388c1e,4173150443,4	1515671368	1032.08600	4173150443	,0,	c6388c1e	16777215	1,25	6000		0		0		k-v	0
29495211		chat.bilibili.com	看	1179.35400,1,25,16777215,1515671147,0,ad6834a4,4173141519,4	1515671147	1179.35400	4173141519	,0,	ad6834a4	16777215	1,25	6000		0		0		k-v	0
29495211		chat.bilibili.com	我撤了，考不下了	1176.69400,1,25,16777215,1515671142,0,ad6834a4,4173141337,4	1515671142	1176.69400	4173141337	,0,	ad6834a4	16777215	1,25	6000		0		0		k-v	0
29495211		chat.bilibili.com	牙齿好白啊，像是做了贴片	1425.48900,1,25,16777215,1515669003,0,ef211d55,4173058349,4	1515669003	1425.48900	4173058349	,0,	ef211d55	16777215	1,25	6000		0		0		k-v	0
29495211		chat.bilibili.com	求兔子牌子	954.85300,1,25,16777215,1515668289,0,87e1f136,4173030659,4	1515668289	954.85300	4173030659	,0,	87e1f136	16777215	1,25	6000		0		0		k-v	0
29495211		chat.bilibili.com	越看越心酸	2132.59300,1,25,16777215,1515667060,0,5d9b7358,4172987747,4	1515667060	2132.59300	4172987747	,0,	5d9b7358	16777215	1,25	6000		0		0		k-v	0
29495211		chat.bilibili.com	没错	266.56500,1,25,16777215,1515667023,0,dab76a8a,4172986507,4	1515667023	266.56500	4172986507	,0,	dab76a8a	16777215	1,25	6000		0		0		k-v	0
29495211		chat.bilibili.com	他爹肯跳进粉色海洋球里点赞	685.23700,1,25,16777215,1515666444,0,9ce8719c,4172978474,4	1515666444	685.23700	4172978474	,0,	9ce8719c	16777215	1,25	6000		0		0		k-v	0
29495211		chat.bilibili.com	也让我这么无聊吧	1028.76000,1,25,16777215,1515665209,0,b9191a68,4172927771,4	1515665209	1028.76000	4172927771	,0,	b9191a68	16777215	1,25	6000		0		0		k-v	0
29495211		chat.bilibili.com	我想当他们的佣人	370.83100,1,25,16777215,1515665187,0,adaaca38,4172927083,4	1515665187	370.83100	4172927083	,0,	adaaca38	16777215	1,25	6000		0		0		k-v	0
29495211		chat.bilibili.com	猜啊????	200.96700,1,25,16777215,1515664364,0,adaaca38,4172901664,4	1515664364	200.96700	4172901664	,0,	adaaca38	16777215	1,25	6000		0		0		k-v	0
29495211		chat.bilibili.com	Samuel?	1213.20100,1,25,16777215,1515663506,0,da563f09,4172873891,4	1515663506	1213.20100	4172873891	,0,	da563f09	16777215	1,25	6000		0		0		k-v	0
29495211		chat.bilibili.com	应该结婚前上过烹饪培训班之类的	816.39000,1,25,16777215,1515663030,0,2dd8a447,4172860671,4	1515663030	816.39000	4172860671	,0,	2dd8a447	16777215	1,25	6000		0		0		k-v	0
29495211		chat.bilibili.com	捕捉这只野生kk	2441.48500,1,25,16777215,1515662742,0,e24d1b54,4172852928,4	1515662742	2441.48500	4172852928	,0,	e24d1b54	16777215	1,25	6000		0		0		k-v	0
29495211		chat.bilibili.com	kk	2441.48500,1,25,16777215,1515662731,0,e24d1b54,4172852630,4	1515662731	2441.48500	4172852630	,0,	e24d1b54	16777215	1,25	6000		0		0		k-v	0
29495211		chat.bilibili.com	羡慕完美人生啊	597.06200,1,25,16777215,1515662066,0,a77282d2,4172833535,4	1515662066	597.06200	4172833535	,0,	a77282d2	16777215	1,25	6000		0		0		k-v	0
29495211		chat.bilibili.com	好像应征遛狗的	381.21400,1,25,16777215,1515661839,0,a77282d2,4172827631,4	1515661839	381.21400	4172827631	,0,	a77282d2	16777215	1,25	6000		0		0		k-v	0
29495211		chat.bilibili.com	小姑娘穿的椰子鞋	517.19800,1,25,16777215,1515660698,0,b3ed62a3,4172798988,4	1515660698	517.19800	4172798988	,0,	b3ed62a3	16777215	1,25	6000		0		0		k-v	0
29495211		chat.bilibili.com	呦，还一见钟情	247.81300,1,25,16777215,1515660454,0,3f729d6f,4172792222,4	1515660454	247.81300	4172792222	,0,	3f729d6f	16777215	1,25	6000		0		0		k-v	0
29495211		chat.bilibili.com	我希望像她这样没内涵	2678.97200,1,25,16777215,1515660434,0,f66a5ede,4172792194,4	1515660434	2678.97200	4172792194	,0,	f66a5ede	16777215	1,25	6000		0		0		k-v	0
29495211		chat.bilibili.com	陪伴才是最重要的吧，不然不会这样对爸爸的	2624.47900,1,25,16777215,1515660317,0,2a3aa68b,4172788839,4	1515660317	2624.47900	4172788839	,0,	2a3aa68b	16777215	1,25	6000		0		0		k-v	0
29495211		chat.bilibili.com	哇 穿粉红色衣服的孩子真可爱	2538.24400,1,25,16777215,1515660230,0,2a3aa68b,4172786715,4	1515660230	2538.24400	4172786715	,0,	2a3aa68b	16777215	1,25	6000		0		0		k-v	0
29495211		chat.bilibili.com	超模的时候也是这样拍硬照的	2498.29100,1,25,16777215,1515660190,0,2a3aa68b,4172785669,4	1515660190	2498.29100	4172785669	,0,	2a3aa68b	16777215	1,25	6000		0		0		k-v	0
29495211		chat.bilibili.com	很专业啊	2482.54200,1,25,16777215,1515660175,0,2a3aa68b,4172785274,4	1515660175	2482.54200	4172785274	,0,	2a3aa68b	16777215	1,25	6000		0		0		k-v	0
29495211		chat.bilibili.com	哈哈哈 这样的限制我们玩不起	2443.29700,1,25,16777215,1515660137,0,2a3aa68b,4172784328,4	1515660137	2443.29700	4172784328	,0,	2a3aa68b	16777215	1,25	6000		0		0		k-v	0
29495211		chat.bilibili.com	不真实+1	2432.45000,1,25,16777215,1515660125,0,2a3aa68b,4172784070,4	1515660125	2432.45000	4172784070	,0,	2a3aa68b	16777215	1,25	6000		0		0		k-v	0
29495211		chat.bilibili.com	一点都不像生日派对，还是还是我的想法没有到达这个境界	2382.13200,1,25,16777215,1515660074,0,2a3aa68b,4172782869,4	1515660074	2382.13200	4172782869	,0,	2a3aa68b	16777215	1,25	6000		0		0		k-v	0
29495211		chat.bilibili.com	这样的生日派对真的不还玩吧	2347.97500,1,25,16777215,1515660041,0,2a3aa68b,4172781941,4	1515660041	2347.97500	4172781941	,0,	2a3aa68b	16777215	1,25	6000		0		0		k-v	0
29495211		chat.bilibili.com	看完这集就真的不想看了	2290.63900,1,25,16777215,1515659983,0,2a3aa68b,4172780581,4	1515659983	2290.63900	4172780581	,0,	2a3aa68b	16777215	1,25	6000		0		0		k-v	0
29495211		chat.bilibili.com	这样不叫朋友吧	2275.86100,1,25,16777215,1515659968,0,2a3aa68b,4172780222,4	1515659968	2275.86100	4172780222	,0,	2a3aa68b	16777215	1,25	6000		0		0		k-v	0
29495211		chat.bilibili.com	还有无数的奢侈品	2177.78900,1,25,16777215,1515659870,0,2a3aa68b,4172777846,4	1515659870	2177.78900	4172777846	,0,	2a3aa68b	16777215	1,25	6000		0		0		k-v	0
29495211		chat.bilibili.com	是不是感觉有点无聊	2155.63100,1,25,16777215,1515659848,0,2a3aa68b,4172777283,4	1515659848	2155.63100	4172777283	,0,	2a3aa68b	16777215	1,25	6000		0		0		k-v	0
29495211		chat.bilibili.com	就是想方设法的想怎么玩	2140.93800,1,25,16777215,1515659833,0,2a3aa68b,4172776931,4	1515659833	2140.93800	4172776931	,0,	2a3aa68b	16777215	1,25	6000		0		0		k-v	0
29495211		chat.bilibili.com	弹幕真不友好，用得着这样么	1629.72700,1,25,16777215,1515659271,0,f66a5ede,4172763158,4	1515659271	1629.72700	4172763158	,0,	f66a5ede	16777215	1,25	6000		0		0		k-v	0
29495211		chat.bilibili.com	亚洲面孔耶	1602.42500,1,25,16777215,1515659218,0,f66a5ede,4172761536,4	1515659218	1602.42500	4172761536	,0,	f66a5ede	16777215	1,25	6000		0		0		k-v	0
29495211		chat.bilibili.com	和女儿在一起很有趣	1948.35100,1,25,16777215,1515658844,0,2a3aa68b,4172752628,4	1515658844	1948.35100	4172752628	,0,	2a3aa68b	16777215	1,25	6000		0		0		k-v	0
29495211		chat.bilibili.com	我觉得当妈妈是一件很有挑战性的事情	1907.74100,1,25,16777215,1515658804,0,2a3aa68b,4172751691,4	1515658804	1907.74100	4172751691	,0,	2a3aa68b	16777215	1,25	6000		0		0		k-v	0
29495211		chat.bilibili.com	在给菲菲找玩伴吗？	1836.78900,1,25,16777215,1515658732,0,2a3aa68b,4172749956,4	1515658732	1836.78900	4172749956	,0,	2a3aa68b	16777215	1,25	6000		0		0		k-v	0
29495211		chat.bilibili.com	这个是在干嘛	1823.96600,1,25,16777215,1515658720,0,2a3aa68b,4172749649,4	1515658720	1823.96600	4172749649	,0,	2a3aa68b	16777215	1,25	6000		0		0		k-v	0
29495211		chat.bilibili.com	感觉太假了，脸上的肌肉酸了	1774.43900,1,25,16777215,1515658670,0,2a3aa68b,4172748461,4	1515658670	1774.43900	4172748461	,0,	2a3aa68b	16777215	1,25	6000		0		0		k-v	0
29495211		chat.bilibili.com	对的	1744.98100,1,25,16777215,1515658641,0,2a3aa68b,4172747756,4	1515658641	1744.98100	4172747756	,0,	2a3aa68b	16777215	1,25	6000		0		0		k-v	0
29495211		chat.bilibili.com	BGM名字？	1654.36900,1,18,16777215,1515658550,0,2a3aa68b,4172745637,4	1515658550	1654.36900	4172745637	,0,	2a3aa68b	16777215	1,18	6000		0		0		k-v	0
29495211		chat.bilibili.com	菲菲很不给爸爸面子 哈哈哈	1518.98400,1,18,16777215,1515658415,0,2a3aa68b,4172742516,4	1515658415	1518.98400	4172742516	,0,	2a3aa68b	16777215	1,18	6000		0		0		k-v	0
29495211		chat.bilibili.com	感觉她比结婚的时候瘦了	1426.32200,1,18,16777215,1515658322,0,2a3aa68b,4172740151,4	1515658322	1426.32200	4172740151	,0,	2a3aa68b	16777215	1,18	6000		0		0		k-v	0
29495211		chat.bilibili.com	世界上人千千万，总有人在过你想要的生活	1402.73100,1,18,16777215,1515658298,0,2a3aa68b,4172739584,4	1515658298	1402.73100	4172739584	,0,	2a3aa68b	16777215	1,18	6000		0		0		k-v	0
29495211		chat.bilibili.com	你要倾听孩子	1353.97200,1,18,16776960,1515658250,0,2a3aa68b,4172738429,4	1515658250	1353.97200	4172738429	,0,	2a3aa68b	16776960	1,18	6000		0		0		k-v	0
29495211		chat.bilibili.com	为了喂奶，她不会断奶除非菲菲不想喝母乳	1238.03300,1,18,0,1515658134,0,2a3aa68b,4172735797,4	1515658134	1238.03300	4172735797	,0,	2a3aa68b	0	1,18	6000		0		0		k-v	0
29495211		chat.bilibili.com	他对艺术很有眼光	1115.73200,1,25,16777215,1515658011,0,2a3aa68b,4172733056,4	1515658011	1115.73200	4172733056	,0,	2a3aa68b	16777215	1,25	6000		0		0		k-v	0
29495211		chat.bilibili.com	狗我都羡慕	225.67400,1,25,16777215,1515656399,0,4ea4856,4172696669,4	1515656399	225.67400	4172696669	,0,	4ea4856	16777215	1,25	6000		0		0		k-v	0
29495211		chat.bilibili.com	侧脸有点像盖尔加朵	1411.61300,1,25,16777215,1515654097,0,d42124f6,4172644202,4	1515654097	1411.61300	4172644202	,0,	d42124f6	16777215	1,25	6000		0		0		k-v	0
29495211		chat.bilibili.com	我很好煮饭	821.20800,4,25,16707842,1515653367,0,ed4b1c9a,4172627160,4	1515653367	821.20800	4172627160	,0,	ed4b1c9a	16707842	4,25	6000		0		0		k-v	0
29495211		chat.bilibili.com	岳父岳母在上，请受小生一拜????????	158.55100,1,25,16777215,1515651938,0,53ad17cc,4172595103,4	1515651938	158.55100	4172595103	,0,	53ad17cc	16777215	1,25	6000		0		0		k-v	0
29495211		chat.bilibili.com	只生一个不存在的	2517.94600,1,25,16777215,1515649356,0,23255fcd,4172533970,4	1515649356	2517.94600	4172533970	,0,	23255fcd	16777215	1,25	6000		0		0		k-v	0
29495211		chat.bilibili.com	丈夫去赚钱	2495.06800,1,25,16777215,1515649445,0,23255fcd,4172532896,4	1515649445	2495.06800	4172532896	,0,	23255fcd	16777215	1,25	6000		0		0		k-v	0
29495211		chat.bilibili.com	有钱人的消磨时光	2491.45200,1,25,16777215,1515649436,0,23255fcd,4172532618,4	1515649436	2491.45200	4172532618	,0,	23255fcd	16777215	1,25	6000		0		0		k-v	0
29495211		chat.bilibili.com	啧啧	2488.32200,1,25,16777215,1515649418,0,23255fcd,4172532092,4	1515649418	2488.32200	4172532092	,0,	23255fcd	16777215	1,25	6000		0		0		k-v	0
29495211		chat.bilibili.com	这么有钱不会减肥吗	1210.16600,1,25,16777215,1515649325,0,23255fcd,4172529408,4	1515649325	1210.16600	4172529408	,0,	23255fcd	16777215	1,25	6000		0		0		k-v	0
29495211		chat.bilibili.com	不减肥吗	1208.62100,1,25,16777215,1515648972,0,23255fcd,4172529112,4	1515648972	1208.62100	4172529112	,0,	23255fcd	16777215	1,25	6000		0		0		k-v	0
29495211		chat.bilibili.com	我家里要是有这么多人我都要烦死了	383.08700,1,25,16777215,1515648587,0,23255fcd,4172510976,4	1515648587	383.08700	4172510976	,0,	23255fcd	16777215	1,25	6000		0		0		k-v	0
29495211		chat.bilibili.com	我受到了惊吓和伤害	75.99600,1,25,16777215,1515648222,0,d1e113a1,4172495883,4	1515648222	75.99600	4172495883	,0,	d1e113a1	16777215	1,25	6000		0		0		k-v	0
29495211		chat.bilibili.com	再见	60.67500,1,25,16777215,1515648224,0,d1e113a1,4172495413,4	1515648224	60.67500	4172495413	,0,	d1e113a1	16777215	1,25	6000		0		0		k-v	0
29495211		chat.bilibili.com	一醒来就是full make up	208.43000,1,25,16777215,1515646730,0,46bd20c4,4172443234,4	1515646730	208.43000	4172443234	,0,	46bd20c4	16777215	1,25	6000		0		0		k-v	0
29495211		chat.bilibili.com	是啊，笑得很假	1744.98200,1,25,16777215,1515642891,0,8b3e57b6,4172320884,4	1515642891	1744.98200	4172320884	,0,	8b3e57b6	16777215	1,25	6000		0		0		k-v	0
29495211		chat.bilibili.com	酸就完事了	588.00000,1,25,16777215,1515641037,0,acd9327e,4172286490,4	1515641037	588.00000	4172286490	,0,	acd9327e	16777215	1,25	6000		0		0		k-v	0
29495211		chat.bilibili.com	别说了我开始羡慕这只狗了	228.57700,1,25,16777215,1515639126,0,3963f9f7,4172239958,4	1515639126	228.57700	4172239958	,0,	3963f9f7	16777215	1,25	6000		0		0		k-v	0
29495211		chat.bilibili.com	说真的就听懂了菲菲	238.49700,1,25,16777215,1515634867,0,1fdfb3b1,4172163424,4	1515634867	238.49700	4172163424	,0,	1fdfb3b1	16777215	1,25	6000		0		0		k-v	0
29495211		chat.bilibili.com	男主眼睛好像郑中基	262.27800,1,25,16777215,1515633163,0,b298906a,4172140328,4	1515633163	262.27800	4172140328	,0,	b298906a	16777215	1,25	6000		0		0		k-v	0
29495211		chat.bilibili.com	俩巨头家族，门当户对呀	864.37900,1,25,16777215,1515631944,0,60026f90,4172126185,4	1515631944	864.37900	4172126185	,0,	60026f90	16777215	1,25	6000		0		0		k-v	0
29495211		chat.bilibili.com	ohmygod	580.40700,1,25,16777215,1515631827,0,c5893102,4172124866,4	1515631827	580.40700	4172124866	,0,	c5893102	16777215	1,25	6000		0		0		k-v	0
29495211		chat.bilibili.com	想知道那些几百年的家族还在不在，那些人是怎么生活的	475.67900,1,25,16777215,1515614215,0,1720be51,4172024455,4	1515614215	475.67900	4172024455	,0,	1720be51	16777215	1,25	6000		0		0		k-v	0
29495211		chat.bilibili.com	英国的	82.66800,1,25,16777215,1515606812,0,ff7031cd,4171949694,4	1515606812	82.66800	4171949694	,0,	ff7031cd	16777215	1,25	6000		0		0		k-v	0
29495211		chat.bilibili.com	刚还为朋友拍衣服，我天，不会，，，	1565.72100,1,25,16777215,1515601383,0,edb268aa,4171807111,4	1515601383	1565.72100	4171807111	,0,	edb268aa	16777215	1,25	6000		0		0		k-v	0
29495211		chat.bilibili.com	后面那个蓝蓝的是冰雪奇缘的宫殿模型	445.70700,4,25,41194,1515601376,0,341b2714,4171806796,4	1515601376	445.70700	4171806796	,0,	341b2714	41194	4,25	6000		0		0		k-v	0
29495211		chat.bilibili.com	谢谢野生字幕！	124.59800,1,25,16777215,1515601353,0,1d72e334,4171805845,4	1515601353	124.59800	4171805845	,0,	1d72e334	16777215	1,25	6000		0		0		k-v	0
29495211		chat.bilibili.com	像高司令	415.95400,1,25,16777215,1515599748,0,f489f074,4171725848,4	1515599748	415.95400	4171725848	,0,	f489f074	16777215	1,25	6000		0		0		k-v	0
29495211		chat.bilibili.com	看眼神真的很相爱啊	1200.77400,1,25,16777215,1515598677,0,e9600791,4171678578,4	1515598677	1200.77400	4171678578	,0,	e9600791	16777215	1,25	6000		0		0		k-v	0
29495211		chat.bilibili.com	要是中国富豪又要吃什么山珍海味，	847.69500,1,25,16777215,1515598076,0,978cdb76,4171652983,4	1515598076	847.69500	4171652983	,0,	978cdb76	16777215	1,25	6000		0		0		k-v	0
29495211		chat.bilibili.com	小孩子通常不喜欢分享	2381.39800,1,25,16777215,1515597427,0,57e9e077,4171624583,4	1515597427	2381.39800	4171624583	,0,	57e9e077	16777215	1,25	6000		0		0		k-v	0
29495211		chat.bilibili.com	是啊，妆	106.58100,1,25,16777215,1515596901,0,978cdb76,4171616260,4	1515596901	106.58100	4171616260	,0,	978cdb76	16777215	1,25	6000		0		0		k-v	0
29495211		chat.bilibili.com	感觉管家和仆人更像是提供酒店式服务和个人商务及生活助理。	840.70200,1,25,16777215,1515595884,0,b25feee2,4171570320,4	1515595884	840.70200	4171570320	,0,	b25feee2	16777215	1,25	6000		0		0		k-v	0
29495211		chat.bilibili.com	菲菲让我想起了花少里的那个狗狗	706.14400,1,25,16777215,1515596000,0,aa2d1578,4171559917,4	1515596000	706.14400	4171559917	,0,	aa2d1578	16777215	1,25	6000		0		0		k-v	0
29495211		chat.bilibili.com	老师来布置作业了	323.98700,1,25,16777215,1515595779,0,4fe35eec,4171555564,4	1515595779	323.98700	4171555564	,0,	4fe35eec	16777215	1,25	6000		0		0		k-v	0
29495211		chat.bilibili.com	what does bossy mean 前面的，，	874.18500,1,25,15138834,1515595771,0,a077d316,4171549325,4	1515595771	874.18500	4171549325	,0,	a077d316	15138834	1,25	6000		0		0		k-v	0
29495211		chat.bilibili.com	说了之前会下厨给J做饭，只是现在不常做了	818.53200,1,25,16777215,1515594479,0,16f5cb8e,4171489025,4	1515594479	818.53200	4171489025	,0,	16f5cb8e	16777215	1,25	6000		0		0		k-v	0
29495211		chat.bilibili.com	天哪............	589.25200,1,25,16777215,1515594282,0,15e932f8,4171479840,4	1515594282	589.25200	4171479840	,0,	15e932f8	16777215	1,25	6000		0		0		k-v	0
29495211		chat.bilibili.com	女主人有点像破产姐妹的苏菲～瘦版的哈哈哈	260.45900,1,25,16777215,1515591502,0,2ad16d6c,4171350110,4	1515591502	260.45900	4171350110	,0,	2ad16d6c	16777215	1,25	6000		0		0		k-v	0
29495211		chat.bilibili.com	love runs out	0.45700,1,25,16777215,1515590719,0,b7130d34,4171315492,4	1515590719	0.45700	4171315492	,0,	b7130d34	16777215	1,25	6000		0		0		k-v	0
29495211		chat.bilibili.com	balbalabala	883.74100,1,25,16777215,1515590558,0,5dd44e64,4171308209,4	1515590558	883.74100	4171308209	,0,	5dd44e64	16777215	1,25	6000		0		0		k-v	0
29495211		chat.bilibili.com	what is bossy means	871.15600,1,25,16777215,1515590205,0,5dd44e64,4171307613,4	1515590205	871.15600	4171307613	,0,	5dd44e64	16777215	1,25	6000		0		0		k-v	0
29495211		chat.bilibili.com	感受一下有钱人的生活	70.10700,1,25,16777215,1515590477,0,c732b20,4171305333,4	1515590477	70.10700	4171305333	,0,	c732b20	16777215	1,25	6000		0		0		k-v	0
29495211		chat.bilibili.com	1	818.58800,1,25,16777215,1515590368,0,5dd44e64,4171305254,4	1515590368	818.58800	4171305254	,0,	5dd44e64	16777215	1,25	6000		0		0		k-v	0
29495211		chat.bilibili.com	爱笑的女孩钱都不会太少...	796.83800,1,25,16777215,1515590346,0,5dd44e64,4171304394,4	1515590346	796.83800	4171304394	,0,	5dd44e64	16777215	1,25	6000		0		0		k-v	0
29495211		chat.bilibili.com	a dozen？？	2678.26500,1,25,16777215,1515590419,0,569a0ec7,4171302229,4	1515590419	2678.26500	4171302229	,0,	569a0ec7	16777215	1,25	6000		0		0		k-v	0
29495211		chat.bilibili.com	菲菲第N次	700.43200,1,25,16777215,1515590375,0,5dd44e64,4171300315,3	1515590375	700.43200	4171300315	,0,	5dd44e64	16777215	1,25	6000		0		0		k-v	0
29495211		chat.bilibili.com	名媛清流	1636.06000,1,25,16777215,1515590327,0,84df0af,4171298999,3	1515590327	1636.06000	4171298999	,0,	84df0af	16777215	1,25	6000		0		0		k-v	0
29495211		chat.bilibili.com	她真的很开朗自然唉	1632.24100,1,25,16777215,1515590332,0,84df0af,4171298476,3	1515590332	1632.24100	4171298476	,0,	84df0af	16777215	1,25	6000		0		0		k-v	0
29495211		chat.bilibili.com	菲菲关注点很高呀	478.54000,1,25,16777215,1515590127,0,5dd44e64,4171295117,3	1515590127	478.54000	4171295117	,0,	5dd44e64	16777215	1,25	6000		0		0		k-v	0
29495211		chat.bilibili.com	行程都准备好	465.61900,1,25,16777215,1515590240,0,5dd44e64,4171294533,3	1515590240	465.61900	4171294533	,0,	5dd44e64	16777215	1,25	6000		0		0		k-v	0
29495211		chat.bilibili.com	光速打脸前面说没互动的	2460.44500,1,25,16777215,1515589837,0,569a0ec7,4171291838,3	1515589837	2460.44500	4171291838	,0,	569a0ec7	16777215	1,25	6000		0		0		k-v	0
29495211		chat.bilibili.com	解决了就业	377.82600,1,25,16777215,1515590027,0,5dd44e64,4171290722,3	1515590027	377.82600	4171290722	,0,	5dd44e64	16777215	1,25	6000		0		0		k-v	0
29495211		chat.bilibili.com	女主妈妈妹妹都是美女	710.99900,1,25,16777215,1515589741,0,a1d00fe8,4171273320,3	1515589741	710.99900	4171273320	,0,	a1d00fe8	16777215	1,25	6000		0		0		k-v	0
29495211		chat.bilibili.com	花钱雇真人	2285.54000,1,25,16777215,1515589348,0,f1c1ea94,4171271068,3	1515589348	2285.54000	4171271068	,0,	f1c1ea94	16777215	1,25	6000		0		0		k-v	0
29495211		chat.bilibili.com	刚出生就是迪拜全球随便飞	623.51200,1,25,16777215,1515589612,0,a1d00fe8,4171267648,3	1515589612	623.51200	4171267648	,0,	a1d00fe8	16777215	1,25	6000		0		0		k-v	0
29495211		chat.bilibili.com	小女孩生日迪斯尼的米奇米妮都请来了	611.63300,1,25,16777215,1515589580,0,a1d00fe8,4171266350,3	1515589580	611.63300	4171266350	,0,	a1d00fe8	16777215	1,25	6000		0		0		k-v	0
29495211		chat.bilibili.com	关注他们ins你就闭嘴说假了	608.94300,1,25,16777215,1515589539,0,a1d00fe8,4171265339,3	1515589539	608.94300	4171265339	,0,	a1d00fe8	16777215	1,25	6000		0		0		k-v	0
29495211		chat.bilibili.com	真的觉得男的不太对……感觉不投入	1445.60700,1,25,16777215,1515589207,0,7c3f2d19,4171264957,3	1515589207	1445.60700	4171264957	,0,	7c3f2d19	16777215	1,25	6000		0		0		k-v	0
29495211		chat.bilibili.com	野生字幕君呢？	1238.15800,1,25,16777215,1515588775,0,172f5e73,4171231822,3	1515588775	1238.15800	4171231822	,0,	172f5e73	16777215	1,25	6000		0		0		k-v	0
29495211		chat.bilibili.com	Rita的新歌!	1640.90200,1,25,16777215,1515588666,0,9b1dc02c,4171227193,3	1515588666	1640.90200	4171227193	,0,	9b1dc02c	16777215	1,25	6000		0		0		k-v	0
29495211		chat.bilibili.com	bgm: symphony	252.68200,1,25,16777215,1515587056,0,9b1dc02c,4171160677,3	1515587056	252.68200	4171160677	,0,	9b1dc02c	16777215	1,25	6000		0		0		k-v	0
29495211		chat.bilibili.com	黄老板的歌!	68.11800,1,25,16777215,1515586863,0,9b1dc02c,4171152351,3	1515586863	68.11800	4171152351	,0,	9b1dc02c	16777215	1,25	6000		0		0		k-v	0
29495211		chat.bilibili.com	爸爸真的超级帅	2628.76000,1,25,16777215,1515585314,0,9851d262,4171090274,3	1515585314	2628.76000	4171090274	,0,	9851d262	16777215	1,25	6000		0		0		k-v	0
29495211		chat.bilibili.com	女主人是不是不用工作	322.84700,1,25,16777215,1515583348,0,5340bf2f,4171012669,3	1515583348	322.84700	4171012669	,0,	5340bf2f	16777215	1,25	6000		0		0		k-v	0
29495211		chat.bilibili.com	妈妈真的很棒 单凭她如此希望自己的孩子开心 并且亲力亲为	668.89700,1,25,16777215,1515582129,0,8f51b21c,4170971791,3	1515582129	668.89700	4170971791	,0,	8f51b21c	16777215	1,25	6000		0		0		k-v	0
29495211		chat.bilibili.com	娱乐房对菲菲大概就像俱乐部脱衣女郎对男人，很有吸引力	639.68100,4,25,16777215,1515582318,0,2d10b3e9,4170970727,3	1515582318	639.68100	4170970727	,0,	2d10b3e9	16777215	4,25	6000		0		0		k-v	0		有标点符号
29495211		chat.bilibili.com	还想要什么	141.88700,1,25,16777215,1515582387,0,5340bf2f,4170968567,3	1515582387	141.88700	4170968567	,0,	5340bf2f	16777215	1,25	6000		0		0		k-v	0
29495211		chat.bilibili.com	我一直试图不要太宠女儿，但有时很难控制自己	604.16200,4,25,16777215,1515582344,1,2d10b3e9,4170967618,3	1515582344	604.16200	4170967618	,1,	2d10b3e9	16777215	4,25	6000		0		0		k-v	0		有标点符号
29495211		chat.bilibili.com	我一直想要这样的玩具	595.52100,4,25,16777215,1515582324,1,2d10b3e9,4170966143,3	1515582324	595.52100	4170966143	,1,	2d10b3e9	16777215	4,25	6000		0		0		k-v	0
29495211		chat.bilibili.com	我们把不常用的泳池房改造成了菲菲一定会喜欢的娱乐房（惊喜）	560.28200,4,25,16777215,1515582272,1,2d10b3e9,4170964055,3	1515582272	560.28200	4170964055	,1,	2d10b3e9	16777215	4,25	6000		0		0		k-v	0		用括号解释
29495211		chat.bilibili.com	我可以去刷厕所	89.18800,1,25,16777215,1515582270,0,5340bf2f,4170963956,3	1515582270	89.18800	4170963956	,0,	5340bf2f	16777215	1,25	6000		0		0		k-v	0
29495211		chat.bilibili.com	看人家的管家✺◟(∗❛ัᴗ❛ั∗)◞✺	83.24800,1,25,16777215,1515582228,0,5340bf2f,4170962968,3	1515582228	83.24800	4170962968	,0,	5340bf2f	16777215	1,25	6000		0		0		k-v	0
29495211		chat.bilibili.com	你觉得惊喜是什么？你期待吗？	545.30000,4,25,16777215,1515582179,1,2d10b3e9,4170960349,3	1515582179	545.30000	4170960349	,1,	2d10b3e9	16777215	4,25	6000		0		0		k-v	0		有标点符号
29495211		chat.bilibili.com	我们喜欢把一天安排的满满的，有意思的活动很多	539.52100,4,25,16777215,1515582148,1,2d10b3e9,4170959100,3	1515582148	539.52100	4170959100	,1,	2d10b3e9	16777215	4,25	6000		0		0		k-v	0		有标点符号
29495211		chat.bilibili.com	她做她喜欢的事时我也很开心	530.76000,4,25,16777215,1515582090,1,2d10b3e9,4170957606,3	1515582090	530.76000	4170957606	,1,	2d10b3e9	16777215	4,25	6000		0		0		k-v	0
29495211		chat.bilibili.com	我只想让三岁的女儿过得开心	512.47900,4,25,16777215,1515582068,1,2d10b3e9,4170956093,3	1515582068	512.47900	4170956093	,1,	2d10b3e9	16777215	4,25	6000		0		0		k-v	0
29495211		chat.bilibili.com	这个是不是闪烁啊！	1674.07800,1,25,16777215,1515582055,0,770b7049,4170955548,3	1515582055	1674.07800	4170955548	,0,	770b7049	16777215	1,25	6000		0		0		k-v	0
29495211		chat.bilibili.com	我没有专门雇人照顾菲菲，都是自己亲自陪伴和照顾	475.44000,1,25,16777215,1515581672,1,2d10b3e9,4170953995,3	1515581672	475.44000	4170953995	,1,	2d10b3e9	16777215	1,25	6000		0		0		k-v	0		有标点符号
29495211		chat.bilibili.com	我们的婚礼举行了三天	268.81300,4,25,16777215,1515581760,1,2d10b3e9,4170944863,3	1515581760	268.81300	4170944863	,1,	2d10b3e9	16777215	4,25	6000		0		0		k-v	0
29495211		chat.bilibili.com	杰为菲菲准备了惊喜	207.43200,1,25,16777215,1515581697,1,2d10b3e9,4170941762,3	1515581697	207.43200	4170941762	,1,	2d10b3e9	16777215	1,25	6000		0		0		k-v	0
29495211		chat.bilibili.com	伯尼	289.22700,1,25,16777215,1515581039,0,6f2d8121,4170916861,3	1515581039	289.22700	4170916861	,0,	6f2d8121	16777215	1,25	6000		0		0		k-v	0
29495211		chat.bilibili.com	感觉妈妈在享受生日	2319.32700,1,25,16777215,1515580443,0,a1eb741f,4170894546,3	1515580443	2319.32700	4170894546	,0,	a1eb741f	16777215	1,25	6000		0		0		k-v	0
29495211		chat.bilibili.com	就不能想点别人好吗，人家挺幸福啊	560.28700,1,25,16777215,1515576893,0,38d9fe69,4170775593,3	1515576893	560.28700	4170775593	,0,	38d9fe69	16777215	1,25	6000		0		0		k-v	0
29495211		chat.bilibili.com	原来这就是有钱人的生活啊~	2126.50400,1,25,16777215,1515575426,0,7a4f682,4170736117,3	1515575426	2126.50400	4170736117	,0,	7a4f682	16777215	1,25	6000		0		0		k-v	0
29495211		chat.bilibili.com	我又开始羡慕这条狗了	227.46300,1,25,16777215,1515572704,0,8fb798e,4170668960,3	1515572704	227.46300	4170668960	,0,	8fb798e	16777215	1,25	6000		0		0		k-v	0
29495211		chat.bilibili.com	人家是有钱人又不是废人好伐	809.03000,1,25,16777215,1515572461,0,5bc6e892,4170668278,3	1515572461	809.03000	4170668278	,0,	5bc6e892	16777215	1,25	6000		0		0		k-v	0
29495211		chat.bilibili.com	我羡慕这孩子	167.04300,1,25,16777215,1515572759,0,8fb798e,4170667267,3	1515572759	167.04300	4170667267	,0,	8fb798e	16777215	1,25	6000		0		0		k-v	0
29495211		chat.bilibili.com	我来看一下有钱人的生活，为做梦提供素材	54.90200,1,25,16777215,1515572638,0,8fb798e,4170664457,3	1515572638	54.90200	4170664457	,0,	8fb798e	16777215	1,25	6000		0		0		k-v	0
29495211		chat.bilibili.com	总觉得家里很多人来回走会让我没安全感……贫穷限制了我的安全感	381.89800,1,25,16777215,1515572362,0,5bc6e892,4170658043,3	1515572362	381.89800	4170658043	,0,	5bc6e892	16777215	1,25	6000		0		0		k-v	0
29495211		chat.bilibili.com	项链海洋奇缘的啊	515.20300,1,25,16777215,1515571101,0,e1f4c61d,4170628005,3	1515571101	515.20300	4170628005	,0,	e1f4c61d	16777215	1,25	6000		0		0		k-v	0
29495211		chat.bilibili.com	缺员工吗	83.33600,1,25,16777215,1515570513,0,e1f4c61d,4170615005,3	1515570513	83.33600	4170615005	,0,	e1f4c61d	16777215	1,25	6000		0		0		k-v	0
29495211		chat.bilibili.com	桌上的凡士林同款？？？我竟然有亿万富豪同款	1323.90900,1,25,16777215,1515569786,0,430b6345,4170600878,3	1515569786	1323.90900	4170600878	,0,	430b6345	16777215	1,25	6000		0		0		k-v	0
29495211		chat.bilibili.com	花钱雇的朋友哈哈哈哈厉害啦	2278.79500,1,25,16777215,1515569418,0,f9e33c5c,4170592565,3	1515569418	2278.79500	4170592565	,0,	f9e33c5c	16777215	1,25	6000		0		0		k-v	0
29495211		chat.bilibili.com	……	1056.93100,1,25,16777215,1515568726,0,1e85bf33,4170574238,3	1515568726	1056.93100	4170574238	,0,	1e85bf33	16777215	1,25	6000		0		0		k-v	0
29495211		chat.bilibili.com	妈耶(。_。)…………我tm哭啊啊	588.90300,1,25,16777215,1515568257,0,1e85bf33,4170563643,3	1515568257	588.90300	4170563643	,0,	1e85bf33	16777215	1,25	6000		0		0		k-v	0
29495211		chat.bilibili.com	啧……多世无忧啊	372.56300,1,25,16777215,1515567884,0,1e85bf33,4170558032,3	1515567884	372.56300	4170558032	,0,	1e85bf33	16777215	1,25	6000		0		0		k-v	0
29495211		chat.bilibili.com	马杀鸡～	342.76000,1,25,16777215,1515567837,0,1e85bf33,4170557020,3	1515567837	342.76000	4170557020	,0,	1e85bf33	16777215	1,25	6000		0		0		k-v	0
29495211		chat.bilibili.com	觉得她挺有教养的	443.14100,1,25,16777215,1515567775,0,25b080b7,4170552822,3	1515567775	443.14100	4170552822	,0,	25b080b7	16777215	1,25	6000		0		0		k-v	0
29495211		chat.bilibili.com	人跟人差的真多	429.62600,1,25,16777215,1515567762,0,25b080b7,4170552486,3	1515567762	429.62600	4170552486	,0,	25b080b7	16777215	1,25	6000		0		0		k-v	0
29495211		chat.bilibili.com	还是喜欢有钱又随心的人生	373.38700,1,25,16777215,1515567706,0,25b080b7,4170551180,3	1515567706	373.38700	4170551180	,0,	25b080b7	16777215	1,25	6000		0		0		k-v	0
29495211		chat.bilibili.com	世界上原来真的有完美人生	310.09100,1,25,16777215,1515567642,0,25b080b7,4170549719,3	1515567642	310.09100	4170549719	,0,	25b080b7	16777215	1,25	6000		0		0		k-v	0
29495211		chat.bilibili.com	只听得懂 菲菲	232.16400,1,25,16777215,1515567566,0,25b080b7,4170547923,3	1515567566	232.16400	4170547923	,0,	25b080b7	16777215	1,25	6000		0		0		k-v	0
29495211		chat.bilibili.com	一早就化好妆了	152.01900,1,25,16777215,1515566938,0,62fc3d71,4170533347,3	1515566938	152.01900	4170533347	,0,	62fc3d71	16777215	1,25	6000		0		0		k-v	0
29495211		chat.bilibili.com	真的好妈妈啊	1909.08700,1,25,16777215,1515564548,0,765e0269,4170486330,3	1515564548	1909.08700	4170486330	,0,	765e0269	16777215	1,25	6000		0		0		k-v	0
29495211		chat.bilibili.com	夫妻俩那会儿女的穿着睡衣说自己生活习惯的时候气氛很好	1436.14900,1,25,16777215,1515564402,0,765e0269,4170474283,3	1515564402	1436.14900	4170474283	,0,	765e0269	16777215	1,25	6000		0		0		k-v	0
29495211		chat.bilibili.com	求字幕	201.78100,1,25,16777215,1515558705,0,21b9f41a,4170307441,3	1515558705	201.78100	4170307441	,0,	21b9f41a	16777215	1,25	6000		0		0		k-v	0
29495211		chat.bilibili.com	女主人很陽光的感覺	1504.24800,1,25,16777215,1515558793,0,287cf7af,4170303193,3	1515558793	1504.24800	4170303193	,0,	287cf7af	16777215	1,25	6000		0		0		k-v	0
29495211		chat.bilibili.com	火星预警！！	1510.04700,1,25,16777215,1515558870,0,e87d29a8,4170301572,3	1515558870	1510.04700	4170301572	,0,	e87d29a8	16777215	1,25	6000		0		0		k-v	0
29495211		chat.bilibili.com	有钱人生活真好	55.54200,1,25,16777215,1515558840,0,96ce6971,4170300631,3	1515558840	55.54200	4170300631	,0,	96ce6971	16777215	1,25	6000		0		0		k-v	0
29495211		chat.bilibili.com	我也想要	995.62400,1,25,16777215,1515556018,0,873e542,4170232456,3	1515556018	995.62400	4170232456	,0,	873e542	16777215	1,25	6000		0		0		k-v	0
29495211		chat.bilibili.com	承包狗子！！！	2439.41500,5,25,11890,1515553530,0,ed3a6544,4170174718,3	1515553530	2439.41500	4170174718	,0,	ed3a6544	11890	5,25	6000		0		0		k-v	0
29495211		chat.bilibili.com	她的小伙伴一样有钱啊...所以每人家里都有这样的乐园	616.71300,1,25,16777215,1515551948,0,b19ab49e,4170144691,3	1515551948	616.71300	4170144691	,0,	b19ab49e	16777215	1,25	6000		0		0		k-v	0
29495211		chat.bilibili.com	我正在试图用我的鸡肉	1014.91900,1,25,16777215,1515550021,0,2879eba2,4170116852,3	1515550021	1014.91900	4170116852	,0,	2879eba2	16777215	1,25	6000		0		0		k-v	0		错字
29495211		chat.bilibili.com	用上你的肌肉	1014.91900,1,25,16777215,1515550341,0,2879eba2,4170116528,3	1515550341	1014.91900	4170116528	,0,	2879eba2	16777215	1,25	6000		0		0		k-v	0
29495211		chat.bilibili.com	还有我	1014.91900,1,25,16777215,1515550313,0,2879eba2,4170116053,3	1515550313	1014.91900	4170116053	,0,	2879eba2	16777215	1,25	6000		0		0		k-v	0
29495211		chat.bilibili.com	这手法一看就很娴熟 不像做样子啊	803.46100,1,25,16777215,1515550010,0,11e1448,4170111395,3	1515550010	803.46100	4170111395	,0,	11e1448	16777215	1,25	6000		0		0		k-v	0
29495211		chat.bilibili.com	这是你最爱的地方吗	617.28000,1,25,16777215,1515549832,0,2879eba2,4170108068,3	1515549832	617.28000	4170108068	,0,	2879eba2	16777215	1,25	6000		0		0		k-v	0
29495211		chat.bilibili.com	你觉得接下来会有什么惊喜	543.55400,1,25,16777215,1515549460,0,2879eba2,4170102026,3	1515549460	543.55400	4170102026	,0,	2879eba2	16777215	1,25	6000		0		0		k-v	0
29495211		chat.bilibili.com	我会很开心，当她做她喜欢做的事	529.97000,1,25,16777215,1515548561,0,2879eba2,4170090490,3	1515548561	529.97000	4170090490	,0,	2879eba2	16777215	1,25	6000		0		0		k-v	0		有标点符号
29495211		chat.bilibili.com	这个亚裔全程假笑	1741.38300,1,25,41194,1515547974,0,12e53211,4170080582,3	1515547974	1741.38300	4170080582	,0,	12e53211	41194	1,25	6000		0		0		k-v	0
29495211		chat.bilibili.com	头以下都好膨胀	1654.65600,1,25,41194,1515547725,0,12e53211,4170077185,3	1515547725	1654.65600	4170077185	,0,	12e53211	41194	1,25	6000		0		0		k-v	0
29495211		chat.bilibili.com	她怎么不减肥啊 这样看一起再瘦点就好看了	1629.76500,1,25,16707842,1515547651,0,12e53211,4170076209,3	1515547651	1629.76500	4170076209	,0,	12e53211	16707842	1,25	6000		0		0		k-v	0
29495211		chat.bilibili.com	一件普普通通衣服都是上万 衣柜堆了多少钱	1055.41700,1,25,16707842,1515547042,0,12e53211,4170068495,3	1515547042	1055.41700	4170068495	,0,	12e53211	16707842	1,25	6000		0		0		k-v	0
29495211		chat.bilibili.com	天啦 那个兔子好舒服 还贵 哎	945.37700,1,25,16707842,1515546896,0,12e53211,4170066477,3	1515546896	945.37700	4170066477	,0,	12e53211	16707842	1,25	6000		0		0		k-v	0
29495211		chat.bilibili.com	虽然没有高斯林帅勉强啦哈哈 总之有钱啊	897.08000,1,25,16707842,1515546802,0,12e53211,4170065594,3	1515546802	897.08000	4170065594	,0,	12e53211	16707842	1,25	6000		0		0		k-v	0
29495211		chat.bilibili.com	话说小孩子长得真好看	419.90900,1,25,16707842,1515546249,0,12e53211,4170057863,3	1515546249	419.90900	4170057863	,0,	12e53211	16707842	1,25	6000		0		0		k-v	0
29495211		chat.bilibili.com	对对对	362.44000,1,25,16707842,1515546099,0,12e53211,4170056196,3	1515546099	362.44000	4170056196	,0,	12e53211	16707842	1,25	6000		0		0		k-v	0
29495211		chat.bilibili.com	。	332.37000,1,25,16707842,1515546008,0,12e53211,4170055449,3	1515546008	332.37000	4170055449	,0,	12e53211	16707842	1,25	6000		0		0		k-v	0
29495211		chat.bilibili.com	弹幕渐渐没有了	203.17400,1,25,16707842,1515545552,0,12e53211,4170053976,3	1515545552	203.17400	4170053976	,0,	12e53211	16707842	1,25	6000		0		0		k-v	0
29495211		chat.bilibili.com	于晓光那个真的笑死	186.17700,1,25,16707842,1515545855,0,12e53211,4170053579,3	1515545855	186.17700	4170053579	,0,	12e53211	16707842	1,25	6000		0		0		k-v	0
29495211		chat.bilibili.com	我要重新投胎哈哈哈	172.33800,1,25,16707842,1515545828,0,12e53211,4170053288,3	1515545828	172.33800	4170053288	,0,	12e53211	16707842	1,25	6000		0		0		k-v	0
29495211		chat.bilibili.com	女孩子跟爸爸的感觉有点淡淡的	2619.98900,1,25,16777215,1515544869,0,d38496e2,4170043528,3	1515544869	2619.98900	4170043528	,0,	d38496e2	16777215	1,25	6000		0		0		k-v	0
29495211		chat.bilibili.com	这个额头.......	157.33800,1,25,16777215,1515542239,0,28d9436,4170020734,3	1515542239	157.33800	4170020734	,0,	28d9436	16777215	1,25	6000		0		0		k-v	0
29495211		chat.bilibili.com	前面的电视剧看看就行了吧	125.20700,1,25,16777215,1515541856,0,28d9436,4170020414,3	1515541856	125.20700	4170020414	,0,	28d9436	16777215	1,25	6000		0		0		k-v	0
29495211		chat.bilibili.com	假	104.95400,1,25,16777215,1515542035,0,28d9436,4170020181,3	1515542035	104.95400	4170020181	,0,	28d9436	16777215	1,25	6000		0		0		k-v	0
29495211		chat.bilibili.com	？？？？？我。。。	588.37000,1,25,16777215,1515538343,0,3c94d27d,4169999582,3	1515538343	588.37000	4169999582	,0,	3c94d27d	16777215	1,25	6000		0		0		k-v	0
29495211		chat.bilibili.com	啊，原来是f1老板的女儿，那真的有钱成什么样都不奇怪了	290.94500,1,25,16777215,1515523057,0,99938472,4169918381,3	1515523057	290.94500	4169918381	,0,	99938472	16777215	1,25	6000		0		0		k-v	0
29495211		chat.bilibili.com	另外个女孩子真是好看。。。	2399.66200,1,25,16777215,1515522326,0,d073dfd8,4169907823,3	1515522326	2399.66200	4169907823	,0,	d073dfd8	16777215	1,25	6000		0		0		k-v	0
29495211		chat.bilibili.com	你完全想象不到有些用品衣服多少钱	1049.87700,1,25,16777215,1515515329,0,20e3c149,4169761306,3	1515515329	1049.87700	4169761306	,0,	20e3c149	16777215	1,25	6000		0		0		k-v	0
29495211		chat.bilibili.com	这个肉，哭泣	791.50900,1,25,16777215,1515515051,0,20e3c149,4169752251,3	1515515051	791.50900	4169752251	,0,	20e3c149	16777215	1,25	6000		0		0		k-v	0
29495211		chat.bilibili.com	是好妈妈好爸爸但是夫妻有点emmm	574.06600,1,25,16777215,1515512836,0,5499bb58,4169665584,3	1515512836	574.06600	4169665584	,0,	5499bb58	16777215	1,25	6000		0		0		k-v	0
29495211		chat.bilibili.com	对	564.19300,1,25,16777215,1515512459,0,dc4c4cc2,4169648689,3	1515512459	564.19300	4169648689	,0,	dc4c4cc2	16777215	1,25	6000		0		0		k-v	0
29495211		chat.bilibili.com	眼睛那么小 脸型也不行…	421.96200,1,25,16777215,1515512317,0,dc4c4cc2,4169641889,3	1515512317	421.96200	4169641889	,0,	dc4c4cc2	16777215	1,25	6000		0		0		k-v	0
29495211		chat.bilibili.com	不帅啊	406.93600,1,25,16777215,1515512320,0,dc4c4cc2,4169641133,3	1515512320	406.93600	4169641133	,0,	dc4c4cc2	16777215	1,25	6000		0		0		k-v	0
29495211		chat.bilibili.com	应该是自娱自乐拍不是专业拍	2408.09900,1,25,16777215,1515509576,0,94db02e4,4169480651,3	1515509576	2408.09900	4169480651	,0,	94db02e4	16777215	1,25	6000		0		0		k-v	0
29495211		chat.bilibili.com	几栋房子没了	2166.65300,1,25,16777215,1515509057,0,94db02e4,4169471261,3	1515509057	2166.65300	4169471261	,0,	94db02e4	16777215	1,25	6000		0		0		k-v	0
29495211		chat.bilibili.com	为了拍节目才化妆的吧…	113.68400,1,25,16777215,1515509314,0,5bcfca6d,4169467113,3	1515509314	113.68400	4169467113	,0,	5bcfca6d	16777215	1,25	6000		0		0		k-v	0
29495211		chat.bilibili.com	几位阔太太虚伪的坐着聊什么呢？	1621.69000,1,25,16777215,1515509020,0,94db02e4,4169454290,3	1515509020	1621.69000	4169454290	,0,	94db02e4	16777215	1,25	6000		0		0		k-v	0
29495211		chat.bilibili.com	打劫，把兔子交出来	950.18600,1,25,16777215,1515508146,0,94db02e4,4169411439,3	1515508146	950.18600	4169411439	,0,	94db02e4	16777215	1,25	6000		0		0		k-v	0
29495211		chat.bilibili.com	认出了背景里的定制木马。。就那一个木马我这辈子都买不起啊。。。	420.71700,1,25,16777215,1515507688,0,90d2c186,4169405758,3	1515507688	420.71700	4169405758	,0,	90d2c186	16777215	1,25	6000		0		0		k-v	0
29495211		chat.bilibili.com	不常下厨，拍摄没办法表现一下	797.10700,1,25,16777215,1515507956,0,94db02e4,4169402245,3	1515507956	797.10700	4169402245	,0,	94db02e4	16777215	1,25	6000		0		0		k-v	0
29495211		chat.bilibili.com	嫉妒使我面目全非	729.32800,1,25,16777215,1515507894,0,849bd8ba,4169399212,3	1515507894	729.32800	4169399212	,0,	849bd8ba	16777215	1,25	6000		0		0		k-v	0
29495211		chat.bilibili.com	偷吃	741.15200,1,25,16777215,1515507846,0,94db02e4,4169396878,3	1515507846	741.15200	4169396878	,0,	94db02e4	16777215	1,25	6000		0		0		k-v	0
29495211		chat.bilibili.com	想打死上帝，为什么	581.94000,1,25,16777215,1515507682,0,94db02e4,4169388973,3	1515507682	581.94000	4169388973	,0,	94db02e4	16777215	1,25	6000		0		0		k-v	0
29495211		chat.bilibili.com	每天做选择题，累不累啊	356.63700,1,25,16777215,1515507437,0,94db02e4,4169377179,3	1515507437	356.63700	4169377179	,0,	94db02e4	16777215	1,25	6000		0		0		k-v	0
29495211		chat.bilibili.com	我有fefe，她是个早起的孩子	745.34700,5,25,16750899,1515507211,0,a8ba619,4169366226,3	1515507211	745.34700	4169366226	,0,	a8ba619	16750899	5,25	6000		0		0		k-v	0
29495211		chat.bilibili.com	女主人不太自在	139.78200,1,25,16777215,1515507199,0,94db02e4,4169365632,3	1515507199	139.78200	4169365632	,0,	94db02e4	16777215	1,25	6000		0		0		k-v	0
29495211		chat.bilibili.com	除了他我好像根本不知道谁不喜欢纸杯蛋糕	726.02500,5,25,16750899,1515507167,0,a8ba619,4169364136,3	1515507167	726.02500	4169364136	,0,	a8ba619	16750899	5,25	6000		0		0		k-v	0
29495211		chat.bilibili.com	不喜欢吃纸杯蛋糕的人真是太奇怪了	720.99200,5,25,16750899,1515507134,0,a8ba619,4169362555,3	1515507134	720.99200	4169362555	,0,	a8ba619	16750899	5,25	6000		0		0		k-v	0
29495211		chat.bilibili.com	36亿	69.82400,1,25,16777215,1515507107,0,94db02e4,4169361221,3	1515507107	69.82400	4169361221	,0,	94db02e4	16777215	1,25	6000		0		0		k-v	0
29495211		chat.bilibili.com	在中国算胖的	25.96100,1,25,16777215,1515507015,0,94db02e4,4169356715,3	1515507015	25.96100	4169356715	,0,	94db02e4	16777215	1,25	6000		0		0		k-v	0
29495211		chat.bilibili.com	所以说贫穷限制了你的想象力	2432.01500,1,25,16777215,1515506940,0,a3ab2130,4169353024,3	1515506940	2432.01500	4169353024	,0,	a3ab2130	16777215	1,25	6000		0		0		k-v	0
29495211		chat.bilibili.com	宝宝很可爱	914.50700,1,25,16777215,1515506550,0,fa7e3f59,4169335183,3	1515506550	914.50700	4169335183	,0,	fa7e3f59	16777215	1,25	6000		0		0		k-v	0
29495211		chat.bilibili.com	应该多生几个	179.73200,1,25,16777215,1515506414,0,2055ca94,4169327800,3	1515506414	179.73200	4169327800	,0,	2055ca94	16777215	1,25	6000		0		0		k-v	0
29495211		chat.bilibili.com	她是个好妈妈	555.34100,1,25,16777215,1515506208,0,fa7e3f59,4169317943,3	1515506208	555.34100	4169317943	,0,	fa7e3f59	16777215	1,25	6000		0		0		k-v	0
29495211		chat.bilibili.com	还没周星驰叼	113.72100,1,25,16777215,1515505448,0,3385cc40,4169298147,3	1515505448	113.72100	4169298147	,0,	3385cc40	16777215	1,25	6000		0		0		k-v	0
29495211		chat.bilibili.com	我们非常热爱我们的家庭	670.15700,5,25,16750899,1515505676,0,a8ba619,4169292960,3	1515505676	670.15700	4169292960	,0,	a8ba619	16750899	5,25	6000		0		0		k-v	0
29495211		chat.bilibili.com	贫穷限制了我的想象	571.34600,1,25,16777215,1515504595,0,4f5f49f9,4169242962,3	1515504595	571.34600	4169242962	,0,	4f5f49f9	16777215	1,25	6000		0		0		k-v	0
29495211		chat.bilibili.com	但我想我有时候确实有些溺爱她	604.81500,4,25,16777215,1515504339,0,a8ba619,4169231214,3	1515504339	604.81500	4169231214	,0,	a8ba619	16777215	4,25	6000		0		0		k-v	0
29495211		chat.bilibili.com	我试着不去溺爱fefe	598.91100,4,25,16777215,1515504305,0,a8ba619,4169229674,3	1515504305	598.91100	4169229674	,0,	a8ba619	16777215	4,25	6000		0		0		k-v	0
29495211		chat.bilibili.com	每天都没有固定的日常 我和fefe都非常忙	536.93800,4,25,16777215,1515503943,0,a8ba619,4169213063,3	1515503943	536.93800	4169213063	,0,	a8ba619	16777215	4,25	6000		0		0		k-v	0
29495211		chat.bilibili.com	我是来看房子和装饰的……	211.27500,1,25,16777215,1515501704,0,ccced282,4169130229,3	1515501704	211.27500	4169130229	,0,	ccced282	16777215	1,25	6000		0		0		k-v	0
29495211		chat.bilibili.com	突然发现同款凡士林	1327.01100,1,25,16777215,1515501543,0,2372505d,4169123271,3	1515501543	1327.01100	4169123271	,0,	2372505d	16777215	1,25	6000		0		0		k-v	0
29495211		chat.bilibili.com	眼睛是不会骗人的	591.99000,1,25,16777215,1515501870,0,9d958096,4169122768,3	1515501870	591.99000	4169122768	,0,	9d958096	16777215	1,25	6000		0		0		k-v	0
29495211		chat.bilibili.com	有了这个她可以随时带小伙伴回来玩，你操啥心	611.14900,1,25,16777215,1515500839,0,da9ea801,4169078275,3	1515500839	611.14900	4169078275	,0,	da9ea801	16777215	1,25	6000		0		0		k-v	0
29495211		chat.bilibili.com	行了行了，别把你的想象随便套，就算人家假面，人家也有钱，手动狗头	563.78000,1,25,16777215,1515500650,0,da9ea801,4169075466,3	1515500650	563.78000	4169075466	,0,	da9ea801	16777215	1,25	6000		0		0		k-v	0
29495211		chat.bilibili.com	还缺仆人吗	86.56400,1,25,16777215,1515500296,0,7fca42ff,4169069099,3	1515500296	86.56400	4169069099	,0,	7fca42ff	16777215	1,25	6000		0		0		k-v	0
29495211		chat.bilibili.com	小猪佩奇的碗????????????	743.36300,1,25,16777215,1515500051,0,ccfaa37,4169049390,3	1515500051	743.36300	4169049390	,0,	ccfaa37	16777215	1,25	6000		0		0		k-v	0
29495211		chat.bilibili.com	论投胎的重要性	516.23200,1,25,16777215,1515499208,0,451a018,4169008712,3	1515499208	516.23200	4169008712	,0,	451a018	16777215	1,25	6000		0		0		k-v	0
29495211		chat.bilibili.com	我可能会迷路	85.81000,1,25,16777215,1515497830,0,dee9ab61,4168957313,3	1515497830	85.81000	4168957313	,0,	dee9ab61	16777215	1,25	6000		0		0		k-v	0
29495211		chat.bilibili.com	你以为有钱人是你想的那么幸福吗？不，有钱人的幸福你想象不到	101.58700,1,25,16777215,1515497941,0,3ec087a2,4168956210,3	1515497941	101.58700	4168956210	,0,	3ec087a2	16777215	1,25	6000		0		0		k-v	0
29495211		chat.bilibili.com	哈哈哈哈哈哈	427.83700,1,25,16777215,1515497508,0,4d84fc90,4168938316,3	1515497508	427.83700	4168938316	,0,	4d84fc90	16777215	1,25	6000		0		0		k-v	0
29495211		chat.bilibili.com	美国drama的想到了比利弗娇妻	248.57000,1,25,16777215,1515496899,0,4701596c,4168911770,3	1515496899	248.57000	4168911770	,0,	4701596c	16777215	1,25	6000		0		0		k-v	0
29495211		chat.bilibili.com	比起跟有钱人结婚还是投胎在有钱人家相对好	172.49600,1,25,16777215,1515496601,0,4701596c,4168898758,3	1515496601	172.49600	4168898758	,0,	4701596c	16777215	1,25	6000		0		0		k-v	0
29495211		chat.bilibili.com	没人一起玩+1	595.24300,1,25,16777215,1515496469,0,fb8ef85d,4168898362,3	1515496469	595.24300	4168898362	,0,	fb8ef85d	16777215	1,25	6000		0		0		k-v	0
29495211		chat.bilibili.com	何以解忧，唯有暴富啊	70.89400,1,25,16777215,1515496126,0,4701596c,4168892873,3	1515496126	70.89400	4168892873	,0,	4701596c	16777215	1,25	6000		0		0		k-v	0
29495211		chat.bilibili.com	我羡慕他们女儿2333	53.32600,1,25,16777215,1515496309,0,4701596c,4168891453,3	1515496309	53.32600	4168891453	,0,	4701596c	16777215	1,25	6000		0		0		k-v	0
29495211		chat.bilibili.com	感谢字幕罗	314.16400,1,25,16777215,1515495294,0,e13af179,4168846124,3	1515495294	314.16400	4168846124	,0,	e13af179	16777215	1,25	6000		0		0		k-v	0
29495211		chat.bilibili.com	有野生字幕君吗	20.17800,1,25,16777215,1515493162,0,a70757db,4168766533,3	1515493162	20.17800	4168766533	,0,	a70757db	16777215	1,25	6000		0		0		k-v	0
29495211		chat.bilibili.com	尴尬个屁，看着宠溺的	635.45200,1,25,16777215,1515489988,0,f2fd6b2f,4168663906,3	1515489988	635.45200	4168663906	,0,	f2fd6b2f	16777215	1,25	6000		0		0		k-v	0
29495211		chat.bilibili.com	感謝字幕君	25.30200,1,25,16777215,1515489167,0,287cf7af,4168641642,3	1515489167	25.30200	4168641642	,0,	287cf7af	16777215	1,25	6000		0		0		k-v	0
29495211		chat.bilibili.com	有翻译真好	68.74300,1,25,16777215,1515487590,0,1c0ceeb,4168599430,3	1515487590	68.74300	4168599430	,0,	1c0ceeb	16777215	1,25	6000		0		0		k-v	0
29495211		chat.bilibili.com	我经常要工作一两个早上	1123.99100,4,18,0,1515487478,1,6210fef9,4168593426,3	1515487478	1123.99100	4168593426	,1,	6210fef9	0	4,18	6000		0		0		k-v	0
29495211		chat.bilibili.com	人们说我不工作的时候我还是觉得蛮烦人的	1114.44900,4,18,0,1515487440,1,6210fef9,4168592506,3	1515487440	1114.44900	4168592506	,1,	6210fef9	0	4,18	6000		0		0		k-v	0
29495211		chat.bilibili.com	可眼光可好了善于发现有潜力的人 这是很难的	1106.84600,4,18,0,1515487374,1,6210fef9,4168590946,2	1515487374	1106.84600	4168590946	,1,	6210fef9	0	4,18	6000		0		0		k-v	0
29495211		chat.bilibili.com	我没有创造力但我喜欢与有创造力的人工作呀	1092.17600,4,18,0,1515487332,1,6210fef9,4168589941,2	1515487332	1092.17600	4168589941	,1,	6210fef9	0	4,18	6000		0		0		k-v	0		语气词
29495211		chat.bilibili.com	我帮助它们业务发展发现机会还有享受love 这比买卖房子有趣的多了	1079.07400,4,18,0,1515487200,1,6210fef9,4168586687,2	1515487200	1079.07400	4168586687	,1,	6210fef9	0	4,18	6000		0		0		k-v	0
29495211		chat.bilibili.com	黑色和金色是我最喜欢的组合	1055.56200,4,25,0,1515486749,1,6210fef9,4168575488,2	1515486749	1055.56200	4168575488	,1,	6210fef9	0	4,25	6000		0		0		k-v	0
29495211		chat.bilibili.com	但是菲菲习惯早起，所以我现在也开始早起了	742.70300,4,25,16777215,1515486355,0,fdac901b,4168565779,2	1515486355	742.70300	4168565779	,0,	fdac901b	16777215	4,25	6000		0		0		k-v	0		有标点符号
29495211		chat.bilibili.com	他几乎不早起	739.58700,4,25,16777215,1515486307,0,fdac901b,4168564606,2	1515486307	739.58700	4168564606	,0,	fdac901b	16777215	4,25	6000		0		0		k-v	0
29495211		chat.bilibili.com	J是个夜猫子	736.10900,4,25,16777215,1515486283,0,fdac901b,4168564013,2	1515486283	736.10900	4168564013	,0,	fdac901b	16777215	4,25	6000		0		0		k-v	0
29495211		chat.bilibili.com	哇靠好想要	984.47800,1,25,16777215,1515482995,0,a40226b2,4168478125,2	1515482995	984.47800	4168478125	,0,	a40226b2	16777215	1,25	6000		0		0		k-v	0
29495211		chat.bilibili.com	感觉。。。。不太真实啊	2423.27200,1,25,16777215,1515481933,0,e32ab001,4168447887,2	1515481933	2423.27200	4168447887	,0,	e32ab001	16777215	1,25	6000		0		0		k-v	0
29495211		chat.bilibili.com	想当那只狗哈哈哈	103.69800,1,25,16777215,1515482028,0,a40226b2,4168447104,2	1515482028	103.69800	4168447104	,0,	a40226b2	16777215	1,25	6000		0		0		k-v	0
29495211		chat.bilibili.com	最右的小女孩也漂亮！	2504.97200,1,25,16777215,1515479599,0,4e1182d6,4168390245,2	1515479599	2504.97200	4168390245	,0,	4e1182d6	16777215	1,25	6000		0		0		k-v	0
29495211		chat.bilibili.com	3万的包	1027.00000,1,25,16777215,1515478513,0,227bbb88,4168364870,2	1515478513	1027.00000	4168364870	,0,	227bbb88	16777215	1,25	6000		0		0		k-v	0
29495211		chat.bilibili.com	那个小女孩的项链不一般	503.00000,1,25,16777215,1515477950,0,227bbb88,4168353979,2	1515477950	503.00000	4168353979	,0,	227bbb88	16777215	1,25	6000		0		0		k-v	0
29495211		chat.bilibili.com	人家当然有专人在没醒前帮忙化好妆了啦（滑稽）	107.70100,1,18,16777215,1515477914,0,5c89ccd4,4168350024,2	1515477914	107.70100	4168350024	,0,	5c89ccd4	16777215	1,18	6000		0		0		k-v	0
29495211		chat.bilibili.com	本人都习惯了吧估计，毕竟社交场合职业微笑还是蛮必要的	1615.93800,1,25,16777215,1515477320,0,ee5af78c,4168334649,2	1515477320	1615.93800	4168334649	,0,	ee5af78c	16777215	1,25	6000		0		0		k-v	0
29495211		chat.bilibili.com	醒来妆发已经好了2333	101.23600,1,25,16777215,1515477067,0,7360c1d4,4168328315,2	1515477067	101.23600	4168328315	,0,	7360c1d4	16777215	1,25	6000		0		0		k-v	0
29495211		chat.bilibili.com	社交名媛嘛	1619.71000,1,25,16777215,1515476568,0,c0338448,4168314128,2	1515476568	1619.71000	4168314128	,0,	c0338448	16777215	1,25	6000		0		0		k-v	0
29495211		chat.bilibili.com	在镜头面前是会尴尬些吧。。。	634.46200,1,25,16777215,1515475555,0,c0338448,4168283646,2	1515475555	634.46200	4168283646	,0,	c0338448	16777215	1,25	6000		0		0		k-v	0
29495211		chat.bilibili.com	耿文瑞	1449.07700,1,25,16777215,1515475463,0,91fbeeda,4168280039,2	1515475463	1449.07700	4168280039	,0,	91fbeeda	16777215	1,25	6000		0		0		k-v	0
29495211		chat.bilibili.com	丙哥	1442.08700,1,25,16777215,1515475455,0,91fbeeda,4168279794,2	1515475455	1442.08700	4168279794	,0,	91fbeeda	16777215	1,25	6000		0		0		k-v	0
29495211		chat.bilibili.com	很像Blair	390.74500,1,25,16777215,1515474966,0,c0338448,4168274786,2	1515474966	390.74500	4168274786	,0,	c0338448	16777215	1,25	6000		0		0		k-v	0
29495211		chat.bilibili.com	没人吗	746.00500,1,25,16777215,1515474691,0,f1c47210,4168254473,2	1515474691	746.00500	4168254473	,0,	f1c47210	16777215	1,25	6000		0		0		k-v	0
29495211		chat.bilibili.com	吴沛芮你我知道你在看	474.38300,1,25,16777215,1515474332,0,91fbeeda,4168246436,2	1515474332	474.38300	4168246436	,0,	91fbeeda	16777215	1,25	6000		0		0		k-v	0
29495211		chat.bilibili.com	一刻不停的笑，她脸都不会酸的吗？	1609.05200,1,25,16777215,1515473332,0,dfae9451,4168206524,2	1515473332	1609.05200	4168206524	,0,	dfae9451	16777215	1,25	6000		0		0		k-v	0
29495211		chat.bilibili.com	love runs out	15.97300,1,25,16777215,1515471240,0,3fcd8dcf,4168138335,2	1515471240	15.97300	4168138335	,0,	3fcd8dcf	16777215	1,25	6000		0		0		k-v	0
29495211		chat.bilibili.com	有些人面对镜头就会紧张，这很正常啊	1429.37600,1,25,16777215,1515470035,0,6237cca8,4168113083,2	1515470035	1429.37600	4168113083	,0,	6237cca8	16777215	1,25	6000		0		0		k-v	0
29495211		chat.bilibili.com	没看过了不起的麦瑟尔夫人吗	115.22000,1,25,16777215,1515470109,0,2c058e89,4168107093,2	1515470109	115.22000	4168107093	,0,	2c058e89	16777215	1,25	6000		0		0		k-v	0
29495211		chat.bilibili.com	这个T恤哈哈啊哈，the boss	982.52900,1,25,16777215,1515469829,0,6237cca8,4168101110,2	1515469829	982.52900	4168101110	,0,	6237cca8	16777215	1,25	6000		0		0		k-v	0
29495211		chat.bilibili.com	夫人的嘴好好看	622.55000,1,25,16777215,1515469369,0,f5820d0c,4168090573,2	1515469369	622.55000	4168090573	,0,	f5820d0c	16777215	1,25	6000		0		0		k-v	0
29495211		chat.bilibili.com	新娘胖了好多 不过还是美的	311.16900,1,25,16777215,1515466678,0,871f03dd,4168030091,2	1515466678	311.16900	4168030091	,0,	871f03dd	16777215	1,25	6000		0		0		k-v	0
29495211		chat.bilibili.com	好美啊	305.38800,5,25,16777215,1515464955,0,2402755,4167997504,2	1515464955	305.38800	4167997504	,0,	2402755	16777215	5,25	6000		0		0		k-v	0
29495211		chat.bilibili.com	我女儿也喜欢站这样爸爸身上	181.19000,1,25,16777215,1515464861,0,10319437,4167995964,2	1515464861	181.19000	4167995964	,0,	10319437	16777215	1,25	6000		0		0		k-v	0
29495211		chat.bilibili.com	妹子很美诶	151.95100,4,25,16777215,1515464459,0,2402755,4167994848,2	1515464459	151.95100	4167994848	,0,	2402755	16777215	4,25	6000		0		0		k-v	0
29495211		chat.bilibili.com	这孩子真会投胎	164.27100,1,25,16777215,1515464517,0,bbb6b134,4167989976,2	1515464517	164.27100	4167989976	,0,	bbb6b134	16777215	1,25	6000		0		0		k-v	0
29495211		chat.bilibili.com	一个大穷人，给我推荐这个算什么意思啊????????????	12.14200,1,25,16777215,1515463766,0,5bdf5b1b,4167977593,2	1515463766	12.14200	4167977593	,0,	5bdf5b1b	16777215	1,25	6000		0		0		k-v	0
29495211		chat.bilibili.com	我的lucky number，3是菲菲的年龄，17是菲菲的生日，28是tamara的生日	2179.83300,1,25,16777215,1515462101,0,53d2b454,4167950963,2	1515462101	2179.83300	4167950963	,0,	53d2b454	16777215	1,25	6000		0		0		k-v	0		有标点符号	保留部分英文
29495211		chat.bilibili.com	我们看看还有什么其他东西？	2070.40500,4,25,16711680,1515461822,0,53d2b454,4167947137,2	1515461822	2070.40500	4167947137	,0,	53d2b454	16711680	4,25	6000		0		0		k-v	0		有标点符号
29495211		chat.bilibili.com	天啊，菲菲，你喜欢么？	2063.22500,4,25,13260,1515461803,0,53d2b454,4167946886,2	1515461803	2063.22500	4167946886	,0,	53d2b454	13260	4,25	6000		0		0		k-v	0		有标点符号
29495211		chat.bilibili.com	说不羡慕是假的	95.29500,1,25,16777215,1515459280,0,2ecfafa8,4167915535,2	1515459280	95.29500	4167915535	,0,	2ecfafa8	16777215	1,25	6000		0		0		k-v	0
29495211		chat.bilibili.com	那就慢走不送咯	2649.65800,1,25,16777215,1515456050,0,3f687f9b,4167889734,2	1515456050	2649.65800	4167889734	,0,	3f687f9b	16777215	1,25	6000		0		0		k-v	0
29495211		chat.bilibili.com	嗯 跟威廉凯特住很近	71.88700,1,25,16777215,1515453449,0,6cbf63d8,4167874442,2	1515453449	71.88700	4167874442	,0,	6cbf63d8	16777215	1,25	6000		0		0		k-v	0
29495211		chat.bilibili.com	羡慕	174.59600,1,25,16777215,1515445795,0,e77e5d8c,4167842158,2	1515445795	174.59600	4167842158	,0,	e77e5d8c	16777215	1,25	6000		0		0		k-v	0
29495211		chat.bilibili.com	孩子会投胎	166.75100,1,25,16777215,1515443566,0,110c3b57,4167831884,2	1515443566	166.75100	4167831884	,0,	110c3b57	16777215	1,25	6000		0		0		k-v	0
29495211		chat.bilibili.com	女主人的高级伦敦腔	348.02200,1,25,16777215,1515441847,0,f5244823,4167822750,2	1515441847	348.02200	4167822750	,0,	f5244823	16777215	1,25	6000		0		0		k-v	0
29495211		chat.bilibili.com	但是男女主互看对方时微尴尬	622.85200,1,25,16777215,1515441364,0,9f3e08b6,4167819995,2	1515441364	622.85200	4167819995	,0,	9f3e08b6	16777215	1,25	6000		0		0		k-v	0
29495211		chat.bilibili.com	论投胎的重要性	70.62300,1,25,16777215,1515431414,0,213736b8,4167694009,2	1515431414	70.62300	4167694009	,0,	213736b8	16777215	1,25	6000		0		0		k-v	0
29495211		chat.bilibili.com	接地气的家庭……	758.50300,1,25,16777215,1515429818,0,eaefc86d,4167647647,2	1515429818	758.50300	4167647647	,0,	eaefc86d	16777215	1,25	6000		0		0		k-v	0
29495211		chat.bilibili.com	50个佣人	364.90100,1,25,16777215,1515429539,0,eaefc86d,4167635545,2	1515429539	364.90100	4167635545	,0,	eaefc86d	16777215	1,25	6000		0		0		k-v	0
29495211		chat.bilibili.com	非常羡慕了。。	592.61400,4,25,16777215,1515427710,0,5e332d7,4167573460,2	1515427710	592.61400	4167573460	,0,	5e332d7	16777215	4,25	6000		0		0		k-v	0
29495211		chat.bilibili.com	我记得她很美	302.30800,4,25,16777215,1515427433,0,5e332d7,4167562968,2	1515427433	302.30800	4167562968	,0,	5e332d7	16777215	4,25	6000		0		0		k-v	0
29495211		chat.bilibili.com	我记得我穿着礼服走上红毯	298.00900,4,25,16777215,1515427422,0,5e332d7,4167562529,2	1515427422	298.00900	4167562529	,0,	5e332d7	16777215	4,25	6000		0		0		k-v	0
29495211		chat.bilibili.com	女儿：“妈妈保护我不会受伤可以吗”	242.75200,4,25,16777215,1515427346,0,5e332d7,4167559494,2	1515427346	242.75200	4167559494	,0,	5e332d7	16777215	4,25	6000		0		0		k-v	0		冒号 引号
29495211		chat.bilibili.com	暂停看蓝字	68.63700,1,25,16777215,1515427294,0,9e5f35c1,4167557447,2	1515427294	68.63700	4167557447	,0,	9e5f35c1	16777215	1,25	6000		0		0		k-v	0
29495211		chat.bilibili.com	妻子和女儿经常性地“虐待我”	172.84400,4,25,16777215,1515427266,0,5e332d7,4167556338,2	1515427266	172.84400	4167556338	,0,	5e332d7	16777215	4,25	6000		0		0		k-v	0		有标点符号
29495211		chat.bilibili.com	女主的眉毛看着好别扭	601.36000,1,25,16777215,1515427142,0,43799466,4167552087,2	1515427142	601.36000	4167552087	,0,	43799466	16777215	1,25	6000		0		0		k-v	0
29495211		chat.bilibili.com	1	1807.25800,1,25,16777215,1515425938,0,bdab3323,4167498243,2	1515425938	1807.25800	4167498243	,0,	bdab3323	16777215	1,25	6000		0		0		k-v	0
29495211		chat.bilibili.com	配合拍摄吧	125.12900,1,25,16777215,1515425015,0,6714a504,4167460640,2	1515425015	125.12900	4167460640	,0,	6714a504	16777215	1,25	6000		0		0		k-v	0
29495211		chat.bilibili.com	说假面不要太酸了吧。。	570.94700,1,25,16777215,1515424409,0,6feab181,4167424522,2	1515424409	570.94700	4167424522	,0,	6feab181	16777215	1,25	6000		0		0		k-v	0
29495211		chat.bilibili.com	她还好啦。明显也是会厨艺	813.75800,1,25,16777215,1515423572,0,6018a417,4167382052,2	1515423572	813.75800	4167382052	,0,	6018a417	16777215	1,25	6000		0		0		k-v	0
29495211		chat.bilibili.com	还可以吧，你不懂有钱人的世界	565.02800,1,25,16777215,1515423480,0,6018a417,4167377212,2	1515423480	565.02800	4167377212	,0,	6018a417	16777215	1,25	6000		0		0		k-v	0
29495211		chat.bilibili.com	太幸福了吧女儿	513.92700,1,25,16777215,1515423429,0,6018a417,4167374555,2	1515423429	513.92700	4167374555	,0,	6018a417	16777215	1,25	6000		0		0		k-v	0
29495211		chat.bilibili.com	完全自己带孩子也算是蛮负责了	492.00900,1,25,16777215,1515423389,0,6018a417,4167373435,2	1515423389	492.00900	4167373435	,0,	6018a417	16777215	1,25	6000		0		0		k-v	0
29495211		chat.bilibili.com	羡慕了	352.26800,1,25,16777215,1515423310,0,6018a417,4167368401,2	1515423310	352.26800	4167368401	,0,	6018a417	16777215	1,25	6000		0		0		k-v	0
29495211		chat.bilibili.com	kk！	2445.90200,1,25,16777215,1515422635,0,ee5b6839,4167338709,2	1515422635	2445.90200	4167338709	,0,	ee5b6839	16777215	1,25	6000		0		0		k-v	0
29495211		chat.bilibili.com	野生菌坚持住呀还有广大贫苦人民在后面支持你	418.49900,1,25,16777215,1515422746,0,40007d55,4167337979,2	1515422746	418.49900	4167337979	,0,	40007d55	16777215	1,25	6000		0		0		k-v	0
29495211		chat.bilibili.com	这女孩从小这么会吃 易胖体质	2299.82300,1,25,16777215,1515422701,0,ee5b6839,4167335512,2	1515422701	2299.82300	4167335512	,0,	ee5b6839	16777215	1,25	6000		0		0		k-v	0
29495211		chat.bilibili.com	霍霍完了也有人收拾啊	778.00000,1,25,16777215,1515422673,0,1f9b55a7,4167333962,2	1515422673	778.00000	4167333962	,0,	1f9b55a7	16777215	1,25	6000		0		0		k-v	0
29495211		chat.bilibili.com	像家族联姻	265.92000,1,25,16777215,1515422565,0,40007d55,4167328122,2	1515422565	265.92000	4167328122	,0,	40007d55	16777215	1,25	6000		0		0		k-v	0
29495211		chat.bilibili.com	美国的拍出来就很戏精很drama英国这家竟然比较平和	242.23000,1,25,16777215,1515422529,0,40007d55,4167326105,2	1515422529	242.23000	4167326105	,0,	40007d55	16777215	1,25	6000		0		0		k-v	0
29495211		chat.bilibili.com	贫友们 再见	596.00000,1,25,16777215,1515422473,0,1f9b55a7,4167323961,2	1515422473	596.00000	4167323961	,0,	1f9b55a7	16777215	1,25	6000		0		0		k-v	0
29495211		chat.bilibili.com	爸爸跟女儿好亲呀哈哈哈	160.96000,1,25,16777215,1515422057,0,40007d55,4167318804,2	1515422057	160.96000	4167318804	,0,	40007d55	16777215	1,25	6000		0		0		k-v	0
29495211		chat.bilibili.com	好快	262.51100,1,25,16777215,1515422384,0,6e0a78af,4167318130,2	1515422384	262.51100	4167318130	,0,	6e0a78af	16777215	1,25	6000		0		0		k-v	0
29495211		chat.bilibili.com	吃力的啃生肉	212.94300,1,25,16777215,1515422335,0,6e0a78af,4167315479,2	1515422335	212.94300	4167315479	,0,	6e0a78af	16777215	1,25	6000		0		0		k-v	0
29495211		chat.bilibili.com	bossy	852.86200,1,25,16777215,1515421606,0,ee5b6839,4167282012,2	1515421606	852.86200	4167282012	,0,	ee5b6839	16777215	1,25	6000		0		0		k-v	0
29495211		chat.bilibili.com	所以你们俩母女都胖胖的 只有老公这么瘦	739.17100,1,25,16777215,1515421595,0,ee5b6839,4167276209,2	1515421595	739.17100	4167276209	,0,	ee5b6839	16777215	1,25	6000		0		0		k-v	0
29495211		chat.bilibili.com	我大概都听不懂。	209.94200,1,25,16777215,1515421351,0,b0bdf04e,4167263968,2	1515421351	209.94200	4167263968	,0,	b0bdf04e	16777215	1,25	6000		0		0		k-v	0
29495211		chat.bilibili.com	茶端上去就凉拉吧	89.87300,1,25,16777215,1515420604,0,72934ae,4167224258,2	1515420604	89.87300	4167224258	,0,	72934ae	16777215	1,25	6000		0		0		k-v	0
29495211		chat.bilibili.com	弹幕呢	880.16300,1,25,16777215,1515420231,0,cb100b49,4167205534,2	1515420231	880.16300	4167205534	,0,	cb100b49	16777215	1,25	6000		0		0		k-v	0
29495211		chat.bilibili.com	哦你家真的自己做饭	761.78100,1,25,14811775,1515419605,0,9247c7c5,4167191352,2	1515419605	761.78100	4167191352	,0,	9247c7c5	14811775	1,25	6000		0		0		k-v	0
29495211		chat.bilibili.com	没刷牙	124.14400,1,25,16777215,1515419904,0,5219e346,4167189499,2	1515419904	124.14400	4167189499	,0,	5219e346	16777215	1,25	6000		0		0		k-v	0
29495211		chat.bilibili.com	我试着不要宠坏菲菲	602.66700,1,25,14811775,1515419763,0,9247c7c5,4167182687,2	1515419763	602.66700	4167182687	,0,	9247c7c5	14811775	1,25	6000		0		0		k-v	0
29495211		chat.bilibili.com	这个包三万块	1019.93700,1,25,16777215,1515419101,0,86a89a7f,4167166653,2	1515419101	1019.93700	4167166653	,0,	86a89a7f	16777215	1,25	6000		0		0		k-v	0
29495211		chat.bilibili.com	假装英语八级	56.78900,1,25,16777215,1515419348,0,cb100b49,4167162225,2	1515419348	56.78900	4167162225	,0,	cb100b49	16777215	1,25	6000		0		0		k-v	0
29495211		chat.bilibili.com	化完妆再躺回床上假装刚起床 不真实啊	202.87100,1,25,16777215,1515418927,0,4b2e2bdc,4167147968,2	1515418927	202.87100	4167147968	,0,	4b2e2bdc	16777215	1,25	6000		0		0		k-v	0
29495211		chat.bilibili.com	我觉得女主有点像阿呆	350.57600,1,25,16777215,1515418407,0,2d8ce5fa,4167117066,2	1515418407	350.57600	4167117066	,0,	2d8ce5fa	16777215	1,25	6000		0		0		k-v	0
29495211		chat.bilibili.com	这个女的越看越烦，没内涵，断了不看，你们继续	2636.91000,1,25,16777215,1515417307,0,455764d3,4167063525,2	1515417307	2636.91000	4167063525	,0,	455764d3	16777215	1,25	6000		0		0		k-v	0
29495211		chat.bilibili.com	当我出差，我带着菲菲，这样她也能见到些有趣的事情	966.08900,4,18,16777215,1515416776,0,53d2b454,4167038337,2	1515416776	966.08900	4167038337	,0,	53d2b454	16777215	4,18	6000		0		0		k-v	0
29495211		chat.bilibili.com	走一年	91.41800,1,25,16777215,1515416707,0,e27663aa,4167035201,2	1515416707	91.41800	4167035201	,0,	e27663aa	16777215	1,25	6000		0		0		k-v	0
29495211		chat.bilibili.com	选玩具吧 哪个是你最喜欢的	949.62600,4,25,16777215,1515416639,0,53d2b454,4167032036,2	1515416639	949.62600	4167032036	,0,	53d2b454	16777215	4,25	6000		0		0		k-v	0
29495211		chat.bilibili.com	男的长的帅	400.19100,1,25,16777215,1515416241,0,42cccd21,4167014216,2	1515416241	400.19100	4167014216	,0,	42cccd21	16777215	1,25	6000		0		0		k-v	0
29495211		chat.bilibili.com	卧槽！	577.27400,1,25,16777215,1515415852,0,65c2633e,4167011987,2	1515415852	577.27400	4167011987	,0,	65c2633e	16777215	1,25	6000		0		0		k-v	0
29495211		chat.bilibili.com	哈哈哈哈哈好辛苦	339.03400,1,25,16777215,1515415945,0,65c2633e,4167001102,2	1515415945	339.03400	4167001102	,0,	65c2633e	16777215	1,25	6000		0		0		k-v	0
29495211		chat.bilibili.com	这个女主人很好的样子	235.65800,1,25,16777215,1515415837,0,65c2633e,4166996272,2	1515415837	235.65800	4166996272	,0,	65c2633e	16777215	1,25	6000		0		0		k-v	0
29495211		chat.bilibili.com	摄影师没有儿童摄影经验吗完全没有互动的	2396.39500,1,25,16777215,1515415176,0,82eb0700,4166966803,2	1515415176	2396.39500	4166966803	,0,	82eb0700	16777215	1,25	6000		0		0		k-v	0
29495211		chat.bilibili.com	豪无人性	581.97000,1,25,16777215,1515415081,0,7deb6b88,4166962669,2	1515415081	581.97000	4166962669	,0,	7deb6b88	16777215	1,25	6000		0		0		k-v	0
29495211		chat.bilibili.com	感觉在帮孩子选真人玩具	1796.71600,1,25,16777215,1515414555,0,82eb0700,4166939317,2	1515414555	1796.71600	4166939317	,0,	82eb0700	16777215	1,25	6000		0		0		k-v	0
29495211		chat.bilibili.com	哈哈哈哈野生菌	421.71200,1,25,16777215,1515414111,0,3eb1e129,4166920959,2	1515414111	421.71200	4166920959	,0,	3eb1e129	16777215	1,25	6000		0		0		k-v	0
29495211		chat.bilibili.com	不是吧，在床上睡醒了竟然是带着妆的？	105.28100,1,25,16777215,1515413832,0,fb3047e3,4166908435,2	1515413832	105.28100	4166908435	,0,	fb3047e3	16777215	1,25	6000		0		0		k-v	0
29495211		chat.bilibili.com	木兰的扮演者还有天赋异禀中的闪烁吗	1668.79700,1,25,16777215,1515413148,0,7699c8a9,4166879604,2	1515413148	1668.79700	4166879604	,0,	7699c8a9	16777215	1,25	6000		0		0		k-v	0
29495211		chat.bilibili.com	现代版的唐顿庄园	378.55500,1,25,16777215,1515413122,0,82eb0700,4166878490,2	1515413122	378.55500	4166878490	,0,	82eb0700	16777215	1,25	6000		0		0		k-v	0
29495211		chat.bilibili.com	是有教育方法的妈妈~蛮好的	2345.66300,1,18,16777215,1515413111,0,4ecc33cc,4166877997,2	1515413111	2345.66300	4166877997	,0,	4ecc33cc	16777215	1,18	6000		0		0		k-v	0
29495211		chat.bilibili.com	贫穷限制了我的想象力	61.08100,1,25,16777215,1515412573,0,2011029f,4166855187,2	1515412573	61.08100	4166855187	,0,	2011029f	16777215	1,25	6000		0		0		k-v	0
29495211		chat.bilibili.com	笑得非常不自然……	1412.56400,1,25,9599289,1515412419,0,499dcc0b,4166853906,2	1515412419	1412.56400	4166853906	,0,	499dcc0b	9599289	1,25	6000		0		0		k-v	0
29495211		chat.bilibili.com	不是说三角形是最稳定的吗? 我们三人组成了这个家庭	138.69200,1,25,16777215,1515411080,0,3ebc6e27,4166797885,2	1515411080	138.69200	4166797885	,0,	3ebc6e27	16777215	1,25	6000		0		0		k-v	0		有标点符号	反问句
29495211		chat.bilibili.com	还缺女儿吗	596.76900,1,25,16777215,1515410500,0,fa431479,4166773666,2	1515410500	596.76900	4166773666	,0,	fa431479	16777215	1,25	6000		0		0		k-v	0
29495211		chat.bilibili.com	我喜欢	586.14100,1,25,16777215,1515410489,0,fa431479,4166773249,2	1515410489	586.14100	4166773249	,0,	fa431479	16777215	1,25	6000		0		0		k-v	0
29495211		chat.bilibili.com	我也想做dog walker啊	374.83900,1,25,16777215,1515409555,0,bdab3323,4166730064,2	1515409555	374.83900	4166730064	,0,	bdab3323	16777215	1,25	6000		0		0		k-v	0
29495211		chat.bilibili.com	不好意思刚刚没听清 是make sure U don't get hurt	245.27700,1,25,16777215,1515408668,0,feca553e,4166692618,2	1515408668	245.27700	4166692618	,0,	feca553e	16777215	1,25	6000		0		0		k-v	0
29495211		chat.bilibili.com	Make sure don't get hurt, ok？就听懂一句	239.64000,1,25,16777215,1515408599,0,feca553e,4166689912,2	1515408599	239.64000	4166689912	,0,	feca553e	16777215	1,25	6000		0		0		k-v	0
29495211		chat.bilibili.com	小罗伯特唐尼和高司令的结合体	178.54100,1,25,16777215,1515408433,0,feca553e,4166684097,2	1515408433	178.54100	4166684097	,0,	feca553e	16777215	1,25	6000		0		0		k-v	0
29495211		chat.bilibili.com	第一条是我～	0.32800,1,25,16777215,1515404646,0,23858104,4166549071,2	1515404646	0.32800	4166549071	,0,	23858104	16777215	1,25	6000		0		0		k-v	0
29495211		chat.bilibili.com	这个鼻子好违和	144.24200,1,25,16777215,1515404022,0,c6e1b772,4166530847,2	1515404022	144.24200	4166530847	,0,	c6e1b772	16777215	1,25	6000		0		0		k-v	0
29495211		chat.bilibili.com	感觉她们家小孩没有朋友。	1781.73900,1,25,16777215,1515402354,0,ed3adb0d,4166478624,2	1515402354	1781.73900	4166478624	,0,	ed3adb0d	16777215	1,25	6000		0		0		k-v	0
29495211		chat.bilibili.com	主动权	1861.16600,1,25,16777215,1515398210,0,9f7d8748,4166370413,2	1515398210	1861.16600	4166370413	,0,	9f7d8748	16777215	1,25	6000		0		0		k-v	0
29495211		chat.bilibili.com	阿黛尔➕1	1251.02700,1,25,16777215,1515397486,0,9f7d8748,4166352809,2	1515397486	1251.02700	4166352809	,0,	9f7d8748	16777215	1,25	6000		0		0		k-v	0
29495211		chat.bilibili.com	包质量杠杠的	1029.33600,1,25,16777215,1515397255,0,9f7d8748,4166347330,2	1515397255	1029.33600	4166347330	,0,	9f7d8748	16777215	1,25	6000		0		0		k-v	0
29495211		chat.bilibili.com	力气好大	1021.25000,1,25,16777215,1515397236,0,9f7d8748,4166346885,2	1515397236	1021.25000	4166346885	,0,	9f7d8748	16777215	1,25	6000		0		0		k-v	0
29495211		chat.bilibili.com	人，生而不平等。	688.91500,1,25,16777215,1515396981,0,4a142edd,4166340664,2	1515396981	688.91500	4166340664	,0,	4a142edd	16777215	1,25	6000		0		0		k-v	0
29495211		chat.bilibili.com	这冰箱	770.64000,1,25,16777215,1515396980,0,9f7d8748,4166340632,2	1515396980	770.64000	4166340632	,0,	9f7d8748	16777215	1,25	6000		0		0		k-v	0
29495211		chat.bilibili.com	狒狒哈哈哈	223.63600,1,25,16777215,1515396911,0,55aec736,4166338996,2	1515396911	223.63600	4166338996	,0,	55aec736	16777215	1,25	6000		0		0		k-v	0
29495211		chat.bilibili.com	Sophia sit down 索非亚坐下来	104.37900,4,25,16777215,1515394431,0,15c8b02e,4166278256,2	1515394431	104.37900	4166278256	,0,	15c8b02e	16777215	4,25	6000		0		0		k-v	0		双语字幕
29495211		chat.bilibili.com	Fifi don’t spill it 菲菲别弄洒了	102.42900,4,25,16777215,1515394399,0,15c8b02e,4166277438,2	1515394399	102.42900	4166277438	,0,	15c8b02e	16777215	4,25	6000		0		0		k-v	0		双语字幕
29495211		chat.bilibili.com	Hi, Fifi. – Get out of it you, trouble 嗨，菲菲 － 快起来了，小坏蛋	95.66700,4,25,0,1515394386,0,15c8b02e,4166277117,2	1515394386	95.66700	4166277117	,0,	15c8b02e	0	4,25	6000		0		0		k-v	0		双语字幕
29495211		chat.bilibili.com	2. 父亲是F1赛车管理协会总裁伯尼·埃克尔斯通，拥有身家36亿美元。	67.82900,5,25,65535,1515394163,0,15c8b02e,4166271695,2	1515394163	67.82900	4166271695	,0,	15c8b02e	65535	5,25	6000		0		0		k-v	0		背景信息
29495211		chat.bilibili.com	but we’re completely bonkers 但我们真的很疯狂	47.69000,5,25,16777215,1515393962,0,15c8b02e,4166266849,2	1515393962	47.69000	4166266849	,0,	15c8b02e	16777215	5,25	6000		0		0		k-v	0
29495211		chat.bilibili.com	（后面居然还有三个推车？！）	46.30100,1,25,16777215,1515393945,0,15c8b02e,4166266387,2	1515393945	46.30100	4166266387	,0,	15c8b02e	16777215	1,25	6000		0		0		k-v	0
29495211		chat.bilibili.com	我们需要这些 － 哦，我最喜欢这个了 － 真有意思 － 最棒的一天	41.61300,4,25,16777215,1515393924,0,15c8b02e,4166265922,2	1515393924	41.61300	4166265922	,0,	15c8b02e	16777215	4,25	6000		0		0		k-v	0
29495211		chat.bilibili.com	we need to get these – oh I love these – so fun – best day ever	41.61300,4,25,16777215,1515393918,0,15c8b02e,4166265790,2	1515393918	41.61300	4166265790	,0,	15c8b02e	16777215	4,25	6000		0		0		k-v	0
29495211		chat.bilibili.com	Slow down 慢点	39.49400,4,25,16777215,1515393790,0,15c8b02e,4166262657,2	1515393790	39.49400	4166262657	,0,	15c8b02e	16777215	4,25	6000		0		0		k-v	0
29495211		chat.bilibili.com	I would say that we are very down-to-earth as a family 我觉得我们一家很接地气	35.23300,4,25,16777215,1515393780,0,15c8b02e,4166262417,2	1515393780	35.23300	4166262417	,0,	15c8b02e	16777215	4,25	6000		0		0		k-v	0
29495211		chat.bilibili.com	一句也听不懂	427.51200,1,25,16777215,1515393726,0,ad4ebb47,4166261045,2	1515393726	427.51200	4166261045	,0,	ad4ebb47	16777215	1,25	6000		0		0		k-v	0
29495211		chat.bilibili.com	(狂笑)	32.36600,4,25,16777215,1515393712,0,15c8b02e,4166260726,2	1515393712	32.36600	4166260726	,0,	15c8b02e	16777215	4,25	6000		0		0		k-v	0
29495211		chat.bilibili.com	我忘了，你是老大。我是老大？ － 不，妈妈是老大	28.92100,4,25,16777215,1515393703,0,15c8b02e,4166260493,2	1515393703	28.92100	4166260493	,0,	15c8b02e	16777215	4,25	6000		0		0		k-v	0
29495211		chat.bilibili.com	I forgot you’re the boss. I’m the boss? – No mom’s the boss	28.92100,4,25,16777215,1515393697,0,15c8b02e,4166260357,2	1515393697	28.92100	4166260357	,0,	15c8b02e	16777215	4,25	6000		0		0		k-v	0
29495211		chat.bilibili.com	That was a good one	27.34200,4,25,16777215,1515393691,0,15c8b02e,4166260190,2	1515393691	27.34200	4166260190	,0,	15c8b02e	16777215	4,25	6000		0		0		k-v	0		简单的就没翻
29495211		chat.bilibili.com	It’s Jay, Fifi, and I 就只有杰，菲菲，和我	22.25700,4,25,16777215,1515393678,0,15c8b02e,4166259893,2	1515393678	22.25700	4166259893	,0,	15c8b02e	16777215	4,25	6000		0		0		k-v	0
29495211		chat.bilibili.com	Hello	21.11500,4,25,16777215,1515393665,0,15c8b02e,4166259616,2	1515393665	21.11500	4166259616	,0,	15c8b02e	16777215	4,25	6000		0		0		k-v	0		简单的就没翻
29495211		chat.bilibili.com	现在跟以前的生活比起来真的完全不一样	16.13900,4,25,16777215,1515393486,0,15c8b02e,4166255136,2	1515393486	16.13900	4166255136	,0,	15c8b02e	16777215	4,25	6000		0		0		k-v	0
29495211		chat.bilibili.com	Life couldn’t be more different to what it was	16.13900,4,25,16777215,1515393479,0,15c8b02e,4166254987,2	1515393479	16.13900	4166254987	,0,	15c8b02e	16777215	4,25	6000		0		0		k-v	0		原文与翻译分开
29495211		chat.bilibili.com	感谢野生字幕组	144.44100,1,25,16777215,1515393434,0,ad4ebb47,4166253846,2	1515393434	144.44100	4166253846	,0,	ad4ebb47	16777215	1,25	6000		0		0		k-v	0
29495211		chat.bilibili.com	感觉已经嗨了一辈子了	15.60900,4,25,16777215,1515393405,0,15c8b02e,4166253140,2	1515393405	15.60900	4166253140	,0,	15c8b02e	16777215	4,25	6000		0		0		k-v	0		原文与翻译分开
29495211		chat.bilibili.com	I’ve had a lifetime of partying	15.60900,4,25,16777215,1515393399,0,15c8b02e,4166253003,2	1515393399	15.60900	4166253003	,0,	15c8b02e	16777215	4,25	6000		0		0		k-v	0
29495211		chat.bilibili.com	Massive stilettos, quite a few sets of eyelashes 超高的细高跟鞋，好几对假睫毛	12.87700,4,25,16777215,1515393388,0,15c8b02e,4166252713,2	1515393388	12.87700	4166252713	,0,	15c8b02e	16777215	4,25	6000		0		0		k-v	0
29495211		chat.bilibili.com	Massive stilettos, quite a few sets of eyelashes 超高的细高跟鞋，好几对假睫毛	11.47500,1,25,16777215,1515393378,0,15c8b02e,4166252414,2	1515393378	11.47500	4166252414	,0,	15c8b02e	16777215	1,25	6000		0		0		k-v	0
29495211		chat.bilibili.com	前面同感	1255.50300,1,25,16777215,1515391469,0,4293e116,4166212835,2	1515391469	1255.50300	4166212835	,0,	4293e116	16777215	1,25	6000		0		0		k-v	0
29495211		chat.bilibili.com	没人一起玩 有啥意思	588.50300,1,25,16777215,1515390920,0,e12a4ec9,4166189441,2	1515390920	588.50300	4166189441	,0,	e12a4ec9	16777215	1,25	6000		0		0		k-v	0
29495211		chat.bilibili.com	BGM. What do I know	88.74600,1,25,16777215,1515390452,0,e7bdc4ec,4166176938,2	1515390452	88.74600	4166176938	,0,	e7bdc4ec	16777215	1,25	6000		0		0		k-v	0
29495211		chat.bilibili.com	人不如狗系列	224.12400,1,25,16777215,1515390294,0,8485147f,4166171776,2	1515390294	224.12400	4166171776	,0,	8485147f	16777215	1,25	6000		0		0		k-v	0
29495211		chat.bilibili.com	这女的脸上的肌肉好奇怪啊	1318.54500,1,25,16777215,1515388975,0,9e635c69,4166129529,2	1515388975	1318.54500	4166129529	,0,	9e635c69	16777215	1,25	6000		0		0		k-v	0
29495211		chat.bilibili.com	sheeran？	84.81500,1,25,16777215,1515388624,0,e0c1929a,4166116129,1	1515388624	84.81500	4166116129	,0,	e0c1929a	16777215	1,25	6000		0		0		k-v	0
29495211		chat.bilibili.com	可以音乐就很有震慑力	56.93500,1,25,16777215,1515388446,0,e0c1929a,4166109688,1	1515388446	56.93500	4166109688	,0,	e0c1929a	16777215	1,25	6000		0		0		k-v	0
29495211		chat.bilibili.com	练听力哈	26.31300,1,25,16777215,1515388402,0,e0c1929a,4166108126,1	1515388402	26.31300	4166108126	,0,	e0c1929a	16777215	1,25	6000		0		0		k-v	0
29495211		chat.bilibili.com	我不会强迫菲菲做任何她不喜欢的事	2045.21900,1,25,16777215,1515386190,0,d8e642e5,4166012580,1	1515386190	2045.21900	4166012580	,0,	d8e642e5	16777215	1,25	6000		0		0		k-v	0
29495211		chat.bilibili.com	哈哈好可爱啊	1913.66700,1,25,16777215,1515386006,0,d8e642e5,4166006033,1	1515386006	1913.66700	4166006033	,0,	d8e642e5	16777215	1,25	6000		0		0		k-v	0
29495211		chat.bilibili.com	我家里不让在床上吃东西	127.22200,1,25,16777215,1515385853,0,eda90238,4166004961,1	1515385853	127.22200	4166004961	,0,	eda90238	16777215	1,25	6000		0		0		k-v	0
29495211		chat.bilibili.com	野生菌呢？	870.53600,1,25,0,1515385962,0,8a53446d,4166004379,1	1515385962	870.53600	4166004379	,0,	8a53446d	0	1,25	6000		0		0		k-v	0
29495211		chat.bilibili.com	哈哈哈哈加油	416.86300,1,25,0,1515385170,0,8a53446d,4165988312,1	1515385170	416.86300	4165988312	,0,	8a53446d	0	1,25	6000		0		0		k-v	0
29495211		chat.bilibili.com	应该是要拍电视才画的	115.06400,1,25,0,1515385155,0,8a53446d,4165976831,1	1515385155	115.06400	4165976831	,0,	8a53446d	0	1,25	6000		0		0		k-v	0
29495211		chat.bilibili.com	跪求野生字幕君	57.01200,1,25,0,1515385071,0,8a53446d,4165974235,1	1515385071	57.01200	4165974235	,0,	8a53446d	0	1,25	6000		0		0		k-v	0
29495211		chat.bilibili.com	唉 同人不同命	663.01900,1,25,16777215,1515384439,0,d68238a4,4165955919,1	1515384439	663.01900	4165955919	,0,	d68238a4	16777215	1,25	6000		0		0		k-v	0
29495211		chat.bilibili.com	我支持她做她想做的事，她做得都对	1323.41100,1,25,16777215,1515384201,0,d8e642e5,4165952944,1	1515384201	1323.41100	4165952944	,0,	d8e642e5	16777215	1,25	6000		0		0		k-v	0
29495211		chat.bilibili.com	晚上是我最喜欢的，和菲菲一起读故事啊超级放松	1274.40200,1,25,16777215,1515383814,0,d8e642e5,4165948401,1	1515383814	1274.40200	4165948401	,0,	d8e642e5	16777215	1,25	6000		0		0		k-v	0
29495211		chat.bilibili.com	我是喜欢刷剧泡茶暖水壶的中年妇女?	1180.44800,1,25,16777215,1515383955,0,d8e642e5,4165943472,1	1515383955	1180.44800	4165943472	,0,	d8e642e5	16777215	1,25	6000		0		0		k-v	0
29495211		chat.bilibili.com	听人说我不工作很烦....我努力工作，对我很重要	1137.42500,1,25,16777215,1515383743,0,d8e642e5,4165938691,1	1515383743	1137.42500	4165938691	,0,	d8e642e5	16777215	1,25	6000		0		0		k-v	0		有标点符号
29495211		chat.bilibili.com	I would say that we are very downtown's family	37.77500,4,25,16707842,1515381975,0,f255b381,4165897498,1	1515381975	37.77500	4165897498	,0,	f255b381	16707842	4,25	6000		0		0		k-v	0
29495211		chat.bilibili.com	完全不知所云，不是这样提高英语来着，我信了	1039.62600,1,25,16777215,1515380286,0,19acde0,4165861435,1	1515380286	1039.62600	4165861435	,0,	19acde0	16777215	1,25	6000		0		0		k-v	0
29495211		chat.bilibili.com	我也想这么无聊	1029.50100,1,25,16777215,1515379420,0,1de4bad6,4165844526,1	1515379420	1029.50100	4165844526	,0,	1de4bad6	16777215	1,25	6000		0		0		k-v	0
29495211		chat.bilibili.com	这里是说她母乳喂养	1326.44000,1,25,16777215,1515379083,0,bd19ecd8,4165838082,1	1515379083	1326.44000	4165838082	,0,	bd19ecd8	16777215	1,25	6000		0		0		k-v	0
29495211		chat.bilibili.com	她连朋友都是面试临时凑的呀	2341.07900,1,25,16777215,1515379020,0,7a8bd847,4165836877,1	1515379020	2341.07900	4165836877	,0,	7a8bd847	16777215	1,25	6000		0		0		k-v	0
29495211		chat.bilibili.com	在床上都化好妆惹	125.21900,1,25,16777215,1515378486,0,c9675abe,4165826926,1	1515378486	125.21900	4165826926	,0,	c9675abe	16777215	1,25	6000		0		0		k-v	0
29495211		chat.bilibili.com	是把泳池改成了游乐场	602.87400,1,25,16777215,1515378386,0,9c7d818b,4165825102,1	1515378386	602.87400	4165825102	,0,	9c7d818b	16777215	1,25	6000		0		0		k-v	0
29495211		chat.bilibili.com	这个英音好听可是真的考验听力	209.07200,1,25,16777215,1515377638,0,d59634c1,4165812149,1	1515377638	209.07200	4165812149	,0,	d59634c1	16777215	1,25	6000		0		0		k-v	0
29495211		chat.bilibili.com	同求 也就听个大概	204.24600,1,25,16777215,1515375870,0,8680485a,4165781061,1	1515375870	204.24600	4165781061	,0,	8680485a	16777215	1,25	6000		0		0		k-v	0
29495211		chat.bilibili.com	有翻译没????	2574.49100,1,25,16777215,1515373966,0,66ca220f,4165755055,1	1515373966	2574.49100	4165755055	,0,	66ca220f	16777215	1,25	6000		0		0		k-v	0
29495211		chat.bilibili.com	这可比比弗利娇妻有钱多了	361.92400,1,25,16777215,1515369777,0,7ef03152,4165713335,1	1515369777	361.92400	4165713335	,0,	7ef03152	16777215	1,25	6000		0		0		k-v	0
29495211		chat.bilibili.com	symphony！！！	251.49400,1,25,16777215,1515369627,0,7ef03152,4165712316,1	1515369627	251.49400	4165712316	,0,	7ef03152	16777215	1,25	6000		0		0		k-v	0
29495211		chat.bilibili.com	no absolutely you are not “down to earth as a family”	774.20000,1,25,16777215,1515368596,0,922c3499,4165705438,1	1515368596	774.20000	4165705438	,0,	922c3499	16777215	1,25	6000		0		0		k-v	0
29495211		chat.bilibili.com	已经化好妆了，再躺回去的	124.83300,1,25,16777215,1515355280,0,9e0697ca,4165635182,1	1515355280	124.83300	4165635182	,0,	9e0697ca	16777215	1,25	6000		0		0		k-v	0
29495211		chat.bilibili.com	伦敦最好街区 皇冠三角	72.08900,1,25,16777215,1515355202,0,9e0697ca,4165634631,1	1515355202	72.08900	4165634631	,0,	9e0697ca	16777215	1,25	6000		0		0		k-v	0
29495211		chat.bilibili.com	有钱人的世界。。。	12.07900,1,25,16777215,1515347099,0,30ccb86e,4165533513,1	1515347099	12.07900	4165533513	,0,	30ccb86e	16777215	1,25	6000		0		0		k-v	0
29495211		chat.bilibili.com	我真的仇富	158.37600,1,25,16777215,1515346350,0,820641e9,4165517294,1	1515346350	158.37600	4165517294	,0,	820641e9	16777215	1,25	6000		0		0		k-v	0
29495211		chat.bilibili.com	神似阿黛尔和高司令(●—●)	1246.98500,1,25,16777215,1515343991,0,b7ca3a64,4165448420,1	1515343991	1246.98500	4165448420	,0,	b7ca3a64	16777215	1,25	6000		0		0		k-v	0
29495211		chat.bilibili.com	这小孩从生下来开始就因富养常登上报纸头条	653.79500,1,25,16777215,1515342123,0,55cac2d4,4165380831,1	1515342123	653.79500	4165380831	,0,	55cac2d4	16777215	1,25	6000		0		0		k-v	0
29495211		chat.bilibili.com	非战斗人员请撤离	1781.66800,1,25,16777215,1515340479,0,607a4288,4165312326,1	1515340479	1781.66800	4165312326	,0,	607a4288	16777215	1,25	6000		0		0		k-v	0
29495211		chat.bilibili.com	好像于晓光	179.48500,1,25,16777215,1515339464,0,22b399e8,4165263136,1	1515339464	179.48500	4165263136	,0,	22b399e8	16777215	1,25	6000		0		0		k-v	0
29495211		chat.bilibili.com	感觉眼睛有点像苏菲	1185.22600,1,25,16777215,1515339386,0,5deecd42,4165259308,1	1515339386	1185.22600	4165259308	,0,	5deecd42	16777215	1,25	6000		0		0		k-v	0
29495211		chat.bilibili.com	贫穷限制我的想象	542.76600,1,25,16777215,1515339296,0,a175c085,4165254930,1	1515339296	542.76600	4165254930	,0,	a175c085	16777215	1,25	6000		0		0		k-v	0
29495211		chat.bilibili.com	刚睡醒就化好妆了？	111.85500,1,25,16777215,1515338493,0,43342e98,4165214164,1	1515338493	111.85500	4165214164	,0,	43342e98	16777215	1,25	6000		0		0		k-v	0
29495211		chat.bilibili.com	反正就是要送孩子去托儿所很难过	2660.93400,4,25,16776960,1515337510,1,1b110846,4165152709,1	1515337510	2660.93400	4165152709	,1,	1b110846	16776960	4,25	6000		0		0		k-v	0
29495211		chat.bilibili.com	要送菲菲去托儿所咯	2642.08000,4,25,16776960,1515337470,1,1b110846,4165150511,1	1515337470	2642.08000	4165150511	,1,	1b110846	16776960	4,25	6000		0		0		k-v	0
29495211		chat.bilibili.com	大概在聊画廊的事情	2615.62600,4,25,16776960,1515337426,1,1b110846,4165148144,1	1515337426	2615.62600	4165148144	,1,	1b110846	16776960	4,25	6000		0		0		k-v	0
29495211		chat.bilibili.com	过去的三天 大海 太阳 家庭时光	2598.15900,4,25,16776960,1515337352,1,1b110846,4165144120,1	1515337352	2598.15900	4165144120	,1,	1b110846	16776960	4,25	6000		0		0		k-v	0
29495211		chat.bilibili.com	自己买一杯!	2590.79600,4,25,16711935,1515337221,1,1b110846,4165136745,1	1515337221	2590.79600	4165136745	,1,	1b110846	16711935	4,25	6000		0		0		k-v	0		有标点符号
29495211		chat.bilibili.com	我要喝你的奶昔	2585.01900,4,25,255,1515337202,1,1b110846,4165135694,1	1515337202	2585.01900	4165135694	,1,	1b110846	255	4,25	6000		0		0		k-v	0
29495211		chat.bilibili.com	嗯哼！	2582.35900,4,25,16711935,1515337189,1,1b110846,4165134951,1	1515337189	2582.35900	4165134951	,1,	1b110846	16711935	4,25	6000		0		0		k-v	0		有标点符号
29495211		chat.bilibili.com	你和妈妈开心吗？	2582.35900,4,25,16776960,1515337183,1,1b110846,4165134652,1	1515337183	2582.35900	4165134652	,1,	1b110846	16776960	4,25	6000		0		0		k-v	0		有标点符号
29495211		chat.bilibili.com	不！ （好喜欢diss她爸爸	2575.52300,4,25,16711935,1515337157,1,1b110846,4165133271,1	1515337157	2575.52300	4165133271	,1,	1b110846	16711935	4,25	6000		0		0		k-v	0		有标点符号	夹带个人评论
29495211		chat.bilibili.com	菲菲你想我吗	2575.52300,4,25,255,1515337135,1,1b110846,4165132058,1	1515337135	2575.52300	4165132058	,1,	1b110846	255	4,25	6000		0		0		k-v	0
29495211		chat.bilibili.com	想我吗	2563.20100,4,25,255,1515337114,1,1b110846,4165130927,1	1515337114	2563.20100	4165130927	,1,	1b110846	255	4,25	6000		0		0		k-v	0
29495211		chat.bilibili.com	很好，但我很累	2561.71100,4,25,255,1515337106,1,1b110846,4165130468,1	1515337106	2561.71100	4165130468	,1,	1b110846	255	4,25	6000		0		0		k-v	0		有标点符号
29495211		chat.bilibili.com	拉斯维加斯怎么样	2561.71100,4,25,16776960,1515337097,1,1b110846,4165129968,1	1515337097	2561.71100	4165129968	,1,	1b110846	16776960	4,25	6000		0		0		k-v	0
29495211		chat.bilibili.com	这是在LA最美好的事情	2555.56200,4,25,16776960,1515337076,1,1b110846,4165128772,1	1515337076	2555.56200	4165128772	,1,	1b110846	16776960	4,25	6000		0		0		k-v	0		常见地名缩写
29495211		chat.bilibili.com	杰从拉斯维加斯回来，所以我们准备在海边吃一顿家庭晚餐	2552.42100,4,25,16776960,1515337061,1,1b110846,4165128045,1	1515337061	2552.42100	4165128045	,1,	1b110846	16776960	4,25	6000		0		0		k-v	0
29495211		chat.bilibili.com	天气又热 孩子们都不配合	2332.16100,4,25,16776960,1515336955,1,1b110846,4165122149,1	1515336955	2332.16100	4165122149	,1,	1b110846	16776960	4,25	6000		0		0		k-v	0
29495211		chat.bilibili.com	一切都非常地美好啊，独角兽到处都是啊，各种东西都很可爱啊	2083.68400,4,25,16776960,1515336784,1,1b110846,4165111659,1	1515336784	2083.68400	4165111659	,1,	1b110846	16776960	4,25	6000		0		0		k-v	0		有标点符号
29495211		chat.bilibili.com	希望她长大了我们依然是好朋友	1953.83700,4,25,16776960,1515336721,1,1b110846,4165108208,1	1515336721	1953.83700	4165108208	,1,	1b110846	16776960	4,25	6000		0		0		k-v	0
29495211		chat.bilibili.com	反正就是三岁的菲菲多么的天真无邪，我也是非常非常地幸福	1945.50300,4,25,16776960,1515336689,1,1b110846,4165106399,1	1515336689	1945.50300	4165106399	,1,	1b110846	16776960	4,25	6000		0		0		k-v	0
29495211		chat.bilibili.com	最后我脑中的画面是，那些小孩儿和菲菲互相问候和谐相处	1808.93300,4,25,16776960,1515336578,1,1b110846,4165100138,1	1515336578	1808.93300	4165100138	,1,	1b110846	16776960	4,25	6000		0		0		k-v	0		有标点符号
29495211		chat.bilibili.com	我觉得给孩子试镜非常地奇怪，因为我不想听起来很尖酸刻薄	1794.01500,4,25,16776960,1515336487,1,1b110846,4165095070,1	1515336487	1794.01500	4165095070	,1,	1b110846	16776960	4,25	6000		0		0		k-v	0
29495211		chat.bilibili.com	我绝对是继承了我爸爸工作非常有激情非常投入的优点哦！	1657.44000,4,25,16776960,1515336358,1,1b110846,4165087811,1	1515336358	1657.44000	4165087811	,1,	1b110846	16776960	4,25	6000		0		0		k-v	0		有标点符号
29495211		chat.bilibili.com	我非常紧张非常激动，这是第一次菲菲和她的朋友搞这样的活动	1620.07800,4,25,16776960,1515336188,1,1b110846,4165077356,1	1515336188	1620.07800	4165077356	,1,	1b110846	16776960	4,25	6000		0		0		k-v	0		有标点符号
29495211		chat.bilibili.com	感觉他们非常地假面夫妻	551.21500,4,25,16776960,1515336070,1,1b110846,4165068750,1	1515336070	551.21500	4165068750	,1,	1b110846	16776960	4,25	6000		0		0		k-v	0
29495211		chat.bilibili.com	非常愉快，最棒的一天	45.94900,4,25,16776960,1515335574,1,1b110846,4164887868,1	1515335574	45.94900	4164887868	,1,	1b110846	16776960	4,25	6000		0		0		k-v	0		有标点符号
29495211		chat.bilibili.com	不！妈妈是老大	31.13500,4,25,16711935,1515335539,1,1b110846,4164885814,1	1515335539	31.13500	4164885814	,1,	1b110846	16711935	4,25	6000		0		0		k-v	0		有标点符号
29495211		chat.bilibili.com	我忘了你是家里老大	29.55900,4,25,255,1515335527,1,1b110846,4164885156,1	1515335527	29.55900	4164885156	,1,	1b110846	255	4,25	6000		0		0		k-v	0
29495211		chat.bilibili.com	菲菲和我	24.24100,4,25,16776960,1515335507,1,1b110846,4164884067,1	1515335507	24.24100	4164884067	,1,	1b110846	16776960	4,25	6000		0		0		k-v	0
29495211		chat.bilibili.com	这是杰	22.67200,4,25,16776960,1515335500,1,1b110846,4164883640,1	1515335500	22.67200	4164883640	,1,	1b110846	16776960	4,25	6000		0		0		k-v	0
29495211		chat.bilibili.com	随便翻翻 大家随便看看	12.89600,4,25,16776960,1515335445,1,1b110846,4164880683,1	1515335445	12.89600	4164880683	,1,	1b110846	16776960	4,25	6000		0		0		k-v	0		志愿译者的翻译自白
29495211		chat.bilibili.com	一直跳一直跑	489.08100,4,25,16776960,1515335390,1,1b110846,4164877638,1	1515335390	489.08100	4164877638	,1,	1b110846	16776960	4,25	6000		0		0		k-v	0
29495211		chat.bilibili.com	菲菲非常地有活力	486.20300,4,25,16776960,1515335378,1,1b110846,4164877023,1	1515335378	486.20300	4164877023	,1,	1b110846	16776960	4,25	6000		0		0		k-v	0
29495211		chat.bilibili.com	总之就是一切都搞定了	452.24300,4,25,16711680,1515335328,1,1b110846,4164874122,1	1515335328	452.24300	4164874122	,1,	1b110846	16711680	4,25	6000		0		0		k-v	0
29495211		chat.bilibili.com	杰和他的朋友去拉斯维加斯的行程如何了？	443.88100,4,25,16776960,1515335252,1,1b110846,4164869851,1	1515335252	443.88100	4164869851	,1,	1b110846	16776960	4,25	6000		0		0		k-v	0		有标点符号
29495211		chat.bilibili.com	所有的事情非常快非常有趣呢	436.07600,4,25,16711680,1515335219,1,1b110846,4164868019,1	1515335219	436.07600	4164868019	,1,	1b110846	16711680	4,25	6000		0		0		k-v	0
29495211		chat.bilibili.com	她很棒啦！棒棒哒老板	432.10500,4,25,16711680,1515335197,1,1b110846,4164866822,1	1515335197	432.10500	4164866822	,1,	1b110846	16711680	4,25	6000		0		0		k-v	0		有标点符号
29495211		chat.bilibili.com	野生菌受不了了，这小孩也有造型师	413.95200,4,25,16776960,1515335149,0,1b110846,4164864157,1	1515335149	413.95200	4164864157	,0,	1b110846	16776960	4,25	6000		0		0		k-v	0
29495211		chat.bilibili.com	不只是活动的衣服，还有度假的衣服	409.51400,4,25,16776960,1515335086,1,1b110846,4164860541,1	1515335086	409.51400	4164860541	,1,	1b110846	16776960	4,25	6000		0		0		k-v	0		有标点符号
29495211		chat.bilibili.com	一定要确保给菲菲带了正确的衣服	405.51400,4,25,16776960,1515335030,1,1b110846,4164857409,1	1515335030	405.51400	4164857409	,1,	1b110846	16776960	4,25	6000		0		0		k-v	0
29495211		chat.bilibili.com	我作为一个妻子母亲还有自己的事业，目前我非常地有热情哟	395.10400,4,25,16776960,1515334965,1,1b110846,4164853856,1	1515334965	395.10400	4164853856	,1,	1b110846	16776960	4,25	6000		0		0		k-v	0		有标点符号	语气变化
29495211		chat.bilibili.com	我想要确定是不是所有事情都安排好了	386.42300,4,25,16776960,1515334873,1,1b110846,4164848764,1	1515334873	386.42300	4164848764	,1,	1b110846	16776960	4,25	6000		0		0		k-v	0
29495211		chat.bilibili.com	LA之旅即将到来	381.29100,4,25,16776960,1515334852,1,1b110846,4164847522,1	1515334852	381.29100	4164847522	,1,	1b110846	16776960	4,25	6000		0		0		k-v	0		常见地名缩写
29495211		chat.bilibili.com	哦，还有遛狗的哟	374.70600,4,25,16776960,1515334795,1,1b110846,4164844366,1	1515334795	374.70600	4164844366	,1,	1b110846	16776960	4,25	6000		0		0		k-v	0		有标点符号	语气变化
29495211		chat.bilibili.com	管家啊清洁员啊他们负责让房子布置，衣服摆放好，我们的主厨也非常地棒	370.21100,4,25,16776960,1515334775,1,1b110846,4164843206,1	1515334775	370.21100	4164843206	,1,	1b110846	16776960	4,25	6000		0		0		k-v	0
29495211		chat.bilibili.com	我的私人助理，帮助我打扮出门	344.78700,4,25,16776960,1515334579,1,1b110846,4164832266,1	1515334579	344.78700	4164832266	,1,	1b110846	16776960	4,25	6000		0		0		k-v	0		有标点符号	语气变化
29495211		chat.bilibili.com	明天几点你想做按摩马杀鸡	340.54700,4,25,16711680,1515334555,1,1b110846,4164830937,1	1515334555	340.54700	4164830937	,1,	1b110846	16711680	4,25	6000		0		0		k-v	0		有标点符号
29495211		chat.bilibili.com	然后你要美甲	335.08500,4,25,16711680,1515334534,1,1b110846,4164829837,1	1515334534	335.08500	4164829837	,1,	1b110846	16711680	4,25	6000		0		0		k-v	0
29495211		chat.bilibili.com	四点	333.67200,4,25,16711680,1515334525,1,1b110846,4164829289,1	1515334525	333.67200	4164829289	,1,	1b110846	16711680	4,25	6000		0		0		k-v	0
29495211		chat.bilibili.com	然后造型师会来	331.33400,4,25,16711680,1515334519,1,1b110846,4164828937,1	1515334519	331.33400	4164828937	,1,	1b110846	16711680	4,25	6000		0		0		k-v	0
29495211		chat.bilibili.com	一会你要上普拉提	325.80400,4,25,16711680,1515334497,1,1b110846,4164827819,1	1515334497	325.80400	4164827819	,1,	1b110846	16711680	4,25	6000		0		0		k-v	0
29495211		chat.bilibili.com	嗨嗨嗨 好嘛	323.39400,4,25,16776960,1515334480,1,1b110846,4164826784,1	1515334480	323.39400	4164826784	,1,	1b110846	16776960	4,25	6000		0		0		k-v	0
29495211		chat.bilibili.com	我觉得我是个非常幸运的男子	304.98000,4,25,255,1515334428,1,1b110846,4164824030,1	1515334428	304.98000	4164824030	,1,	1b110846	255	4,25	6000		0		0		k-v	0
29495211		chat.bilibili.com	我还记得我偷看一眼她向我走来，真的美极了。	302.79800,4,25,255,1515334416,1,1b110846,4164823344,1	1515334416	302.79800	4164823344	,1,	1b110846	255	4,25	6000		0		0		k-v	0
29495211		chat.bilibili.com	还有很美的花	289.88900,4,25,255,1515334349,1,1b110846,4164819337,1	1515334349	289.88900	4164819337	,1,	1b110846	255	4,25	6000		0		0		k-v	0
29495211		chat.bilibili.com	真的非常美好的婚礼	287.99100,4,25,16776960,1515334335,1,1b110846,4164818566,1	1515334335	287.99100	4164818566	,1,	1b110846	16776960	4,25	6000		0		0		k-v	0
29495211		chat.bilibili.com	我们的婚礼非常温馨，我爹爹领着我出场，我穿着我的梦想礼服	286.09500,4,25,16776960,1515334319,1,1b110846,4164817692,1	1515334319	286.09500	4164817692	,1,	1b110846	16776960	4,25	6000		0		0		k-v	0		有标点符号
29495211		chat.bilibili.com	婚礼有三天，我们有彩排晚宴，婚礼，接着还有疯狂的海滩派对	274.95700,4,25,16776960,1515334272,1,1b110846,4164815225,1	1515334272	274.95700	4164815225	,1,	1b110846	16776960	4,25	6000		0		0		k-v	0		有标点符号
29495211		chat.bilibili.com	我在11月的蜜月怀孕	256.36800,4,25,16776960,1515334208,1,1b110846,4164811714,1	1515334208	256.36800	4164811714	,1,	1b110846	16776960	4,25	6000		0		0		k-v	0		月份用阿拉伯数字
29495211		chat.bilibili.com	我们六月结婚	254.70000,4,25,16776960,1515334189,1,1b110846,4164810785,1	1515334189	254.70000	4164810785	,1,	1b110846	16776960	4,25	6000		0		0		k-v	0
29495211		chat.bilibili.com	是的，我们在一月认识，一周后就订婚了。	251.63400,4,25,16776960,1515334179,1,1b110846,4164810180,1	1515334179	251.63400	4164810180	,1,	1b110846	16776960	4,25	6000		0		0		k-v	0		有标点符号
29495211		chat.bilibili.com	一见钟情？	246.66400,4,25,255,1515334151,1,1b110846,4164808729,1	1515334151	246.66400	4164808729	,1,	1b110846	255	4,25	6000		0		0		k-v	0		有标点符号	表达疑问？
29495211		chat.bilibili.com	石头	217.14200,4,25,255,1515334061,1,1b110846,4164803853,1	1515334061	217.14200	4164803853	,1,	1b110846	255	4,25	6000		0		0		k-v	0
29495211		chat.bilibili.com	我都不知道她哪儿蹦出来的	217.14200,4,25,16776960,1515334055,1,1b110846,4164803502,1	1515334055	217.14200	4164803502	,1,	1b110846	16776960	4,25	6000		0		0		k-v	0
29495211		chat.bilibili.com	他们两人的关系非常特别，非常可爱，非常开心	189.17400,4,25,255,1515334011,1,1b110846,4164801044,1	1515334011	189.17400	4164801044	,1,	1b110846	255	4,25	6000		0		0		k-v	0		有标点符号
29495211		chat.bilibili.com	我毫不介意	184.74500,4,25,255,1515333984,1,1b110846,4164799566,1	1515333984	184.74500	4164799566	,1,	1b110846	255	4,25	6000		0		0		k-v	0
29495211		chat.bilibili.com	菲菲很黏妈妈	183.54200,4,25,255,1515333928,1,1b110846,4164796566,1	1515333928	183.54200	4164796566	,1,	1b110846	255	4,25	6000		0		0		k-v	0
29495211		chat.bilibili.com	有时候作为一家之主是不容易的	168.40500,4,25,255,1515333896,1,1b110846,4164794869,1	1515333896	168.40500	4164794869	,1,	1b110846	255	4,25	6000		0		0		k-v	0
29495211		chat.bilibili.com	不！	152.30000,4,25,16711935,1515333803,1,1b110846,4164789949,1	1515333803	152.30000	4164789949	,1,	1b110846	16711935	4,25	6000		0		0		k-v	0		有标点符号
29495211		chat.bilibili.com	是真的吗	152.30000,4,25,16776960,1515333797,1,1b110846,4164789602,1	1515333797	152.30000	4164789602	,1,	1b110846	16776960	4,25	6000		0		0		k-v	0
29495211		chat.bilibili.com	看我的杯子写着：最好的爸爸	149.17500,4,25,255,1515333784,1,1b110846,4164788900,1	1515333784	149.17500	4164788900	,1,	1b110846	255	4,25	6000		0		0		k-v	0		有标点符号	冒号
29495211		chat.bilibili.com	牛奶味的亲亲	144.73600,4,25,16776960,1515333758,1,1b110846,4164787446,1	1515333758	144.73600	4164787446	,1,	1b110846	16776960	4,25	6000		0		0		k-v	0
29495211		chat.bilibili.com	我想也许四个人也不错	140.90300,4,25,255,1515333729,1,1b110846,4164785884,1	1515333729	140.90300	4164785884	,1,	1b110846	255	4,25	6000		0		0		k-v	0
29495211		chat.bilibili.com	所以我们会一直三个人	140.15900,4,25,16776960,1515333657,1,1b110846,4164782090,1	1515333657	140.15900	4164782090	,1,	1b110846	16776960	4,25	6000		0		0		k-v	0
29495211		chat.bilibili.com	我们三个组成了家，大家都说三角形是最稳定的结构	135.46400,4,25,16776960,1515333636,1,1b110846,4164780983,1	1515333636	135.46400	4164780983	,1,	1b110846	16776960	4,25	6000		0		0		k-v	0		有标点符号
29495211		chat.bilibili.com	杰、菲菲和我	129.50500,4,25,16776960,1515333610,1,1b110846,4164779640,1	1515333610	129.50500	4164779640	,1,	1b110846	16776960	4,25	6000		0		0		k-v	0		有标点符号	顿号
29495211		chat.bilibili.com	说实话，我无法奢求更多，真的很棒！	121.61300,4,25,16776960,1515333586,1,1b110846,4164778339,1	1515333586	121.61300	4164778339	,1,	1b110846	16776960	4,25	6000		0		0		k-v	0		有标点符号	感叹号
29495211		chat.bilibili.com	我现在的生活非常充实，非常开心	115.82700,4,25,16776960,1515333557,1,1b110846,4164776733,1	1515333557	115.82700	4164776733	,1,	1b110846	16776960	4,25	6000		0		0		k-v	0		有标点符号
29495211		chat.bilibili.com	谢谢 干杯	111.13500,4,25,16776960,1515333534,1,1b110846,4164775482,1	1515333534	111.13500	4164775482	,1,	1b110846	16776960	4,25	6000		0		0		k-v	0
29495211		chat.bilibili.com	菲菲不要洒出来 坐下	103.66300,4,25,16776960,1515333508,1,1b110846,4164774079,1	1515333508	103.66300	4164774079	,1,	1b110846	16776960	4,25	6000		0		0		k-v	0
29495211		chat.bilibili.com	听懂了OK	338.21900,1,25,16777215,1515332801,0,8242d282,4164742484,1	1515332801	338.21900	4164742484	,0,	8242d282	16777215	1,25	6000		0		0		k-v	0
29495211		chat.bilibili.com	有时候上班也会带着女儿	1006.43100,1,25,16777215,1515332843,0,6445e171,4164738133,1	1515332843	1006.43100	4164738133	,0,	6445e171	16777215	1,25	6000		0		0		k-v	0
29495211		chat.bilibili.com	他们为了女儿建了一个泳池就为了她能时而去玩	599.34300,1,25,16777215,1515332507,0,6445e171,4164720239,1	1515332507	599.34300	4164720239	,0,	6445e171	16777215	1,25	6000		0		0		k-v	0
29495211		chat.bilibili.com	好多玩具。。。。	510.74900,1,25,16777215,1515332419,0,6445e171,4164715553,1	1515332419	510.74900	4164715553	,0,	6445e171	16777215	1,25	6000		0		0		k-v	0
29495211		chat.bilibili.com	他们都不知道自己养了多少条狗	396.85500,1,25,16777215,1515332306,0,6445e171,4164709520,1	1515332306	396.85500	4164709520	,0,	6445e171	16777215	1,25	6000		0		0		k-v	0
29495211		chat.bilibili.com	假装听得懂	59.36700,1,25,16777215,1515331817,0,a102cf09,4164683628,1	1515331817	59.36700	4164683628	,0,	a102cf09	16777215	1,25	6000		0		0		k-v	0
29495211		chat.bilibili.com	真 公主	589.11300,1,25,16777215,1515331478,0,ead60f0f,4164665531,1	1515331478	589.11300	4164665531	,0,	ead60f0f	16777215	1,25	6000		0		0		k-v	0
29495211		chat.bilibili.com	我告诉自己尽量不要溺爱她，但有时候，确实有一点	602.87500,1,25,16777215,1515331135,0,c0822f13,4164647499,1	1515331135	602.87500	4164647499	,0,	c0822f13	16777215	1,25	6000		0		0		k-v	0		有标点符号
29495211		chat.bilibili.com	他们婚礼貌似花了1200万	278.82500,1,25,16777215,1515330930,0,ead60f0f,4164643224,1	1515330930	278.82500	4164643224	,0,	ead60f0f	16777215	1,25	6000		0		0		k-v	0		自己也不确定是否准确的内容
29495211		chat.bilibili.com	她老公总感觉眼睛好奇怪	192.34600,1,25,16777215,1515331023,0,40a54b8d,4164641463,1	1515331023	192.34600	4164641463	,0,	40a54b8d	16777215	1,25	6000		0		0		k-v	0
29495211		chat.bilibili.com	是一个精力旺盛的妹子啊啊啊	487.50800,1,25,16777215,1515330996,0,c0822f13,4164640056,1	1515330996	487.50800	4164640056	,0,	c0822f13	16777215	1,25	6000		0		0		k-v	0
29495211		chat.bilibili.com	我们的婚礼像个party 而不是婚礼	282.93300,1,25,16777215,1515330748,0,c0822f13,4164627157,1	1515330748	282.93300	4164627157	,0,	c0822f13	16777215	1,25	6000		0		0		k-v	0		party直接用
29495211		chat.bilibili.com	我们的婚礼进行了三天 吧啦吧啦	267.57600,1,25,16777215,1515330711,0,c0822f13,4164625225,1	1515330711	267.57600	4164625225	,0,	c0822f13	16777215	1,25	6000		0		0		k-v	0		部分信息省略
29495211		chat.bilibili.com	最好的爸爸 真的吗? 不是真的 ...	149.07600,1,25,16777215,1515330568,0,c0822f13,4164618084,1	1515330568	149.07600	4164618084	,0,	c0822f13	16777215	1,25	6000		0		0		k-v	0		有标点符号	省略号？
29495211		chat.bilibili.com	oh careful	123.42200,1,25,16777215,1515330506,0,c0822f13,4164614860,1	1515330506	123.42200	4164614860	,0,	c0822f13	16777215	1,25	6000		0		0		k-v	0
29495211		chat.bilibili.com	还好英语没白学 终于用上了	93.11400,1,25,16777215,1515330389,0,c0822f13,4164608703,1	1515330389	93.11400	4164608703	,0,	c0822f13	16777215	1,25	6000		0		0		k-v	0
29495211		chat.bilibili.com	同求	194.11800,1,25,16777215,1515330216,0,84d1f2d,4164599759,1	1515330216	194.11800	4164599759	,0,	84d1f2d	16777215	1,25	6000		0		0		k-v	0
29495211		chat.bilibili.com	承包空屏	44.43000,1,25,16777215,1515330189,0,4090a5c,4164598388,1	1515330189	44.43000	4164598388	,0,	4090a5c	16777215	1,25	6000		0		0		k-v	0
29495211		chat.bilibili.com	没字幕？	36.14400,1,25,16777215,1515327957,0,f58f0965,4164481759,1	1515327957	36.14400	4164481759	,0,	f58f0965	16777215	1,25	6000		0		0		k-v	0
29495211		chat.bilibili.com	...堪比看哑剧	200.45500,1,25,16777215,1515326269,0,f4b9f625,4164395072,1	1515326269	200.45500	4164395072	,0,	f4b9f625	16777215	1,25	6000		0		0		k-v	0
29495211		chat.bilibili.com	Not you are not down to earth family	41.55800,1,25,16777215,1515324768,0,c722bca0,4164327209,1	1515324768	41.55800	4164327209	,0,	c722bca0	16777215	1,25	6000		0		0		k-v	0
29495211		chat.bilibili.com	同求	26.63000,1,25,16777215,1515324279,0,62616c07,4164298150,1	1515324279	26.63000	4164298150	,0,	62616c07	16777215	1,25	6000		0		0		k-v	0
29495211		chat.bilibili.com	感觉好无聊	1022.42900,1,25,16777215,1515323572,0,eb2213ae,4164280653,1	1515323572	1022.42900	4164280653	,0,	eb2213ae	16777215	1,25	6000		0		0		k-v	0
29495211		chat.bilibili.com	我也想	22.44200,1,25,16777215,1515323892,0,f6db328c,4164279914,1	1515323892	22.44200	4164279914	,0,	f6db328c	16777215	1,25	6000		0		0		k-v	0
29495211		chat.bilibili.com	第一条弹幕？	1.70200,1,25,8700107,1515321846,0,7eef691b,4164200660,1	1515321846	1.70200	4164200660	,0,	7eef691b	8700107	1,25	6000		0		0		k-v	0
29495211		chat.bilibili.com	想要个翻译	18.21400,1,25,16777215,1515322153,0,92cfcc0a,4164199296,1	1515322153	18.21400	4164199296	,0,	92cfcc0a	16777215	1,25	6000		0		0		k-v	0
29495211		chat.bilibili.com	？？	341.57500,1,25,16777215,1515321656,0,fedbe88f,4164176572,1	1515321656	341.57500	4164176572	,0,	fedbe88f	16777215	1,25	6000		0		0		k-v	0
29495211		chat.bilibili.com	前面的我也	194.76800,1,25,16777215,1515321274,0,a8eea1c4,4164174572,1	1515321274	194.76800	4164174572	,0,	a8eea1c4	16777215	1,25	6000		0		0		k-v	0
29495211		chat.bilibili.com	听不懂的有吗……	196.58600,1,25,16777215,1515318828,0,30a1ee95,4164049857,1	1515318828	196.58600	4164049857	,0,	30a1ee95	16777215	1,25	6000		0		0		k-v	0
29495211		chat.bilibili.com	求野生字幕君	191.76200,1,25,16777215,1515318175,0,83542329,4164020793,1	1515318175	191.76200	4164020793	,0,	83542329	16777215	1,25	6000		0		0		k-v	0
29495211		chat.bilibili.com	没人么？还打算看人翻译来着	187.25300,1,25,16777215,1515317921,0,a975b05d,4164008438,1	1515317921	187.25300	4164008438	,0,	a975b05d	16777215	1,25	6000		0		0		k-v	0
